# Supplementary material for: Transfer hydrogenation of N-heteroarenes with 2-propanol and ethanol enabled by manganese catalysis
Source: Royal Society of Chemistry journal article supplement (doi:10.1039/d1qo01552d), 2021-01-01
Supplement: d1qo01552d1.pdf [file d1qo01552d1.pdf]

## Supporting Information

### Transfer Hydrogenation of *N*-Heteroarenes with 2-Propanol and Ethanol

#### Enabled by Manganese Catalysis

Yingjie Gong,<sup>a</sup> Jingxi He,<sup>a</sup> Xiaoting Wen,<sup>a</sup> Hui Xi,<sup>b</sup> Zhihong Wei,<sup>c\*</sup> Weiping Liu<sup>a\*</sup>

<sup>a</sup> College of Chemistry, Chemical Engineering and Biotechnology, Donghua University, Shanghai, 201620, P. R. China

<sup>b</sup> Key Laboratory of Tobacco Flavor Basic Research of CNTC, Zhengzhou Tobacco Research Institute of CNTC, Zhengzhou 450001, China

<sup>c</sup> Institute of Molecular Science, Key Laboratory of Materials for Energy Conversion and Storage of Shanxi Province, Shanxi University, Taiyuan 030006, P. R. China.

E-mail: [weipingliu@dhu.edu.cn](mailto:weipingliu@dhu.edu.cn)

E-mail: [weizhihong@sxu.edu.cn](mailto:weizhihong@sxu.edu.cn)

|                                                                             |      |
|-----------------------------------------------------------------------------|------|
| General remarks                                                             | S 2  |
| Synthesis of Substrates                                                     | S 3  |
| General procedure of catalytic experiments                                  | S 6  |
| Characterization data of isolated products                                  | S 7  |
| Experimental mechanistic studies                                            | S22  |
| Proposed mechanism cycle                                                    | S28  |
| DFT calculation studies                                                     | S29  |
| NMR spectra                                                                 | S31  |
| Energetic Data and Cartesian Coordinates (xyz) for All Optimized Structures | S65  |
| References                                                                  | S101 |

## General remarks

All catalytic reactions were performed under argon atmosphere using standard Schlenk techniques. Extra dry solvents were purchased from Adamas and degassed before using. Other chemicals were obtained from commercial sources and were used without further purification. Substrate and catalysts **1g**,<sup>1</sup> **1k**,<sup>2</sup> **1n**,<sup>3</sup> **1o-1q**,<sup>4</sup> **1s-1u**,<sup>4</sup> **1w**,<sup>5</sup> **Mn-1-Mn-4**,<sup>6</sup> and **Mn-5**<sup>7</sup> were synthesized according to literatures methods. <sup>1</sup>H NMR, <sup>13</sup>C NMR, <sup>31</sup>P NMR and <sup>19</sup>F NMR spectra were recorded on a Bruker AV 400 or Bruker AV 600 spectrometer. Multiplicity is abbreviated as: s, singlet; d, doublet; dd, doublet of doublets; t, triplet; q, quartet; m, multiplet; br, broad. GC yields were determined by GC-FID, Agilent 8860 Network with FID detector, using *n*-hexadecane as an internal standard.

## Synthesis of Substrates

### Synthesis of 6-arylquinoline:

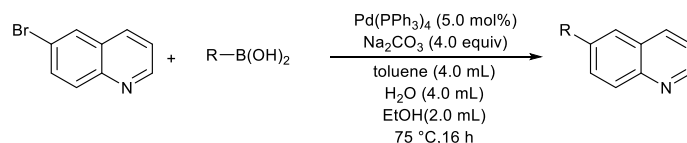

A Schlenk flask (50.0 mL) containing a stirring bar was sequentially charged with 6-bromo-quinoline (0.7 mL, 5.0 mmol, 1.0 equiv.), sodium carbonate (2.12 g, 20.0 mmol, 4.0 equiv.), boronic acid (6.0 mmol, 1.2 equiv.), water (4.0 mL), toluene (4.0 mL), ethanol (2.0 mL) and  $Pd(PPh_3)_4$  (0.29 g, 0.25 mmol, 5.0 mol%) under argon, then the mixture was heated to  $75\text{--}90\text{ }^\circ\text{C}$  for 12–16 hours. Thereafter the mixture was filtered through a plug of celite, the filtrate was diluted with water (20.0 mL) and extracted with  $CH_2Cl_2$  (3 x 20.0 mL). The combined organic phase were washed with brine (20.0 mL) and dried over  $MgSO_4$ . The drying agent was filtered off and the solvent was evaporated. The crude material was purified by chromatography on silica gel.

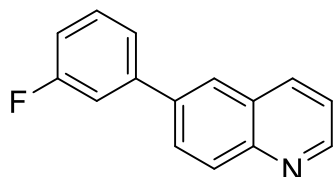

**6-(3-Fluorophenyl)quinoline (1r):** The procedure was followed using (3-fluorophenyl)boronic acid (839.5 mg, 6.0 mmol),  $80\text{ }^\circ\text{C}$  for 12 h. Purification by silica gel column chromatography (Petroleum ether/ Ethyl acetate: 50:1→10:1) yielded **1r** (0.92 g, 83%).  $^1H$  NMR (400 MHz,  $CDCl_3$ )  $\delta$  = 8.93 (dd,  $J$  = 4.2, 1.7 Hz, 1H), 8.24–8.17 (m, 2H), 8.01–7.89 (m, 2H), 7.51–7.36 (m, 4H), 7.15–7.02 (m, 1H).  $^{13}C$  NMR (150 MHz,  $CDCl_3$ )  $\delta$  = 163.3 (d,  $^1J_{C-F}$  = 245 Hz), 150.5, 147.6, 142.4 (d,  $^3J_{C-F}$  = 8 Hz), 138.0 (d,  $^4J_{C-F}$  = 2 Hz), 136.6, 130.5 (d,  $^3J_{C-F}$  = 8 Hz), 129.9, 129.0, 128.4, 125.7, 123.1 (d,  $^4J_{C-F}$  = 3 Hz), 121.6, 114.5 (d,  $^2J_{C-F}$  = 21 Hz), 114.3 (d,  $^2J_{C-F}$  = 23 Hz).  $^{19}F$  NMR (565 MHz,  $CDCl_3$ )  $\delta$  = -112.53. HR-MS (ESI):  $m/z$  calculated for  $C_{15}H_{11}F_1N_1$  [ $M+H^+$ ]: 224.0870, found: 224.0867.

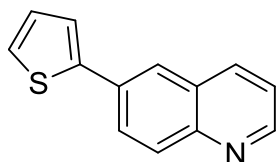

**6-(Thiophen-2-yl)quinoline (1t):** The procedure was followed using thiophen-2-ylboronic acid (767.8 mg, 6.0 mmol), 90 °C for 16 h. Purification by silica gel column chromatography (Petroleum ether/ Ethyl acetate: 40:1→5:1) yielded **1t** (1.05 g, 99%). <sup>1</sup>H NMR (400 MHz, CDCl<sub>3</sub>) δ = 8.88 (dd, *J* = 4.2, 1.7 Hz, 1H), 8.17 (dd, *J* = 8.3, 1.6 Hz, 1H), 8.11 (d, *J* = 8.7 Hz, 1H), 8.03–7.97 (m, 2H), 7.47 (dd, *J* = 3.6, 1.2 Hz, 1H), 7.41 (dd, *J* = 8.3, 4.2 Hz, 1H), 7.36 (dd, *J* = 5.1, 1.1 Hz, 1H), 7.14 (dd, *J* = 5.1, 3.6 Hz, 1H). <sup>13</sup>C NMR (150 MHz, CDCl<sub>3</sub>) δ = 150.3, 147.7, 143.5, 136.0, 132.6, 130.0, 128.6, 128.3, 128.0, 125.7, 124.1, 123.7, 121.7. HR-MS (ESI): *m/z* calculated for C<sub>13</sub>H<sub>10</sub>S<sub>1</sub>N<sub>1</sub> [M+H<sup>+</sup>]: 212.0528, found: 212.0526.

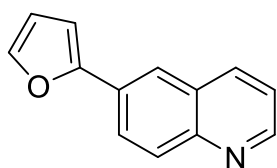

**6-(Furan-2-yl)quinoline (1u):** The procedure was followed using furan-2-ylboronic acid (685.0 mg, 6.0 mmol), 90 °C for 16 h. Purification by silica gel column chromatography (Petroleum ether/ Ethyl acetate: 40:1→5:1) yielded **1u** (0.95 g, 98%). <sup>1</sup>H NMR (400 MHz, CDCl<sub>3</sub>) δ = 8.87 (dd, *J* = 4.2, 1.7 Hz, 1H), 8.16 (dd, *J* = 8.4, 1.7 Hz, 1H), 8.12–8.07 (m, 2H), 8.00 (dd, *J* = 8.9, 1.9 Hz, 1H), 7.54 (d, *J* = 1.7 Hz, 1H), 7.40 (dd, *J* = 8.3, 4.2 Hz, 1H), 6.81 (dd, *J* = 3.4, 0.7 Hz, 1H), 6.53 (dd, *J* = 3.4, 1.8 Hz, 1H). <sup>13</sup>C NMR (150 MHz, CDCl<sub>3</sub>) δ = 153.2, 150.1, 147.6, 142.8, 136.1, 129.8, 128.8, 128.5, 125.9, 121.6, 121.6, 112.0, 106.5. HR-MS (ESI): *m/z* calculated for C<sub>13</sub>H<sub>10</sub>O<sub>1</sub>N<sub>1</sub> [M+H<sup>+</sup>]: 196.0757, found: 196.0755.

#### Synthesis of *N*-benzylquinolin-6-amine:

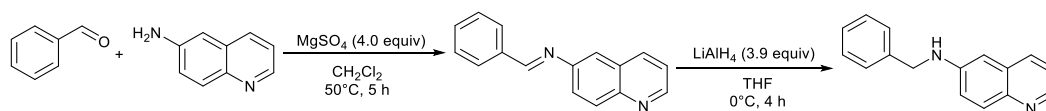

Benzaldehyde (0.51 mL, 5.0 mmol) and quinolin-6-amine (0.720 mg, 5.0 mmol) were

dissolved in CH<sub>2</sub>Cl<sub>2</sub> (20.0 mL), then MgSO<sub>4</sub> (2.407 g, 20.0 mmol) were added and the mixture was stirred at 50 °C for 5 hours. Afterwards, the mixture was filtered over Celite®. The filtrate was concentrated in *vacuum* to obtain a clear yellow liquid. Then dissolved in THF (8.0 mL) and cooled to 0 °C. Lithium aluminium hydride (0.759 mg, 20 mmol) was added slowly to the solution and the mixture was stirred for 4 h. CH<sub>2</sub>Cl<sub>2</sub> and small amount of MeOH and water was added, and then the mixture was extracted twice with CH<sub>2</sub>Cl<sub>2</sub>. The combined organic layer was washed with brine, dried over MgSO<sub>4</sub>, filtered and concentrated in *vacuum*. The crude product was purified by silica gel column chromatography (Ethyl acetate/ Petroleum ether/ NEt<sub>3</sub>= 50:50:1) to afford *N*-benzylquinolin-6-amine as a brown solid (0.714 g, 61%).

<sup>1</sup>H NMR (400 MHz, CDCl<sub>3</sub>) δ = 8.63–8.57 (m, 1H), 7.91–7.82 (m, 2H), 7.43–7.32 (m, 4H), 7.31–7.26 (m, 1H), 7.28–7.19 (m, 1H), 7.13–7.07 (m, 1H), 6.72–6.66 (m, 1H), 4.42 (s, 3H).

The analytical data are consistent with those previously reported literature.<sup>8</sup>

## General procedure of catalytic experiments

### General procedure for the transfer hydrogenation of *N*-heteroarenes with *i*-Propanol:

In glovebox, a Schlenk sealed pressure tube (10.0 mL) containing a stirring bar was sequentially charged with **Mn-1** (2.0-3.0 mol%) and KO*t*-Bu (0.6 mmol, 1.2 equiv.). Afterwards, the reaction tube was capped and brought out of the glovebox. Then dry THF (1.0 mL), substrate (0.5 mmol, 1.0 equiv.) and *i*-Propanol (0.1 mL) were added under argon flow. Then the pressure tube was placed into a preheated aluminum block for 16–24 h. After the tube was cooled to ambient temperature, the reaction mixture was diluted with DCM (3.0 mL) and analyzed by GC using hexadecane as internal standard. The reaction mixture was purified by silica gel column chromatography to give the corresponding products.

### General procedure for the transfer hydrogenation of *N*-heteroarenes with EtOH:

In glovebox, a Schlenk sealed pressure tube (10.0 mL) containing a stirring bar was sequentially charged with **Mn-2** (2.0 mol%) and KO*t*-Bu (0.6 mmol, 1.2 equiv.). Afterwards, the reaction tube was capped and brought out of the glovebox. Then dry 1,4-dioxane (1.0 mL), substrate (0.5 mmol, 1.0 equiv.) and EtOH (0.1 mL) were added under argon flow. Then the pressure tube was placed into a preheated aluminum block for 16 h. After the tube was cooled to ambient temperature, the reaction mixture was diluted with DCM (3.0 mL) and purified by silica gel column chromatography to give the corresponding products.

## Characterization data of isolated products

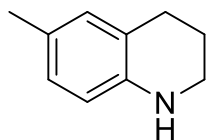

**6-Methyl-1,2,3,4-tetrahydroquinoline (2b):** The procedure was followed using 6-methylquinoline (68  $\mu\text{L}$ , 0.5 mmol), *i*-PrOH (0.1 mL) and **Mn-1** (8.3 mg, 0.015 mmol), 120  $^{\circ}\text{C}$  for 16 h. Purification by column chromatography of Silica gel (Petroleum ether/ Ethyl acetate: 50:1 $\rightarrow$ 20:1) yielded **2b** (58.7 mg, 80%).  $^1\text{H}$  NMR (400 MHz,  $\text{CDCl}_3$ )  $\delta$  = 6.83–6.78 (m, 2H), 6.43 (d,  $J$  = 8.6 Hz, 1H), 3.50–3.06 (m, 3H), 2.76 (t,  $J$  = 6.5 Hz, 2H), 2.23 (s, 3H), 2.00–1.91 (m, 2H).  $^{13}\text{C}$  NMR (100 MHz,  $\text{CDCl}_3$ )  $\delta$  = 142.5, 130.1, 127.3, 126.3, 121.6, 114.5, 42.2, 27.0, 22.5, 20.4. HR-MS (ESI):  $m/z$  calculated for  $\text{C}_{10}\text{H}_{14}\text{N}_1$  [ $\text{M}+\text{H}^+$ ]: 148.1121, found: 148.1118.

The analytical data are consistent with those previously reported literature.<sup>9</sup>

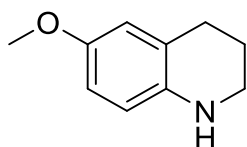

**6-Methoxy-1,2,3,4-tetrahydroquinoline (2c):** The procedure was followed using 6-methoxyquinoline (70  $\mu\text{L}$ , 0.5 mmol), *i*-PrOH (0.1 mL) and **Mn-1** (5.5 mg, 0.01 mmol), 100  $^{\circ}\text{C}$  for 16 h. Purification by column chromatography of Silica gel (Petroleum ether/ Ethyl acetate: 50:1 $\rightarrow$ 20:1) yielded **2c** (71.0 mg, 87%).  $^1\text{H}$  NMR (600 MHz,  $\text{CDCl}_3$ )  $\delta$  = 6.62–6.58 (m, 1H), 6.58–6.55 (m, 1H), 6.46 (d,  $J$  = 8.6 Hz, 1H), 3.73 (s, 3H), 3.28–3.23 (m, 2H), 3.20 (s, 1H), 2.76 (t,  $J$  = 6.5 Hz, 2H), 1.96–1.90 (m, 2H).  $^{13}\text{C}$  NMR (100 MHz,  $\text{CDCl}_3$ )  $\delta$  = 151.9, 138.9, 122.9, 115.7, 114.9, 112.9, 55.8, 42.4, 27.2, 22.5. HR-MS (ESI):  $m/z$  calculated for  $\text{C}_{10}\text{H}_{14}\text{N}_1\text{O}_1$  [ $\text{M}+\text{H}^+$ ]: 164.1070, found: 164.1068.

Ethanol as hydrogen source: The procedure was followed using 6-methoxyquinoline (70  $\mu\text{L}$ , 0.5 mmol), EtOH (0.1 mL) and **Mn-2** (6.2 mg, 0.01 mmol), 120  $^{\circ}\text{C}$  for 16 h. Purification by column chromatography of Silica gel (Petroleum ether/ Ethyl acetate: 50:1 $\rightarrow$ 20:1) yielded **2c** (49.0 mg, 60%).

The analytical data are consistent with those previously reported literature.<sup>9</sup>

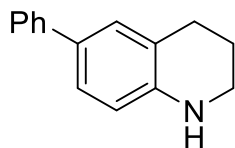

**6-Phenyl-1,2,3,4-tetrahydroquinoline (2d):** The procedure was followed using 6-phenylquinoline (102.7 mg, 0.5 mmol), *i*-PrOH (0.1 mL) and **Mn-1** (5.5 mg, 0.01 mmol), 120 °C for 16 h. Purification by column chromatography of Silica gel (Petroleum ether/ Ethyl acetate: 50:1→20:1) yielded **2d** (103.6 mg, 99%). <sup>1</sup>H NMR (400 MHz, CDCl<sub>3</sub>)  $\delta$  = 7.55–7.46 (m, 2H), 7.40–7.30 (m, 2H), 7.25–7.15 (m, 3H), 6.50–6.43 (m, 1H), 3.52 (s, 1H), 3.29–3.20 (m, 2H), 2.78 (t, *J* = 6.4 Hz, 2H), 1.96–1.87 (m, 2H). <sup>13</sup>C NMR (100 MHz, CDCl<sub>3</sub>)  $\delta$  = 144.4, 141.6, 129.9, 128.7, 128.3, 126.4, 126.0, 125.6, 121.7, 114.6, 42.1, 27.3, 22.3. HR-MS (ESI): *m/z* calculated for C<sub>15</sub>H<sub>16</sub>N<sub>1</sub> [M+H<sup>+</sup>]: 210.1277, found: 210.1271.

Ethanol as hydrogen source: The procedure was followed using 6-phenylquinoline (102.7 mg, 0.5 mmol), EtOH (0.1 mL) and **Mn-2** (6.2 mg, 0.01 mmol), 120 °C for 16 h. Purification by column chromatography of Silica gel (Petroleum ether/ Ethyl acetate: 50:1→20:1) yielded **2d** (86.5 mg, 83%).

The analytical data are consistent with those previously reported literature.<sup>10</sup>

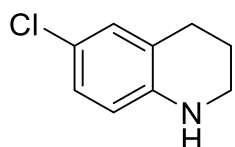

**6-Chloro-1,2,3,4-tetrahydroquinoline (2e):** The procedure was followed using 6-chloroquinoline (81.8 mg, 0.5 mmol), *i*-PrOH (0.1 mL) and **Mn-1** (5.5 mg, 0.01 mmol), 120 °C for 16 h. Purification by column chromatography of Silica gel (Petroleum ether/ Ethyl acetate: 50:1→20:1) yielded **2e** (79.6 mg, 95%). <sup>1</sup>H NMR (400 MHz, CDCl<sub>3</sub>)  $\delta$  = 6.93–6.87 (m, 2H), 6.41–6.35 (m, 1H), 3.66 (s, 1H), 3.33–3.23 (m, 2H), 2.72 (t, *J* = 6.4 Hz, 2H), 1.96–1.86 (m, 2H). <sup>13</sup>C NMR (100 MHz, CDCl<sub>3</sub>)  $\delta$  = 143.3, 129.0, 126.5, 122.9, 121.2, 115.1, 41.9, 26.9, 21.8. HR-MS (ESI):



$m/z$  calculated for  $C_9H_{11}Cl_1N_1$   $[M+H^+]$ : 168.0575, found: 168.0572.

The analytical data are consistent with those previously reported literature.<sup>9</sup>

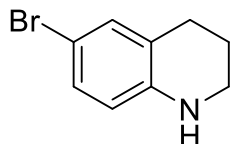

**6-Bromo-1,2,3,4-tetrahydroquinoline (2f)**: The procedure was followed using 6-bromoquinoline (68  $\mu$ L, 0.5 mmol), *i*-PrOH (0.1 mL) and **Mn-1** (5.5 mg, 0.01 mmol), 100 °C for 16 h. Purification by column chromatography of Silica gel (Petroleum ether/ Ethyl acetate: 50:1 $\rightarrow$ 20:1) yielded **2f** (84.8 mg, 80%). <sup>1</sup>H NMR (400 MHz, CDCl<sub>3</sub>)  $\delta$  = 7.09–6.98 (m, 2H), 6.34 (d,  $J$  = 8.3 Hz, 1H), 3.77 (s, 1H), 3.32–3.24 (m, 2H), 2.73 (t,  $J$  = 6.4 Hz, 2H), 1.95–1.87 (m, 2H). <sup>13</sup>C NMR (100 MHz, CDCl<sub>3</sub>)  $\delta$  = 143.7, 131.9, 129.4, 123.4, 115.5, 108.2, 41.8, 26.8, 21.7. HR-MS (ESI):  $m/z$  calculated for  $C_9H_{11}Br_1N_1$   $[M+H^+]$ : 212.0069, found: 212.0068.

The analytical data are consistent with those previously reported literature.<sup>11</sup>

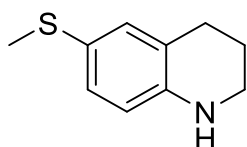

**6-(Methylthio)-1,2,3,4-tetrahydroquinoline (2g)**: The procedure was followed using 6-(methylthio)quinoline (87.7 mg, 0.5 mmol), *i*-PrOH (0.1 mL) and **Mn-1** (5.5 mg, 0.01 mmol), 120 °C for 16 h. Purification by column chromatography of Silica gel (Petroleum ether/ Ethyl acetate: 40:1 $\rightarrow$ 10:1) yielded **2g** (56.1 mg, 63%). <sup>1</sup>H NMR (400 MHz, CDCl<sub>3</sub>)  $\delta$  = 7.05–6.99 (m, 2H), 6.41 (d,  $J$  = 8.8 Hz, 1H), 3.83–3.05 (m, 3H), 2.74 (t,  $J$  = 6.4 Hz, 2H), 2.40 (s, 3H), 1.98–1.87 (m, 2H). <sup>13</sup>C NMR (100 MHz, CDCl<sub>3</sub>)  $\delta$  = 143.8, 131.8, 129.2, 123.4, 122.1, 114.7, 41.9, 26.9, 22.0, 19.4. HR-MS (ESI):  $m/z$  calculated for  $C_{10}H_{14}N_1S_1$   $[M+H^+]$ : 180.0841, found: 180.0836.

The analytical data are consistent with those previously reported literature.<sup>12</sup>

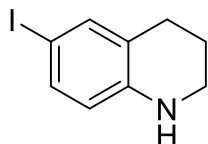

**6-iodo-1,2,3,4-tetrahydroquinoline (2h):** The procedure was followed using 6-iodoquinoline (127.5 mg, 0.5 mmol), *i*-PrOH (0.1 mL) and **Mn-1** (5.5 mg, 0.01 mmol), 100 °C for 16 h. Purification by column chromatography of Silica gel (Petroleum ether/ Ethyl acetate: 80:1→50:1) yielded **2h** (41.4 mg, 32%, 90% purity). <sup>1</sup>H NMR (400 MHz, DMSO-*d*<sub>6</sub>) δ = 7.15–7.05 (m, 2H), 6.32–6.22 (m, 1H), 5.87 (s, 1H), 3.18–3.12 (m, 2H), 2.62 (q, *J* = 6.0 Hz, 2H), 1.79–1.69 (m, 2H). <sup>13</sup>C NMR (100 MHz, DMSO-*d*<sub>6</sub>) δ = 145.5, 137.2, 135.1, 123.5, 116.2, 75.4, 40.9, 26.8, 21.4. GC-MS *m/z* (relative intensity): 259 (100) [M<sup>+</sup>], 260 (11), 258 (36), 132 (7), 131 (7), 130 (20). The analytical data are consistent with those previously reported literature.<sup>13</sup>

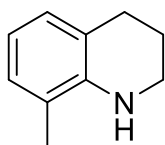

**8-Methyl-1,2,3,4-tetrahydroquinoline (2i):** The procedure was followed using 8-methylquinoline (70.1 μL, 0.5 mmol), *i*-PrOH (0.1 mL) and **Mn-1** (8.3 mg, 0.015 mmol), 120 °C for 24 h. Purification by column chromatography of Silica gel (Petroleum ether/ Ethyl acetate: 80:1→50:1) yielded **2i** (57.5 mg, 78%). <sup>1</sup>H NMR (400 MHz, CDCl<sub>3</sub>) δ = 6.98–6.83 (m, 2H), 6.65–6.58 (m, 1H), 3.44–3.39 (m, 2H), 2.84 (t, *J* = 6.4 Hz, 2H), 2.13 (s, 3H), 2.03–1.95 (m, 2H). <sup>13</sup>C NMR (100 MHz, CDCl<sub>3</sub>) δ = 142.8, 127.9, 127.4, 121.2, 120.9, 116.5, 42.4, 27.4, 22.2, 17.2. HR-MS (ESI): *m/z* calculated for C<sub>10</sub>H<sub>14</sub>N<sub>1</sub> [M+H<sup>+</sup>]: 148.1121, found: 148.1119.

The analytical data are consistent with those previously reported literature.<sup>9</sup>

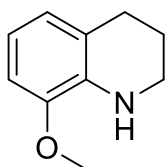

**8-Methoxy-1,2,3,4-tetrahydroquinoline (2j):** The procedure was followed using

8-methoxyquinoline (79.4  $\mu\text{L}$ , 0.5 mmol), *i*-PrOH (0.1 mL) and **Mn-1** (5.5 mg, 0.01 mmol), 120  $^{\circ}\text{C}$  for 16 h. Purification by column chromatography of Silica gel (Petroleum ether/ Ethyl acetate: 50:1 $\rightarrow$ 20:1) yielded **2j** (65.2 mg, 80%).  $^1\text{H}$  NMR (600 MHz,  $\text{CDCl}_3$ )  $\delta$  = 6.67–6.62 (m, 2H), 6.62–6.58 (m, 1H), 4.25 (s, 1H), 3.85 (s, 3H), 3.38–3.33 (m, 2H), 2.81 (t,  $J$  = 6.4 Hz, 2H), 2.01–1.95 (m, 2H).  $^{13}\text{C}$  NMR (100 MHz,  $\text{CDCl}_3$ )  $\delta$  = 146.3, 134.6, 121.8, 121.4, 115.8, 107.4, 55.4, 41.6, 26.7, 22.2. HR-MS (ESI):  $m/z$  calculated for  $\text{C}_{10}\text{H}_{14}\text{N}_1\text{O}_1$  [ $\text{M}+\text{H}^+$ ]: 164.1070, found: 164.1069.

The analytical data are consistent with those previously reported literature.<sup>14</sup>

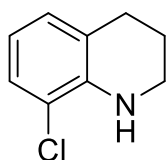

**8-Chloro-1,2,3,4-tetrahydroquinoline (2k)**: The procedure was followed using 8-chloroquinoline (64.0  $\mu\text{L}$ , 0.5 mmol), *i*-PrOH (0.1 mL) and **Mn-1** (5.5 mg, 0.01 mmol), 120  $^{\circ}\text{C}$  for 16 h. Purification by column chromatography of Silica gel (Petroleum ether/ Ethyl acetate: 100:1 $\rightarrow$ 80:1) yielded **2k** (56.1 mg, 67%).  $^1\text{H}$  NMR (400 MHz,  $\text{CDCl}_3$ )  $\delta$  = 7.11–7.04 (m, 1H), 6.90–6.83 (m, 1H), 6.52 (t,  $J$  = 7.7 Hz, 1H), 4.42 (s, 1H), 3.46–3.32 (m, 2H), 2.79 (t,  $J$  = 6.4 Hz, 2H), 2.00–1.88 (m, 2H).  $^{13}\text{C}$  NMR (151 MHz,  $\text{CDCl}_3$ )  $\delta$  = 140.7, 127.7, 126.8, 122.7, 118.0, 116.3, 41.8, 27.2, 21.7. HR-MS (ESI):  $m/z$  calculated for  $\text{C}_9\text{H}_{11}\text{Cl}_1\text{N}_1$  [ $\text{M}+\text{H}^+$ ]: 168.0575, found: 168.0572.

The analytical data are consistent with those previously reported literature.<sup>11</sup>

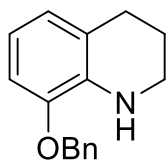

**8-(Benzyloxy)-1,2,3,4-tetrahydroquinoline (2l)**: The procedure was followed using 8-(benzyloxy)quinoline (117.7 mg, 0.5 mmol), *i*-PrOH (0.1 mL) and **Mn-1** (5.5 mg, 0.01 mmol), 120  $^{\circ}\text{C}$  for 16 h. Purification by column chromatography of Silica gel (Petroleum ether/ Ethyl acetate: 50:1 $\rightarrow$ 20:1) yielded **2l** (89.7 mg, 75%).  $^1\text{H}$  NMR

(400 MHz, CDCl<sub>3</sub>)  $\delta$  = 7.48–7.30 (m, 5H), 6.72–6.62 (m, 2H), 6.56 (t,  $J$  = 7.8 Hz, 1H), 5.06 (s, 2H), 4.30 (s, 1H), 3.37–3.29 (m, 2H), 2.80 (t,  $J$  = 6.4 Hz, 2H), 2.01–1.93 (m, 2H). <sup>13</sup>C NMR (100 MHz, CDCl<sub>3</sub>)  $\delta$  = 145.5, 137.4, 134.8, 128.6, 128.0, 127.7, 122.1, 121.6, 115.6, 108.9, 70.3, 41.5, 26.7, 22.1. HR-MS (ESI):  $m/z$  calculated for C<sub>16</sub>H<sub>18</sub>N<sub>1</sub>O<sub>1</sub> [M+H<sup>+</sup>]: 240.1383, found: 240.1380.

The analytical data are consistent with those previously reported literature.<sup>15</sup>

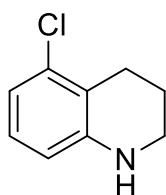

**5-Chloro-1,2,3,4-tetrahydroquinoline (2m)**: The procedure was followed using 5-chloroquinoline (81.8 mg, 0.5 mmol), *i*-PrOH (0.1 mL) and **Mn-1** (5.5 mg, 0.01 mmol), 120 °C for 16 h. Purification by column chromatography of Silica gel (Petroleum ether/ Ethyl acetate: 50:1→20:1) yielded **2m** (59.1 mg, 71%). <sup>1</sup>H NMR (400 MHz, CDCl<sub>3</sub>)  $\delta$  = 6.88 (t,  $J$  = 8.0 Hz, 1H), 6.68 (d,  $J$  = 7.8 Hz, 1H), 6.37 (d,  $J$  = 8.0 Hz, 1H), 3.94 (s, 1H), 3.31–3.21 (m, 2H), 2.79 (t,  $J$  = 6.6 Hz, 2H), 1.96–1.92 (m, 2H). <sup>13</sup>C NMR (100 MHz, CDCl<sub>3</sub>)  $\delta$  = 146.4, 134.9, 127.1, 119.2, 117.5, 112.5, 41.4, 24.7, 21.9. HR-MS (ESI):  $m/z$  calculated for C<sub>9</sub>H<sub>11</sub>Cl<sub>1</sub>N<sub>1</sub> [M+H<sup>+</sup>]: 168.0574, found: 168.0573.

The analytical data are consistent with those previously reported literature.<sup>16</sup>

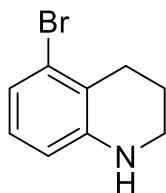

**5-Bromo-1,2,3,4-tetrahydroquinoline (2n)**: The procedure was followed using 5-bromoquinoline (104.0 mg, 0.5 mmol), *i*-PrOH (0.1 mL) and **Mn-1** (5.5 mg, 0.01 mmol), 100 °C for 24 h. Purification by column chromatography of Silica gel (Petroleum ether/ Ethyl acetate: 50:1→20:1) yielded **2n** (71.0 mg, 67%). <sup>1</sup>H NMR (400 MHz, CDCl<sub>3</sub>)  $\delta$  = 6.89–6.76 (m, 2H), 6.44–6.38 (m, 1H), 3.92 (s, 1H), 3.31–

3.17 (m, 2H), 2.76 (t,  $J = 6.6$  Hz, 2H), 2.01–1.89 (m, 2H).  $^{13}\text{C}$  NMR (100 MHz,  $\text{CDCl}_3$ )  $\delta = 146.5, 127.6, 126.0, 120.8, 120.7, 113.2, 41.5, 27.7, 22.2$ . HR-MS (ESI):  $m/z$  calculated for  $\text{C}_9\text{H}_{11}\text{Br}_1\text{N}_1$  [ $\text{M}+\text{H}^+$ ]: 212.0069, found: 212.0066.

The analytical data are consistent with those previously reported literature.<sup>12</sup>

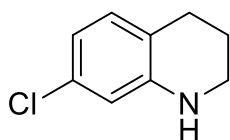

**7-Chloro-1,2,3,4-tetrahydroquinoline (2o)**: The procedure was followed using 7-chloroquinoline (67.3  $\mu\text{L}$ , 0.5 mmol), *i*-PrOH (0.1 mL) and **Mn-1** (5.5 mg, 0.01 mmol), 120 °C for 16 h. Purification by column chromatography of Silica gel (Petroleum ether/ Ethyl acetate: 50:1→20:1) yielded **2o** (81.2 mg, 97%).  $^1\text{H}$  NMR (400 MHz,  $\text{CDCl}_3$ )  $\delta = 6.89\text{--}6.77$  (m, 2H), 6.38 (d,  $J = 8.4$  Hz, 1H), 3.45 (s, 1H), 3.31–3.24 (m, 2H), 2.73 (t,  $J = 6.4$  Hz, 2H), 2.00–1.91 (m, 2H).  $^{13}\text{C}$  NMR (100 MHz,  $\text{CDCl}_3$ )  $\delta = 143.3, 129.0, 126.5, 122.9, 121.2, 115.1, 41.9, 26.9, 21.8$ . HR-MS (ESI):  $m/z$  calculated for  $\text{C}_9\text{H}_{11}\text{Cl}_1\text{N}_1$  [ $\text{M}+\text{H}^+$ ]: 168.0575, found: 168.0581.

Ethanol as hydrogen source: The procedure was followed using 7-chloroquinoline (67.3  $\mu\text{L}$ , 0.5 mmol), EtOH (0.1 mL) and **Mn-2** (6.2 mg, 0.01 mmol), 120 °C for 16 h. Purification by column chromatography of Silica gel (Petroleum ether/ Ethyl acetate: 50:1→20:1) yielded **2o** (57.8 mg, 69%).

The analytical data are consistent with those previously reported literature.<sup>17</sup>

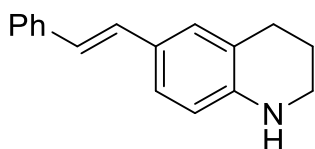

**(E)-6-Styryl-1,2,3,4-tetrahydroquinoline (2p)**: The procedure was followed using (*E*)-6-styrylquinoline (115.6 mg, 0.5 mmol), *i*-PrOH (0.1 mL) and **Mn-1** (5.5 mg, 0.01 mmol), 120 °C for 16 h. Purification by column chromatography of Silica gel (Petroleum ether/ Ethyl acetate: 50:1→20:1) yielded **2p** (94 mg, 80%).  $^1\text{H}$  NMR (400 MHz,  $\text{CDCl}_3$ )  $\delta = 7.50\text{--}7.42$  (m, 2H), 7.32 (t,  $J = 7.6$  Hz, 2H), 7.22–7.09 (m, 3H),

6.99 (d,  $J = 16.3$  Hz, 1H), 6.87 (d,  $J = 16.3$  Hz, 1H), 6.46 (d,  $J = 8.0$  Hz, 1H), 3.99 (s, 1H), 3.39–3.30 (m, 2H), 2.79 (t,  $J = 6.3$  Hz, 2H), 2.00–1.91 (m, 2H).  $^{13}\text{C}$  NMR (100 MHz,  $\text{CDCl}_3$ )  $\delta = 144.0, 138.2, 129.0, 128.6, 128.6, 127.9, 126.7, 126.0, 125.5, 124.3, 121.7, 114.5, 42.0, 27.0, 22.0$ . HR-MS (ESI):  $m/z$  calculated for  $\text{C}_{17}\text{H}_{18}\text{N}_1$  [ $\text{M}+\text{H}^+$ ]: 236.1434, found: 236.1429.

The analytical data are consistent with those previously reported literature.<sup>11</sup>

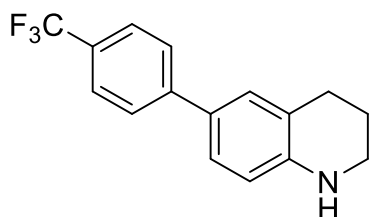

**6-(4-(Trifluoromethyl)phenyl)-1,2,3,4-tetrahydroquinoline (2q)**: The procedure was followed using 6-(4-(trifluoromethyl)phenyl)quinoline (136.6 mg, 0.5 mmol), *i*-PrOH (0.1 mL) and **Mn-1** (5.5 mg, 0.01 mmol), 120 °C for 16 h. Purification by column chromatography of Silica gel (Petroleum ether/ Ethyl acetate: 50:1→20:1) yielded **2q** (118 mg, 85%).  $^1\text{H}$  NMR (400 MHz,  $\text{CDCl}_3$ )  $\delta = 7.66\text{--}7.57$  (m, 4H), 7.25–7.21 (m, 2H), 6.55 (d,  $J = 8.0$  Hz, 1H), 4.01 (s, 1H), 3.42–3.30 (m, 2H), 2.84 (t,  $J = 6.4$  Hz, 2H), 2.02–1.94 (m, 2H).  $^{13}\text{C}$  NMR (100 MHz,  $\text{CDCl}_3$ )  $\delta = 145.1, 144.9$  (d,  $^5J_{\text{C-F}} = 1.4$  Hz), 128.3, 128.0, 127.7 (q,  $^2J_{\text{C-F}} = 32$  Hz), 125.6 (q,  $^3J_{\text{C-F}} = 4$  Hz), 124.6 (q,  $^1J_{\text{C-F}} = 270$  Hz), 126.2, 125.7, 121.6, 114.4, 41.9, 27.2, 22.0.  $^{19}\text{F}$  NMR (376 MHz,  $\text{CDCl}_3$ )  $\delta = -62.13$ . HR-MS (ESI):  $m/z$  calculated for  $\text{C}_{16}\text{H}_{15}\text{F}_3\text{N}_1$  [ $\text{M}+\text{H}^+$ ]: 278.1151, found: 278.1148.

Ethanol as hydrogen source: The procedure was followed using 6-(4-(trifluoromethyl)phenyl)quinoline (136.6 mg, 0.5 mmol), EtOH (0.1 mL, 1.71 mmol) and **Mn-2** (6.2 mg, 0.01 mmol), 120 °C for 16 h. Purification by column chromatography of Silica gel (Petroleum ether/ Ethyl acetate: 50:1→20:1) yielded **2q** (106.7 mg, 77%).

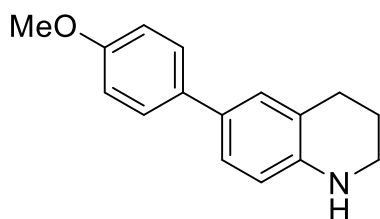

**6-(4-Methoxyphenyl)-1,2,3,4-tetrahydroquinoline (2r):** The procedure was followed using 6-(4-methoxyphenyl)quinoline (120.0 mg, 0.5 mmol), *i*-PrOH (0.1 mL) and **Mn-1** (5.5 mg, 0.01 mmol), 120 °C for 16 h. Purification by column chromatography of Silica gel (Petroleum ether/ Ethyl acetate: 40:1→10:1) yielded **2r** (74.3 mg, 62%). <sup>1</sup>H NMR (400 MHz, CDCl<sub>3</sub>) δ = 7.47–7.42 (m, 2H), 7.20–7.14 (m, 2H), 6.95–6.90 (m, 2H), 6.53 (d, *J* = 7.9 Hz, 1H), 3.83 (s, 3H), 3.39–3.29 (m, 2H), 2.82 (t, *J* = 6.4 Hz, 2H), 2.01–1.93 (m, 2H). <sup>13</sup>C NMR (100 MHz, CDCl<sub>3</sub>) δ = 158.2, 143.8, 134.3, 129.8, 127.8, 127.3, 125.2, 121.7, 114.5, 114.1, 55.3, 42.1, 27.1, 22.3. HR-MS (ESI): *m/z* calculated for C<sub>16</sub>H<sub>18</sub>N<sub>1</sub>O<sub>1</sub> [M+H<sup>+</sup>]: 240.1383, found: 240.1378. The analytical data are consistent with those previously reported literature.<sup>18</sup>

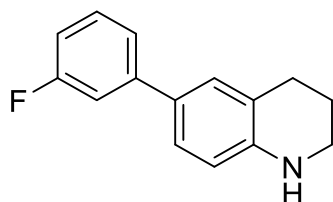

**6-(3-Fluorophenyl)-1,2,3,4-tetrahydroquinoline (2s):** The procedure was followed using 6-(3-fluorophenyl)quinoline (111.6 mg, 0.5 mmol), *i*-PrOH (0.1 mL) and **Mn-1** (5.5 mg, 0.01 mmol), 120 °C for 16 h. Purification by column chromatography of Silica gel (Petroleum ether/ Ethyl acetate: 50:1→20:1) yielded **2s** (97.4 mg, 87%). <sup>1</sup>H NMR (400 MHz, CDCl<sub>3</sub>) δ = 7.35–7.26 (m, 2H), 7.24–7.14 (m, 3H), 6.94–6.87 (m, 1H), 6.49 (d, *J* = 7.9 Hz, 1H), 3.68 (s, 1H), 3.35–3.26 (m, 2H), 2.80 (t, *J* = 6.4 Hz, 2H), 1.98–1.90 (m, 2H). <sup>13</sup>C NMR (100 MHz, CDCl<sub>3</sub>) δ = 163.3 (d, <sup>1</sup>*J*<sub>C-F</sub> = 245 Hz), 144.8, 143.9 (d, <sup>3</sup>*J*<sub>C-F</sub> = 8 Hz), 130.0 (d, <sup>3</sup>*J*<sub>C-F</sub> = 9 Hz), 128.4 (d, <sup>4</sup>*J*<sub>C-F</sub> = 2.2 Hz), 128.1, 125.5, 121.7 (d, <sup>4</sup>*J*<sub>C-F</sub> = 2.5 Hz), 121.6, 114.4, 112.9 (d, <sup>2</sup>*J*<sub>C-F</sub> = 22 Hz), 112.5 (d, <sup>2</sup>*J*<sub>C-F</sub> = 21 Hz), 42.0, 27.2, 22.1. <sup>19</sup>F NMR (376 MHz, CDCl<sub>3</sub>) δ = -113.61. HR-MS (ESI): *m/z* calculated for C<sub>15</sub>H<sub>15</sub>F<sub>1</sub>N<sub>1</sub> [M+H<sup>+</sup>]: 228.1183, found: 228.1179.

Ethanol as hydrogen source: The procedure was followed using 6-(3-fluorophenyl)quinoline (111.6 mg, 0.5 mmol), EtOH (0.1 mL) and **Mn-2** (6.2 mg, 0.01 mmol), 120 °C for 16 h. Purification by column chromatography of Silica gel (Petroleum ether/ Ethyl acetate: 50:1→20:1) yielded **2s** (73.9 mg, 65%).

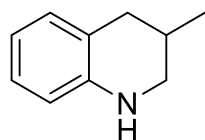

**3-Methyl-1,2,3,4-tetrahydroquinoline (2t)**: The procedure was followed using 3-methylquinoline (67  $\mu$ L, 0.5 mmol), *i*-PrOH (0.1 mL), and **Mn-1** (8.25 mg, 0.015 mmol), 120 °C for 24 h. Purification by column chromatography of Silica gel (Petroleum ether/ Ethyl acetate: 50:1→20:1) yielded **2t** (42.6 mg, 58%). <sup>1</sup>H NMR (400 MHz, CDCl<sub>3</sub>)  $\delta$  = 7.05–6.95 (m, 2H), 6.65 (t, *J* = 7.3 Hz, 1H), 6.51 (d, *J* = 7.9 Hz, 1H), 3.71 (s, 1H), 3.34–3.26 (m, 1H), 2.97–2.89 (m, 1H), 2.82 (dd, *J* = 16.0, 3.7 Hz, 1H), 2.47 (dd, *J* = 16.0, 10.3 Hz, 1H), 2.16–2.03 (m, 1H), 1.09 (d, *J* = 6.7 Hz, 3H). <sup>13</sup>C NMR (100 MHz, CDCl<sub>3</sub>)  $\delta$  = 144.4, 129.6, 126.8, 121.2, 117.0, 113.9, 48.9, 35.5, 27.2, 19.1. HR-MS (ESI): *m/z* calculated for C<sub>10</sub>H<sub>14</sub>N<sub>1</sub> [M+H<sup>+</sup>]: 148.1121, found: 148.1119.

The analytical data are consistent with those previously reported literature.<sup>9</sup>

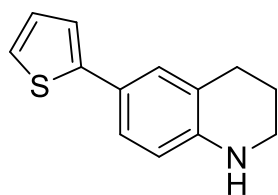

**6-(Thiophen-2-yl)-1,2,3,4-tetrahydroquinoline (2u)**: The procedure was followed using 6-(thiophen-2-yl)quinoline (105.7 mg, 0.5 mmol), *i*-PrOH (0.1 mL) and **Mn-1** (5.5 mg, 0.01 mmol), 120 °C for 16 h. Purification by column chromatography of Silica gel (Petroleum ether/ Ethyl acetate: 50:1→20:1) yielded **2u** (105.6 mg, 98%). <sup>1</sup>H NMR (400 MHz, CDCl<sub>3</sub>)  $\delta$  = 7.28–7.20 (m, 2H), 7.17–7.10 (m, 2H), 7.06–7.00 (m, 1H), 6.44 (d, *J* = 8.0 Hz, 1H), 3.68 (s, 1H), 3.31–3.26 (m, 2H), 2.79 (t, *J* = 6.4 Hz, 2H), 1.98–1.90 (m, 2H). <sup>13</sup>C NMR (100 MHz, CDCl<sub>3</sub>)  $\delta$  = 145.6, 144.2, 127.8,



127.3, 124.8, 123.7, 122.6, 121.7, 120.8, 114.4, 42.0, 27.0, 22.0. HR-MS (ESI):  $m/z$  calculated for  $C_{13}H_{14}N_1S_1$  [ $M+H^+$ ]: 216.0841, found: 216.0839.

Ethanol as hydrogen source: The procedure was followed using 6-(thiophen-2-yl)quinoline (105.7 mg, 0.5 mmol), EtOH (0.1 mL) and **Mn-2** (6.2 mg, 0.01 mmol), 120 °C for 16 h. Purification by column chromatography of Silica gel (Petroleum ether/ Ethyl acetate: 50:1→20:1) yielded **2u** (82.9 mg, 77%).

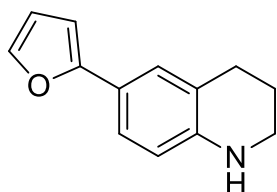

**6-(Furan-2-yl)-1,2,3,4-tetrahydroquinoline (2v)**: The procedure was followed using 6-(furan-2-yl)quinoline (97.7 mg, 0.5 mmol), *i*-PrOH (0.1 mL) and **Mn-1** (5.5 mg, 0.01 mmol), 120 °C for 16 h. Purification by column chromatography of Silica gel (Petroleum ether/ Ethyl acetate: 50:1→20:1) yielded **2v** (95.3 mg, 96%).  $^1H$  NMR (400 MHz,  $CDCl_3$ )  $\delta$  = 7.41–7.13 (m, 3H), 6.47–6.28 (m, 3H), 3.61 (s, 1H), 3.28–3.19 (m, 2H), 2.74 (t,  $J$  = 6.3 Hz, 2H), 1.94–1.83 (m, 2H).  $^{13}C$  NMR (100 MHz,  $CDCl_3$ )  $\delta$  = 155.1, 144.4, 140.6, 125.3, 122.9, 121.3, 120.3, 114.2, 111.5, 101.8, 42.0, 27.1, 22.1. HR-MS (ESI):  $m/z$  calculated for  $C_{13}H_{14}N_1O_1$  [ $M+H^+$ ]: 200.1070, found: 200.1068.

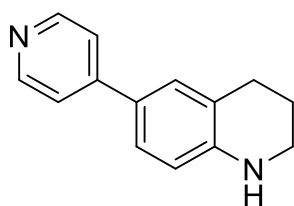

**6-(Pyridin-4-yl)-1,2,3,4-tetrahydroquinoline (2w)**: The procedure was followed using 6-(pyridin-4-yl)quinoline (103.1 mg, 0.5 mmol), *i*-PrOH (0.1 mL) and **Mn-1** (8.25 mg, 0.015 mmol), 120 °C for 24 h. Purification by column chromatography of Silica gel (Petroleum ether/ Ethyl acetate: 5:1→1:1) yielded **2w** (71.3 mg, 68%).  $^1H$  NMR (400 MHz,  $CDCl_3$ )  $\delta$  = 8.64–8.47 (m, 2H), 7.48–7.39 (m, 2H), 7.33–7.25 (m, 2H), 6.54 (d,  $J$  = 8.1 Hz, 1H), 4.09 (s, 1H), 3.42–3.30 (m, 2H), 2.83 (t,  $J$  = 6.3 Hz,

2H), 2.02–1.93 (m, 2H).  $^{13}\text{C}$  NMR (100 MHz,  $\text{CDCl}_3$ )  $\delta$  = 149.8, 148.5, 146.0, 128.0, 125.6, 125.5, 121.5, 120.3, 114.2, 41.9, 27.1, 21.8. HR-MS (ESI):  $m/z$  calculated for  $\text{C}_{14}\text{H}_{15}\text{N}_2$  [ $\text{M}+\text{H}^+$ ]: 211.1230, found: 211.1227.

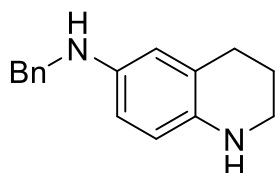

***N*-benzyl-1,2,3,4-tetrahydroquinolin-6-amine (2x)**: The procedure was followed using *N*-benzylquinolin-6-amine (117.1 mg, 0.5 mmol), *i*-PrOH (0.1 mL) and **Mn-1** (5.5 mg, 0.01 mmol), 120 °C for 16 h. Purification by column chromatography of Silica gel (Petroleum ether/ Ethyl acetate/ Triethylamine: 10:1:0.1→6:3:0.1) yielded **2x** (64.3 mg, 54%).  $^1\text{H}$  NMR (400 MHz,  $\text{DMSO}-d_6$ )  $\delta$  = 7.38–7.26 (m, 4H), 7.23–7.17 (m, 1H), 6.36–6.12 (m, 3H), 4.98 (s, 2H), 4.31–3.93 (m, 2H), 3.21–2.86 (m, 2H), 2.65–2.45 (m, 2H), 1.77–1.68 (m, 2H).  $^{13}\text{C}$  NMR (100 MHz,  $\text{DMSO}-d_6$ )  $\delta$  = 141.6, 140.2, 137.3, 128.6, 127.7, 126.9, 121.7, 115.6, 114.3, 112.6, 48.2, 42.0, 27.4, 22.9. HR-MS (ESI):  $m/z$  calculated for  $\text{C}_{16}\text{H}_{17}\text{N}_2$  [ $\text{M}^+$ ]: 237.1386, found: 237.1382.

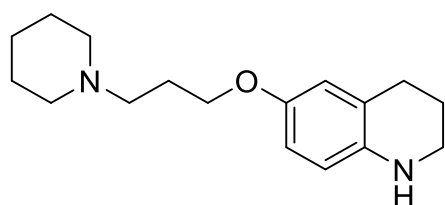

**6-(3-(Piperidin-1-yl)propoxy)-1,2,3,4-tetrahydroquinoline (2y)**: The procedure was followed using 6-(3-(piperidin-1-yl)propoxy)quinoline (135.2 mg, 0.5 mmol), *i*-PrOH (0.1 mL) and **Mn-1** (5.5 mg, 0.01 mmol), 120 °C for 16 h. Purification by column chromatography of Silica gel (Petroleum ether/ Ethyl acetate/ Triethylamine: 8:2:0.2→7:3:0.2) yielded **2y** (84.9mg, 62%).  $^1\text{H}$  NMR (400 MHz,  $\text{CDCl}_3$ )  $\delta$  = 6.61–6.51 (m, 2H), 6.45–6.39 (m, 1H), 3.90 (t,  $J$  = 6.4 Hz, 2H), 3.57 (s, 1H), 3.27–3.19 (m, 2H), 2.73 (t,  $J$  = 6.5 Hz, 2H), 2.50–2.32 (m, 6H), 1.97–1.85 (m, 4H), 1.63–1.53 (m, 4H), 1.43 (q,  $J$  = 5.6, 5.2 Hz, 2H).  $^{13}\text{C}$  NMR (100 MHz,  $\text{CDCl}_3$ )  $\delta$  = 151.2, 138.9, 122.9, 115.9, 115.5, 113.8, 67.3, 56.2, 54.6, 42.4, 27.2, 27.0, 26.0, 24.5, 22.5. HR-MS

(ESI):  $m/z$  calculated for  $C_{17}H_{27}N_2O_1$  [ $M+H^+$ ]: 275.2118, found: 275.2114.

The analytical data are consistent with those previously reported literature.<sup>5</sup>

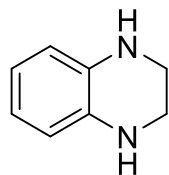

**1,2,3,4-Tetrahydroquinoxaline (4a)**: The procedure was followed using quinoxaline (65.5 mg, 0.5 mmol), *i*-PrOH (0.1 mL) and **Mn-1** (5.5 mg, 0.01 mmol), 120 °C for 16 h. Purification by column chromatography of Silica gel (Petroleum ether/ Ethyl acetate: 50:1→20:1) yielded **4a** (50.6 mg, 75%). <sup>1</sup>H NMR (400 MHz, CDCl<sub>3</sub>)  $\delta$  = 6.61–6.56 (m, 2H), 6.52–6.47 (m, 2H), 3.42 (s, 4H), 3.06 (s, 2H). <sup>13</sup>C NMR (100 MHz, CDCl<sub>3</sub>)  $\delta$  = 133.6, 118.9, 114.8, 41.4. HR-MS (ESI):  $m/z$  calculated for  $C_8H_{11}N_2$  [ $M+H^+$ ]: 135.0917, found: 135.0916.

The analytical data are consistent with those previously reported literature.<sup>11</sup>

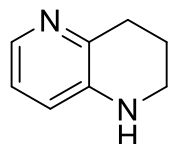

**1,2,3,4-Tetrahydro-1,5-naphthyridine (4b)**: The procedure was followed using 1,5-naphthyridine (65.1 mg, 0.5 mmol), *i*-PrOH (0.1 mL) and **Mn-1** (5.5 mg, 0.01 mmol), 120 °C for 16 h. Purification by column chromatography of Silica gel (Petroleum ether/ Ethyl acetate: 40:1→10:1) yielded **4b** (47.4 mg, 74%). <sup>1</sup>H NMR (400 MHz, CDCl<sub>3</sub>)  $\delta$  = 7.85 (dd,  $J$  = 4.7, 1.2 Hz, 1H), 6.88 (dd,  $J$  = 8.0, 4.7 Hz, 1H), 6.72 (dd,  $J$  = 8.0, 1.3 Hz, 1H), 3.81 (s, 1H), 3.34–3.25 (m, 2H), 2.93 (t,  $J$  = 6.5 Hz, 2H), 2.05–1.97 (m, 2H). <sup>13</sup>C NMR (100 MHz, CDCl<sub>3</sub>)  $\delta$  = 142.7, 141.0, 137.9, 121.9, 120.3, 41.5, 30.3, 21.8. HR-MS (ESI):  $m/z$  calculated for  $C_8H_{11}N_2$  [ $M+H^+$ ]: 135.0917, found: 135.0915.

Ethanol as hydrogen source: The procedure was followed using 1,5-naphthyridine (65.1 mg, 0.5 mmol), EtOH (0.1 mL) and **Mn-2** (6.2 mg, 0.01 mmol), 120 °C for 16 h. Purification by column chromatography of Silica gel (Petroleum ether/ Ethyl acetate:

50:1→20:1) yielded **4b** (48.2 mg, 72%).

The analytical data are consistent with those previously reported literature.<sup>11</sup>

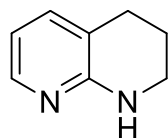

**1,2,3,4-Tetrahydro-1,8-naphthyridine (4c)**: The procedure was followed using 1,8-naphthyridine (65.1 mg, 0.5 mmol), *i*-PrOH (0.1 mL) and **Mn-1** (5.5 mg, 0.01 mmol), 120 °C for 16 h. Purification by column chromatography of Silica gel (Petroleum ether/ Ethyl acetate: 10:1→2:1) yielded **4c** (47.4 mg, 71%). <sup>1</sup>H NMR (400 MHz, CDCl<sub>3</sub>)  $\delta$  = 7.87–7.80 (m, 1H), 7.14–7.08 (m, 1H), 6.49–6.42 (m, 1H), 4.99 (s, 1H), 3.43–3.35 (m, 2H), 2.70 (t, *J* = 6.3 Hz, 2H), 1.94–1.86 (m, 2H). <sup>13</sup>C NMR (100 MHz, CDCl<sub>3</sub>)  $\delta$  = 156.3, 145.8, 136.2, 116.1, 112.5, 41.5, 26.7, 21.3. HR-MS (ESI): *m/z* calculated for C<sub>8</sub>H<sub>11</sub>N<sub>2</sub> [M+H<sup>+</sup>]: 135.0917, found: 135.0916.

The analytical data are consistent with those previously reported literature.<sup>12</sup>

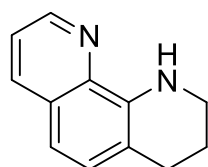

**1,2,3,4-Tetrahydro-1,10-phenanthroline (4d)**: The procedure was followed using 1,10-phenanthroline (90.1 mg, 0.5 mmol), *i*-PrOH (0.1 mL) and **Mn-1** (5.5 mg, 0.01 mmol), 120 °C for 16 h. Purification by column chromatography of Silica gel (Petroleum ether/ Ethyl acetate: 50:1→20:1) yielded **4d** (85.6 mg, 93%). <sup>1</sup>H NMR (600 MHz, CDCl<sub>3</sub>)  $\delta$  = 8.69 (dd, *J* = 4.2, 1.7 Hz, 1H), 8.00 (dd, *J* = 8.3, 1.7 Hz, 1H), 7.29 (dd, *J* = 8.2, 4.2 Hz, 1H), 7.17 (d, *J* = 8.2 Hz, 1H), 6.98 (d, *J* = 8.2 Hz, 1H), 5.96 (s, 1H), 3.58–3.46 (m, 2H), 2.93 (t, *J* = 6.4 Hz, 2H), 2.04–1.95 (m, 2H). <sup>13</sup>C NMR (100 MHz, CDCl<sub>3</sub>)  $\delta$  = 146.9, 140.7, 137.5, 135.9, 129.1, 127.4, 120.6, 116.6, 113.1, 41.3, 27.1, 21.9. HR-MS (ESI): *m/z* calculated for C<sub>12</sub>H<sub>13</sub>N<sub>2</sub> [M+H<sup>+</sup>]: 185.1073, found: 185.1071.

Ethanol as hydrogen source: The procedure was followed using 1,10-phenanthroline

(90.1 mg, 0.5 mmol), EtOH (0.1 mL) and **Mn-2** (6.2 mg, 0.01 mmol), 120 °C for 16 h. Purification by column chromatography of Silica gel (Petroleum ether/ Ethyl acetate: 50:1→20:1) yielded **4d** (74.3 mg, 81%).

The analytical data are consistent with those previously reported literature.<sup>12</sup>

## Experimental mechanistic studies

### Transfer hydrogenation of **1a** with D<sub>8</sub>-*i*-PrOH

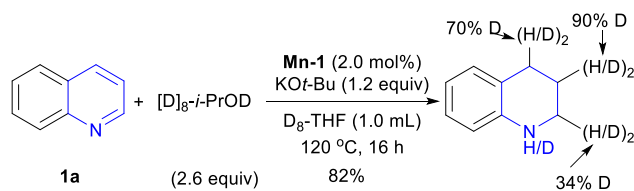

In glove box, a Schlenk sealed pressure tube (10.0 mL) containing a stirring bar was sequentially charged with **Mn-1** (2.0 mol%), KO*t*-Bu (0.6 mmol, 1.2 equiv.), D<sub>8</sub>-THF (1.0 mL), **1a** (0.5 mmol, 1.0 equiv.) and D<sub>8</sub>-*i*-Propanol (0.1 mL). Then the pressure tube was placed into a preheated aluminum block for 16 h. After the tube was cooled to ambient temperature, the reaction mixture was diluted with DCM (3.0 mL). The reaction mixture was purified by silica gel column chromatography to give the corresponding products.

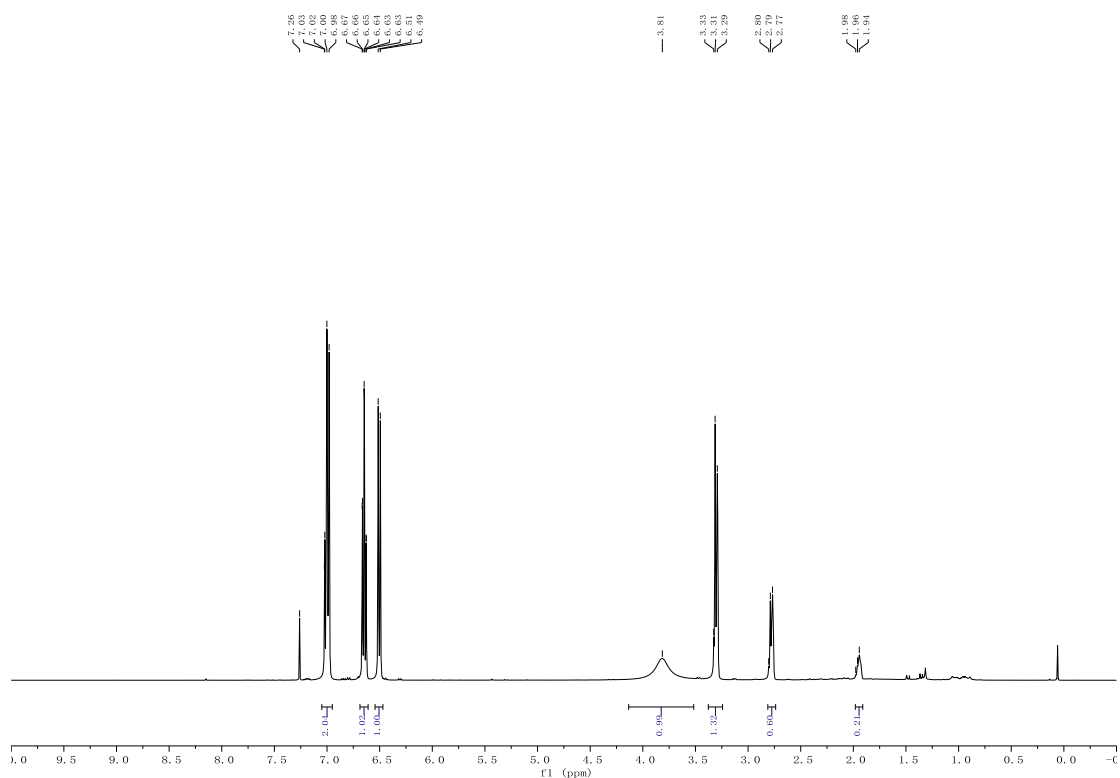

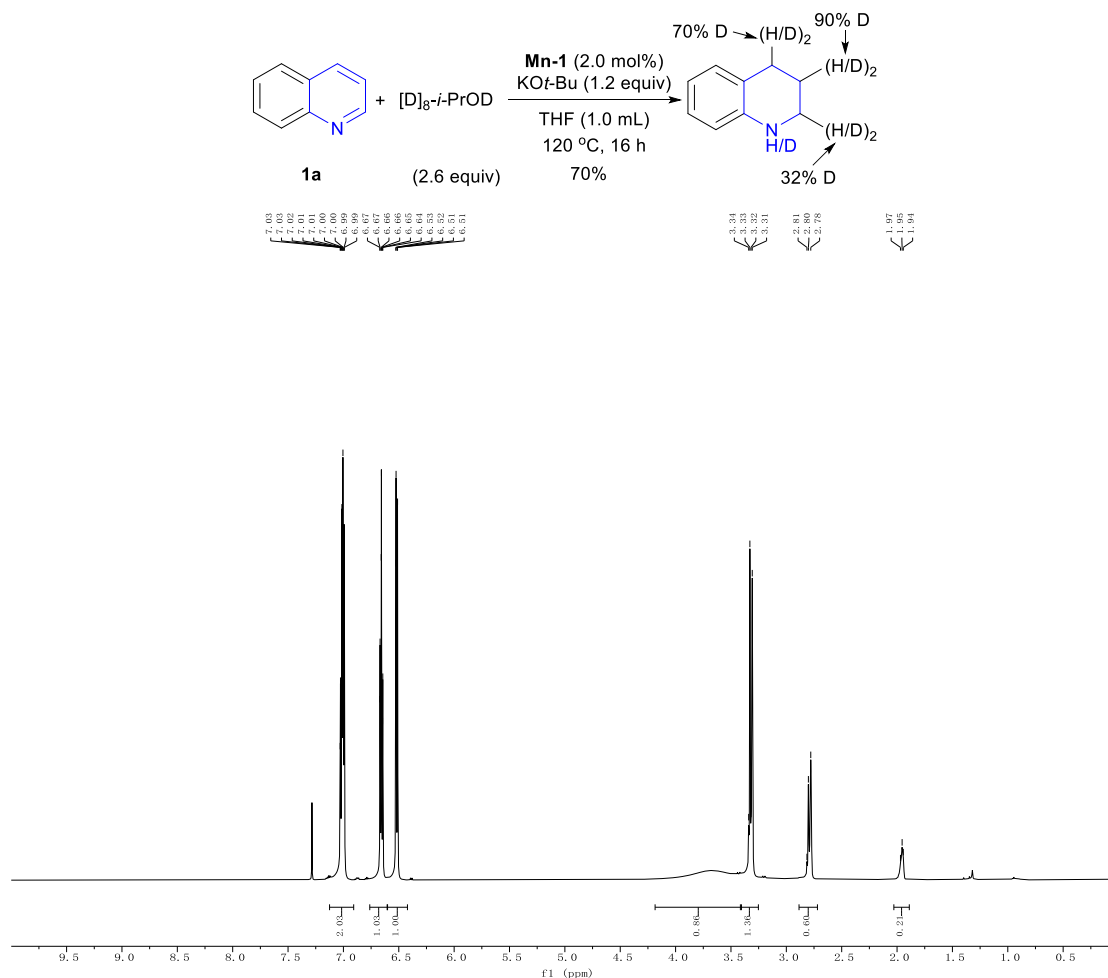

### Transfer hydrogenation of 1,2-dihydroquinoline with $D_8$ -*i*-PrOH

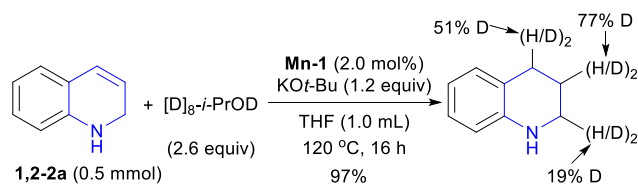

The procedure was followed using **1,2-2a** (65.5 mg, 0.5 mmol),  $D_8$ -*i*-PrOH (0.1 mL) and **Mn-1** (5.5 mg, 0.01 mmol), 120 °C for 16 h. Purification by column chromatography of Silica gel (Petroleum ether/ Ethyl acetate: 80:1→40:1) yielded **2a** (65.5 mg, 97%).

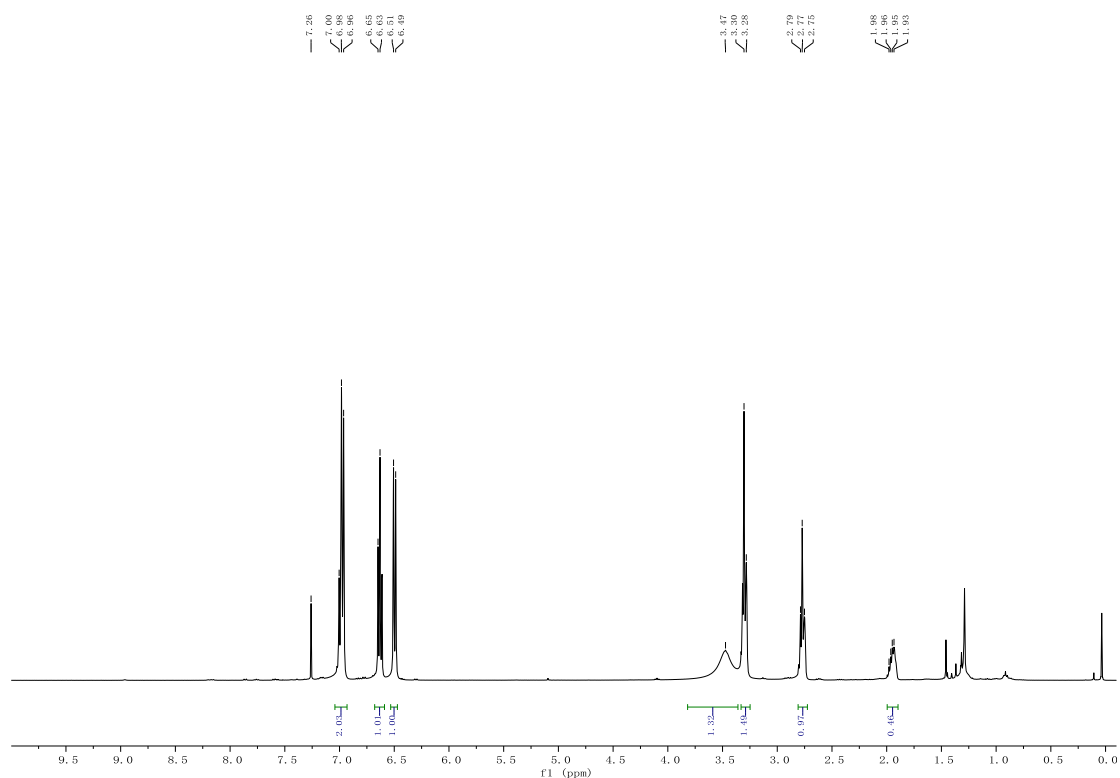

### Transfer hydrogenation of 1,2-dihydroquinoline with *i*-PrOH

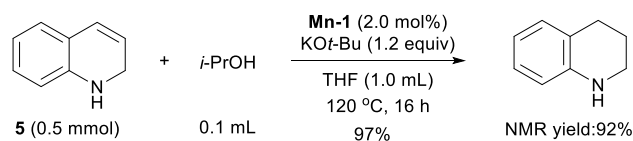

The procedure was followed using **1,2-2a** (65.5 mg, 0.5 mmol), *i*-PrOH (0.1 mL) and **Mn-1** (5.5 mg, 0.01 mmol), 120 °C for 16 h. The yield of **2a** was determined to be 92% by <sup>1</sup>H-NMR using CH<sub>2</sub>Br<sub>2</sub> as internal standard.

### Determination of [MnH]-2<sub>2</sub>K

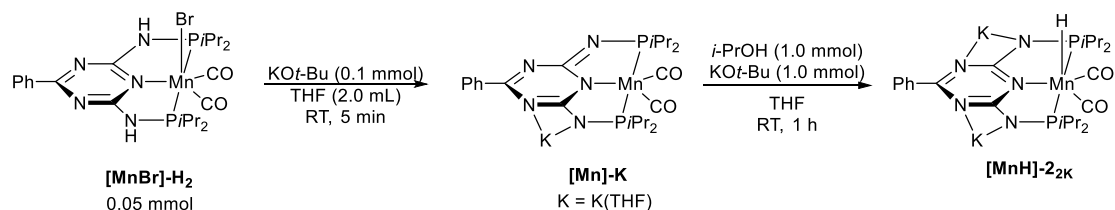

In glove box, a Schlenk sealed pressure tube (10.0 mL) containing a stirring bar was sequentially charged with **Mn-2** (31 mg, 0.05 mmol), KO*t*-Bu (11.2 mg, 0.1 mmol) and THF (2.0 mL). After generating the catalyst, an aliquot of the solution was transferred into a NMR-tube equipped with DMSO-*d*<sub>6</sub>, and a <sup>31</sup>P NMR experiment



was conducted. Afterwards, *i*-PrOH (1.0 mmol) and KO*t*-Bu (112 mg, 1.0 mmol) was added to the reaction tube. The reaction mixture was stirred for one hour at room temperature. A color change from green to red could be observed. After the reaction time the red solution was transferred into a NMR-tube equipped with DMSO- $d_6$ ,  $^{31}\text{P}$  NMR and  $^1\text{H}$  NMR experiment was conducted.

123.96

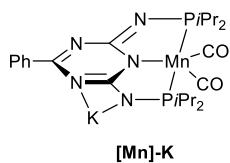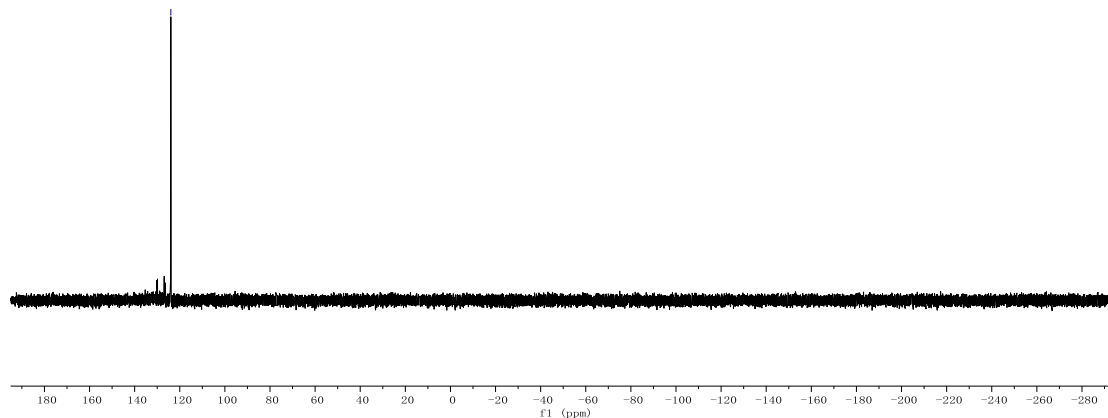

151.19

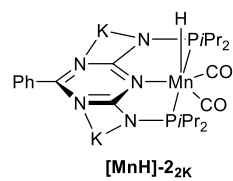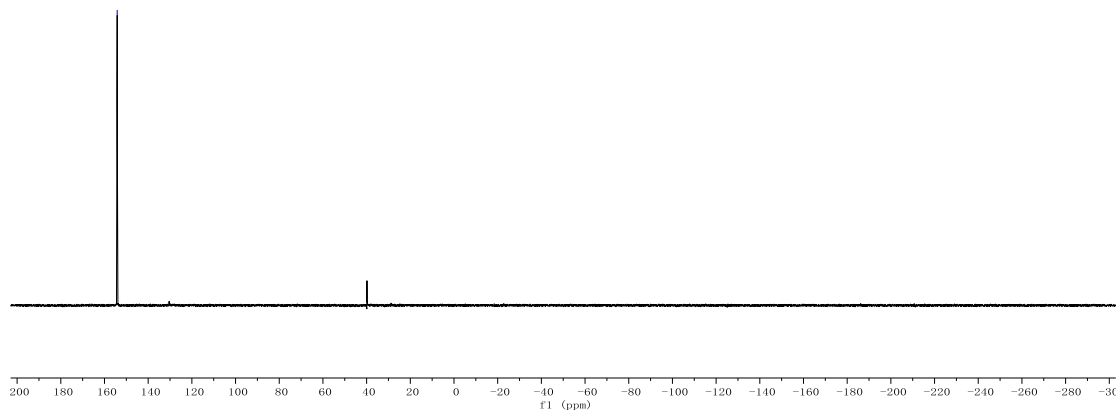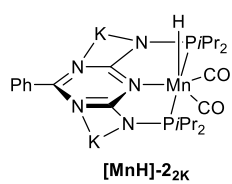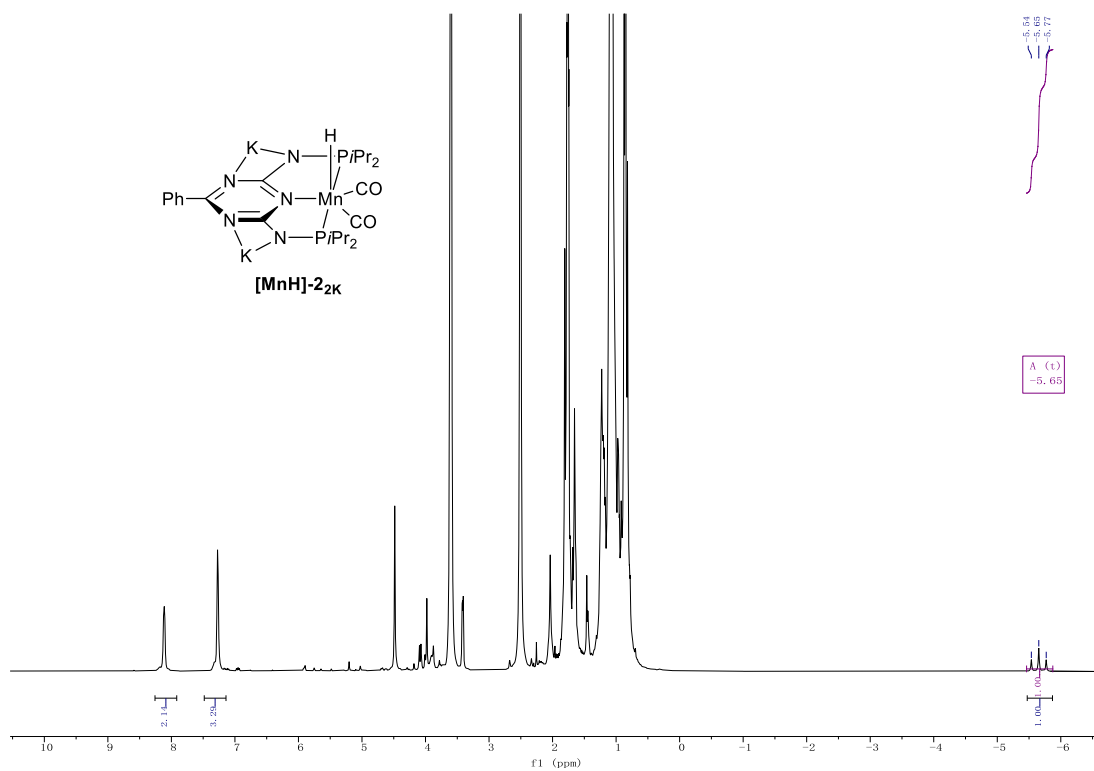

## Transfer hydrogenation of 1,2,3,4-tetrahydro-1,10-phenanthroline

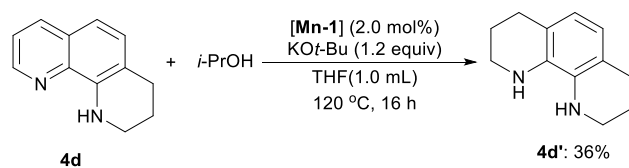

**1,2,3,4,7,8,9,10-octahydro-1,10-phenanthroline (4d')**: The procedure was followed using 1,2,3,4-tetrahydro-1,10-phenanthroline (0.4 mmol), *KOt*-Bu (0.48 mmol), *i*-PrOH (0.08 mL) and **Mn-1** (4.4mg, 0.008 mmol), 120 °C for 16 h. Purification by column chromatography of Silica gel (Petroleum ether/ Ethyl acetate: 50:1→20:1) yielded **4d'** (27.8 mg, 37%). <sup>1</sup>H NMR (600 MHz, CDCl<sub>3</sub>) δ = 6.47 (s, 2H), 3.39–3.26 (m, 4H), 3.58–3.10(m, 2H), 2.75 (t, *J* = 6.3 Hz, 4H), 1.95–1.86 (m, 4H). <sup>13</sup>C NMR (150 MHz, CDCl<sub>3</sub>) δ = 132.9, 120.5, 119.2, 42.7, 27.0, 22.6. GC-MS *m/z* (relative intensity): 188 (100) [*M*<sup>+</sup>], 189 (13), 187 (40), 160 (14), 159 (29). The analytical data are consistent with those previously reported literature.<sup>19</sup>

## Proposed mechanism cycle

Based on the experimental and DFT calculation studies, a mechanism for the Mn-catalysed transfer hydrogenation of quinoline (**1a**) was proposed (Scheme S1). The catalytically active species **MnH-1<sub>2</sub>K** was generated in the presence of KO $t$ -Bu and *i*-PrOH. Subsequently, hydride transfer from **MnH-1<sub>2</sub>K** to the carbon of **1a** via nucleophilic attack, and then protonation of hydroquinoline anion intermediates by *i*-PrOH result in the formation of dihydroquinolines. The active species **MnH-1<sub>2</sub>K** was regenerated through releasing acetone from **Mn-O $t$ Pr**. Due to the free energy barrier for catalyst regeneration is higher than that of 1,2-, 3,4- and 1,4-dihydroquinoline formation, the isomerization of among these three dihydroquinolines can be occurred before catalyst regeneration. Once the intermediate 3,4-dihydroquinoline (**3,4-2a**) was formed, it is easily hydrogenated to furnish **2a** via an outer sphere hydrogen-transfer manner.

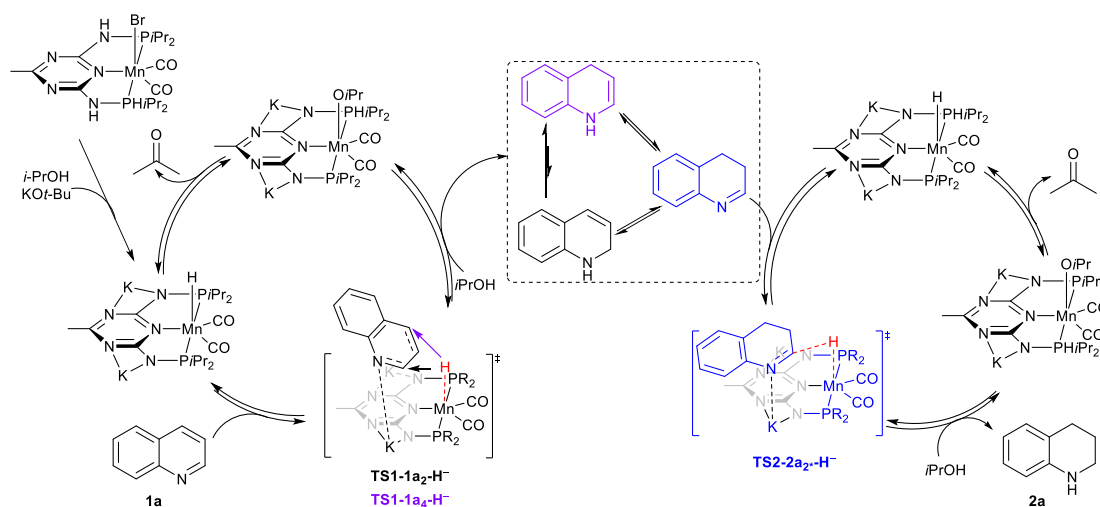

**Scheme S1.** Proposed mechanism cycle for manganese catalysed transfer hydrogenation of quinoline (**1a**)

## DFT Calculations

Density functional theory calculations were performed with Gaussian 16 program<sup>20</sup> by using quinoline (**1a**) as model substrate and *i*PrOH as the hydrogen source. Herein, geometry optimizations and frequency calculations were performed at the M06L/def2-SVP<sup>21</sup> level. All optimized structures were characterized either as energy minimums without imaginary frequencies or transition states with only one imaginary mode, and the imaginary model connects the initial and the final states. The thermal correction to Gibbs free energy at 298 K from the frequency analysis was added to the total electronic energy calculated at M06L-SCRF(SMD)/def2-TZVP<sup>21b, 21c</sup> level under the consideration of solvation effect by using SMD solvation model<sup>22</sup> and THF as solvent.

## Gibbs free energy profiles for Mn-5 as catalyst

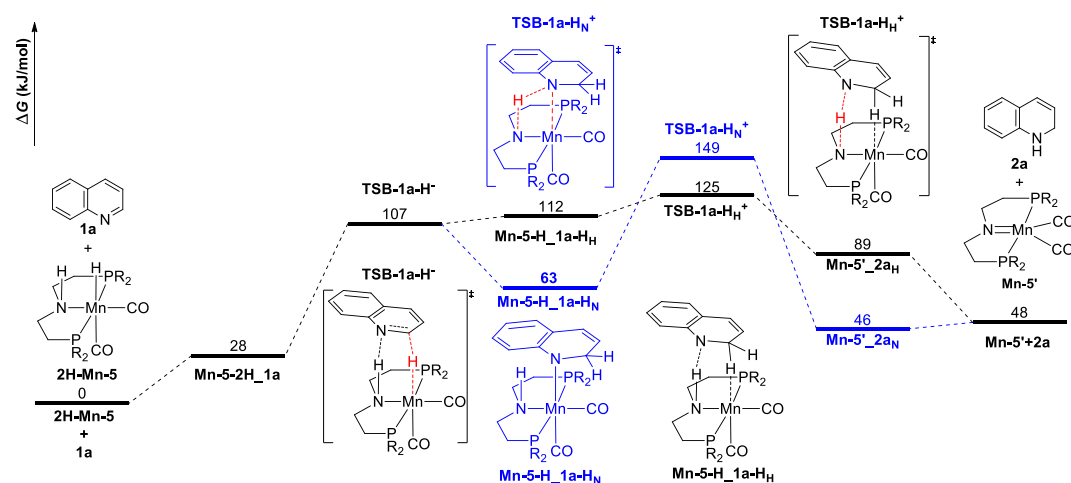

**Figure S1.** Gibbs free energy profile for amine complex of **2H-Mn-5** catalyzed quinoline (**1a**) hydrogenation to 1,2-dihydroquinoline (**2a**) and amido complex **Mn-5'** (R = *i*Pr)

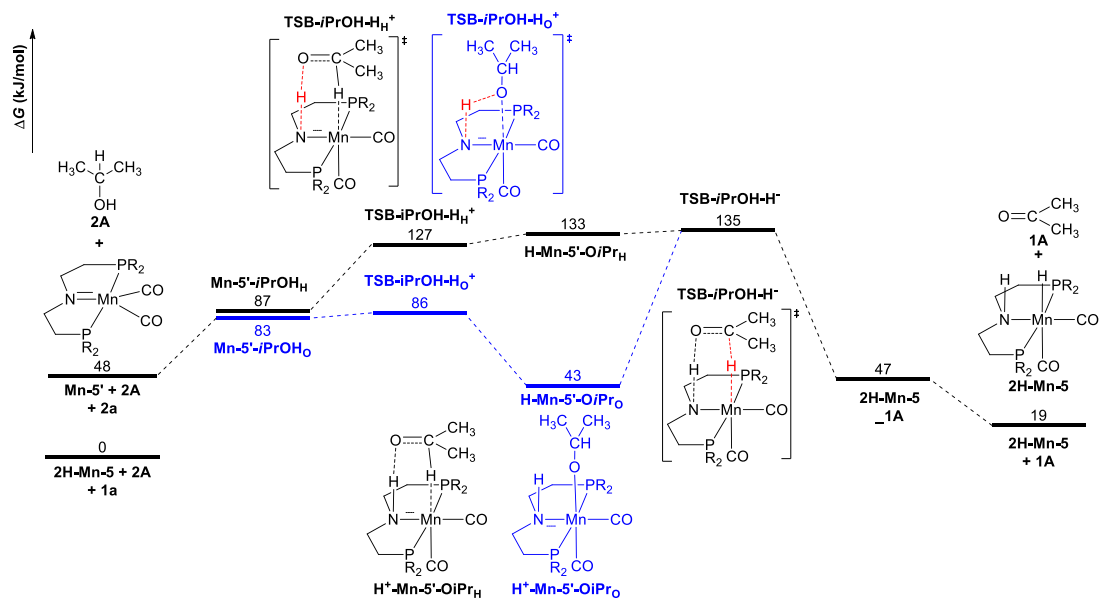

**Figure S2.** Gibbs free energy profile for dehydrogenation *i*-PrOH and regeneration of **2H-Mn-5** ( $R = i\text{Pr}$ )

### NMR Spectra:

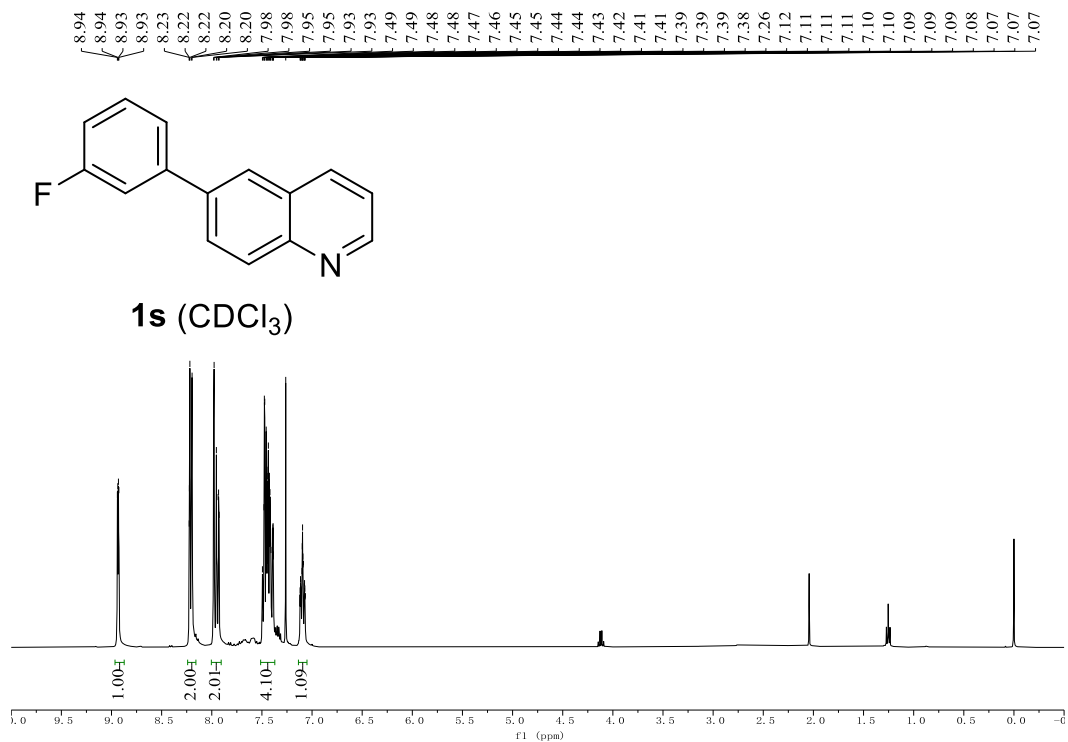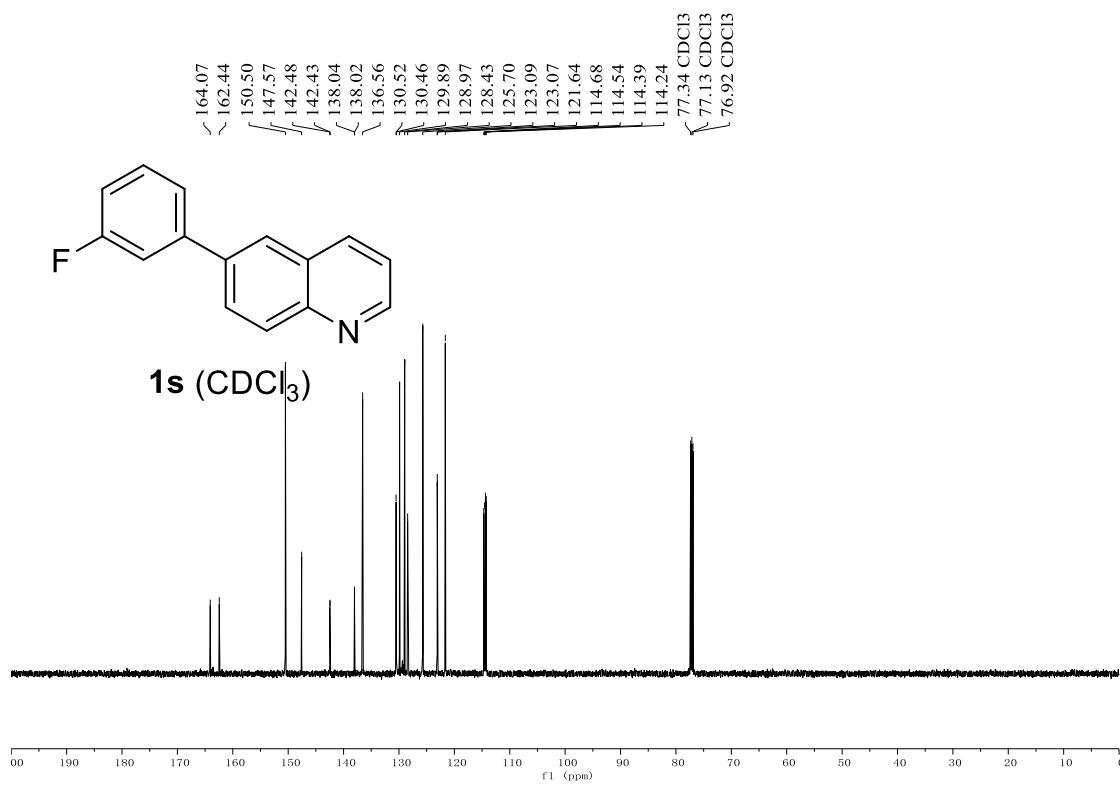

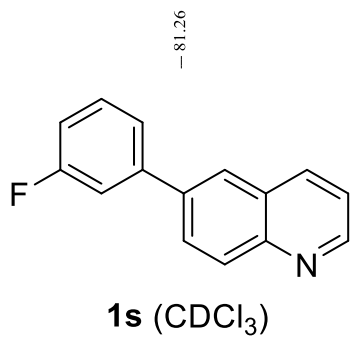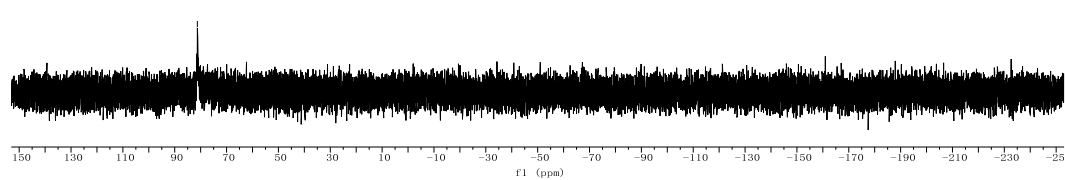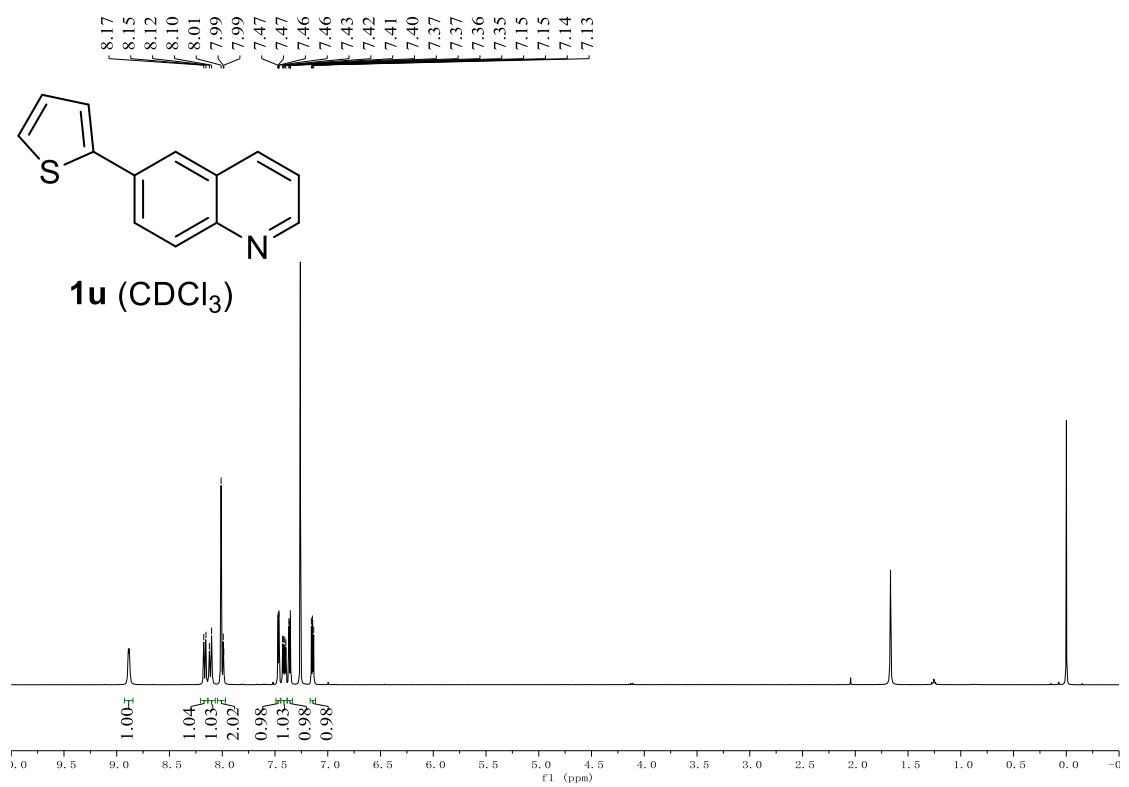



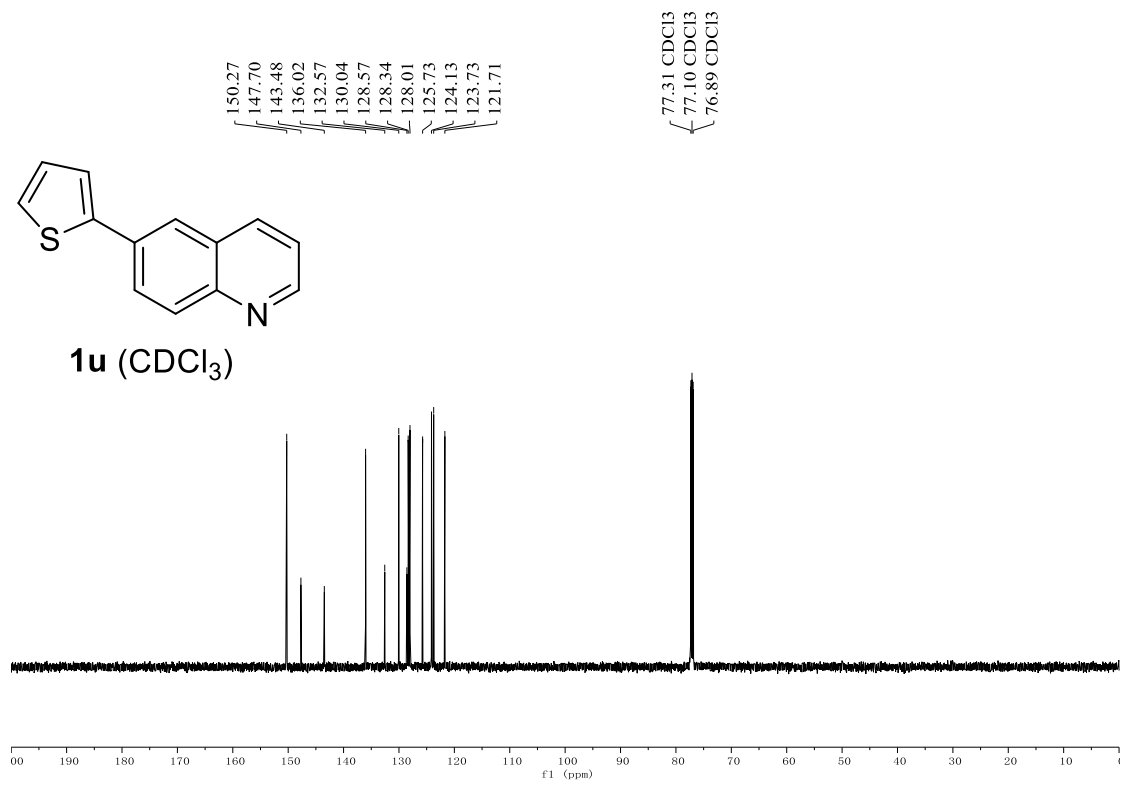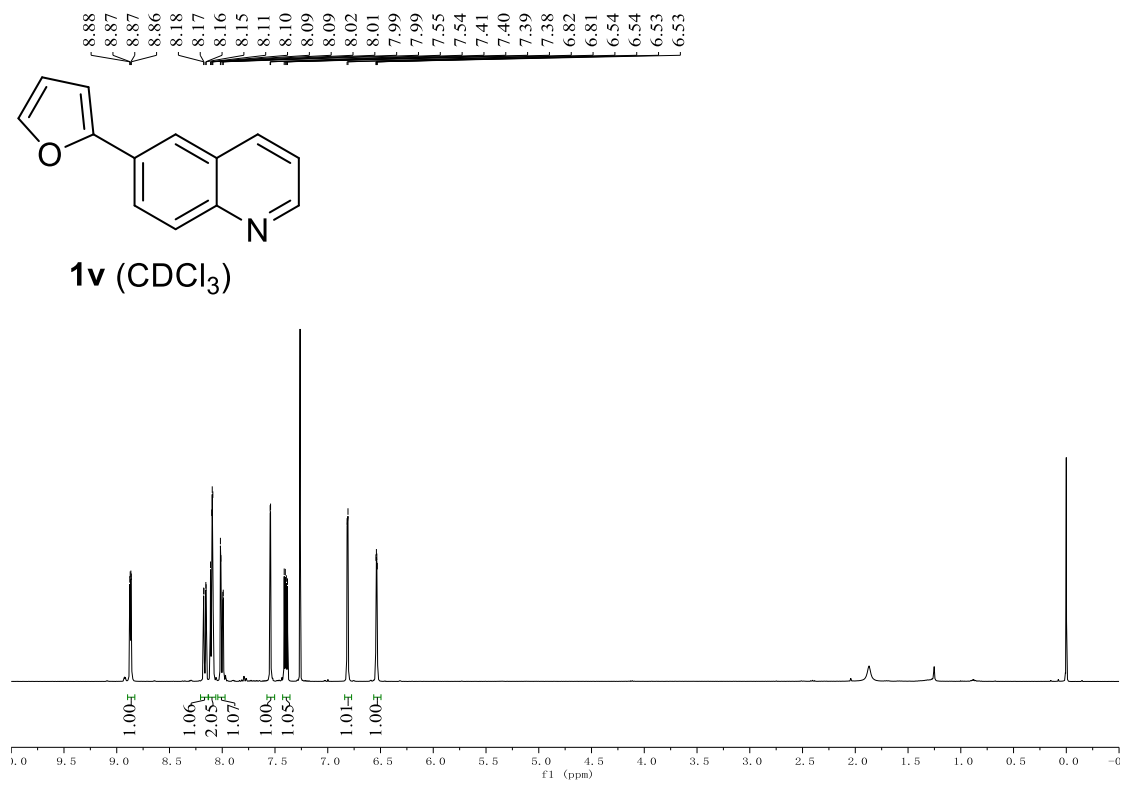

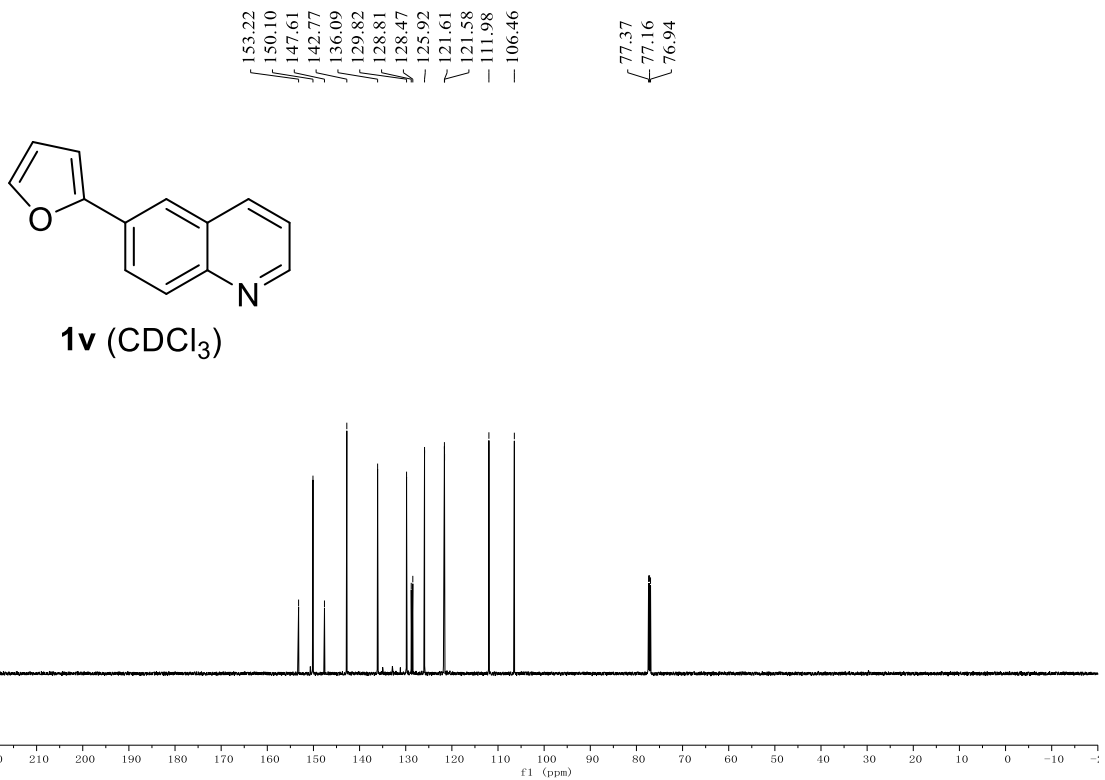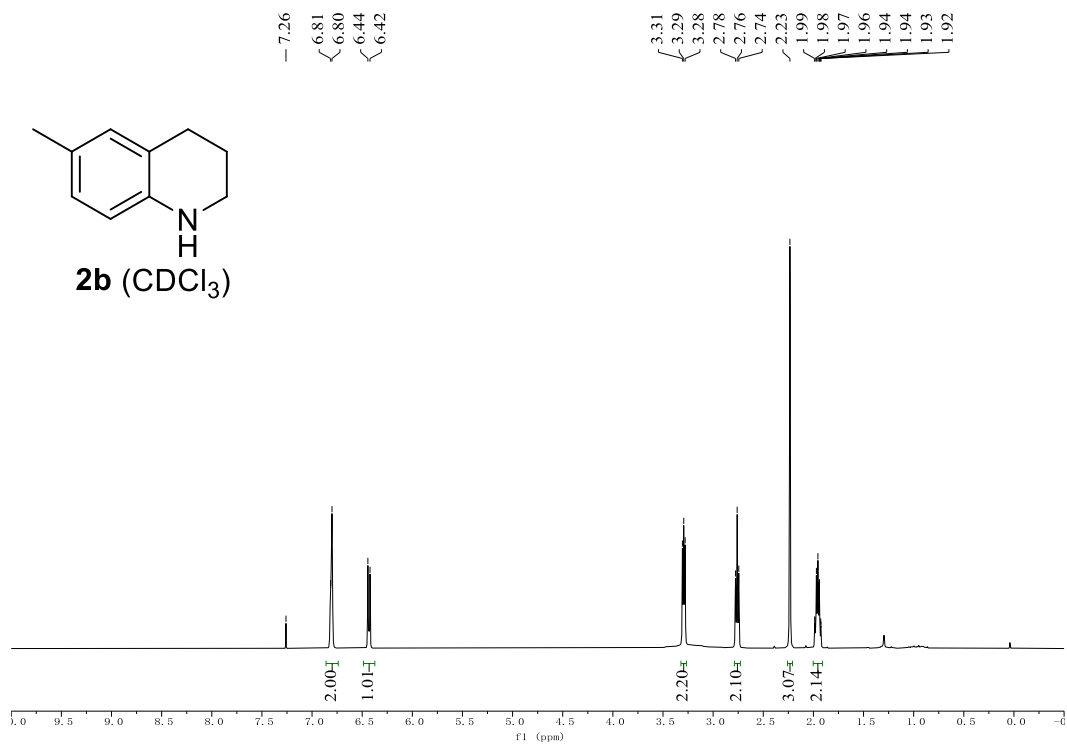

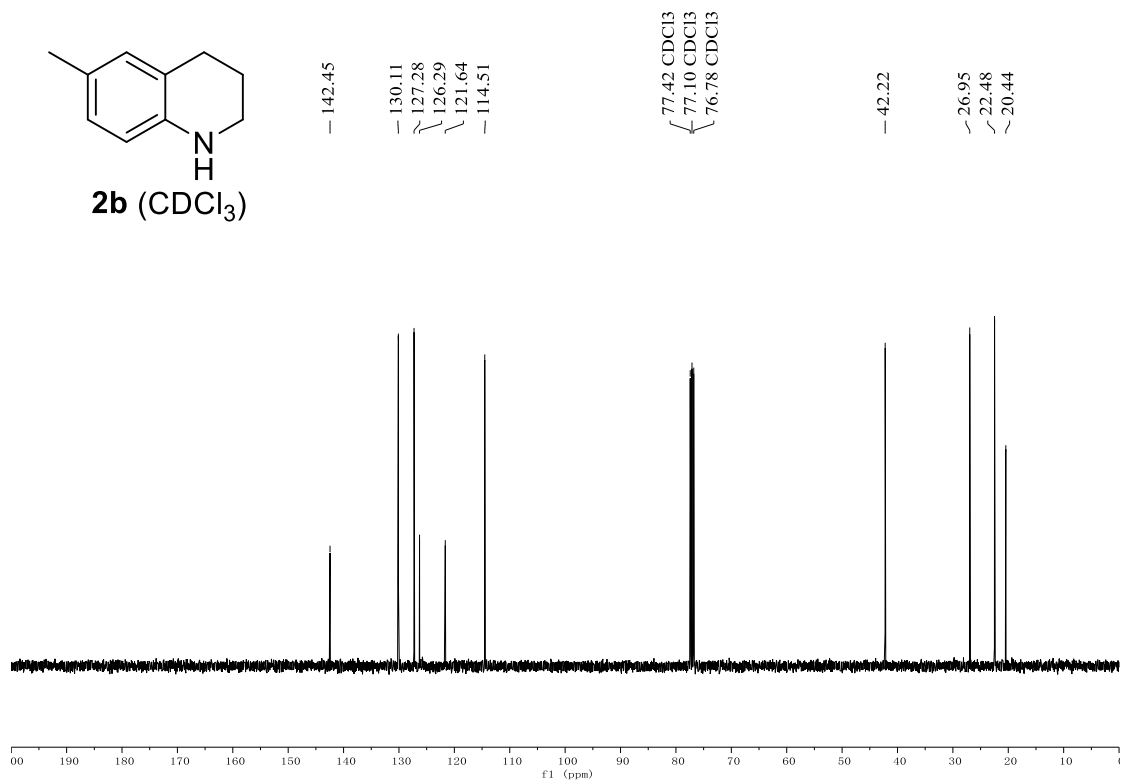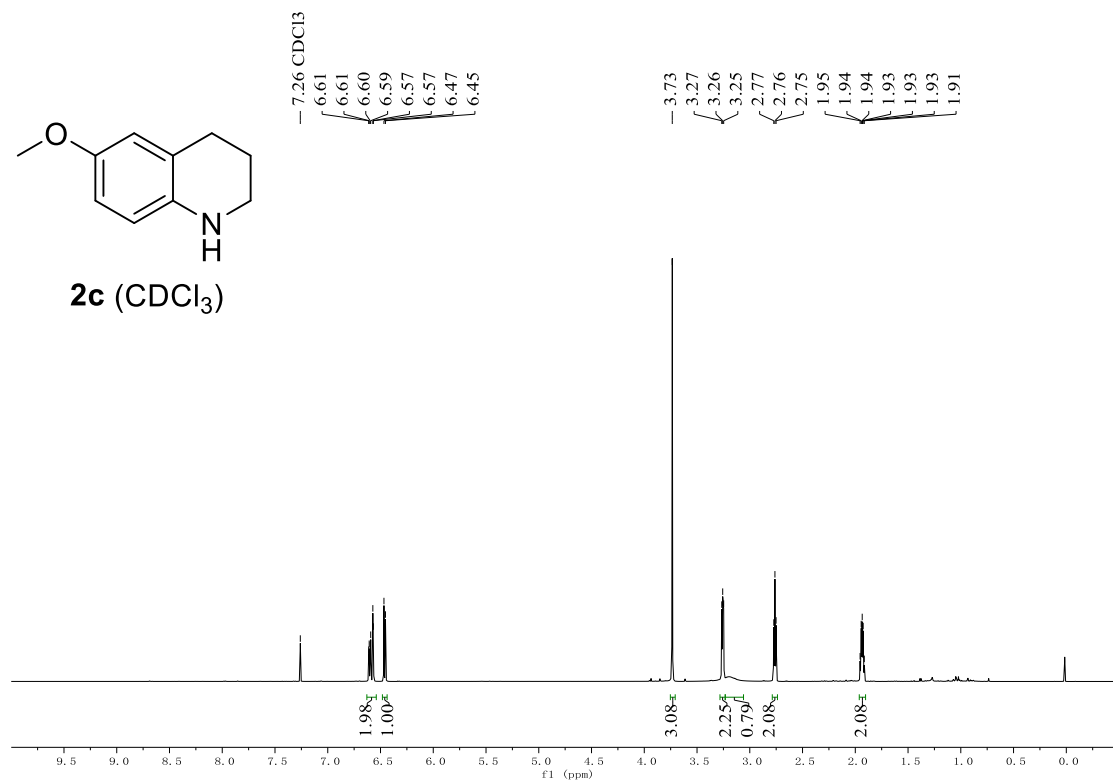

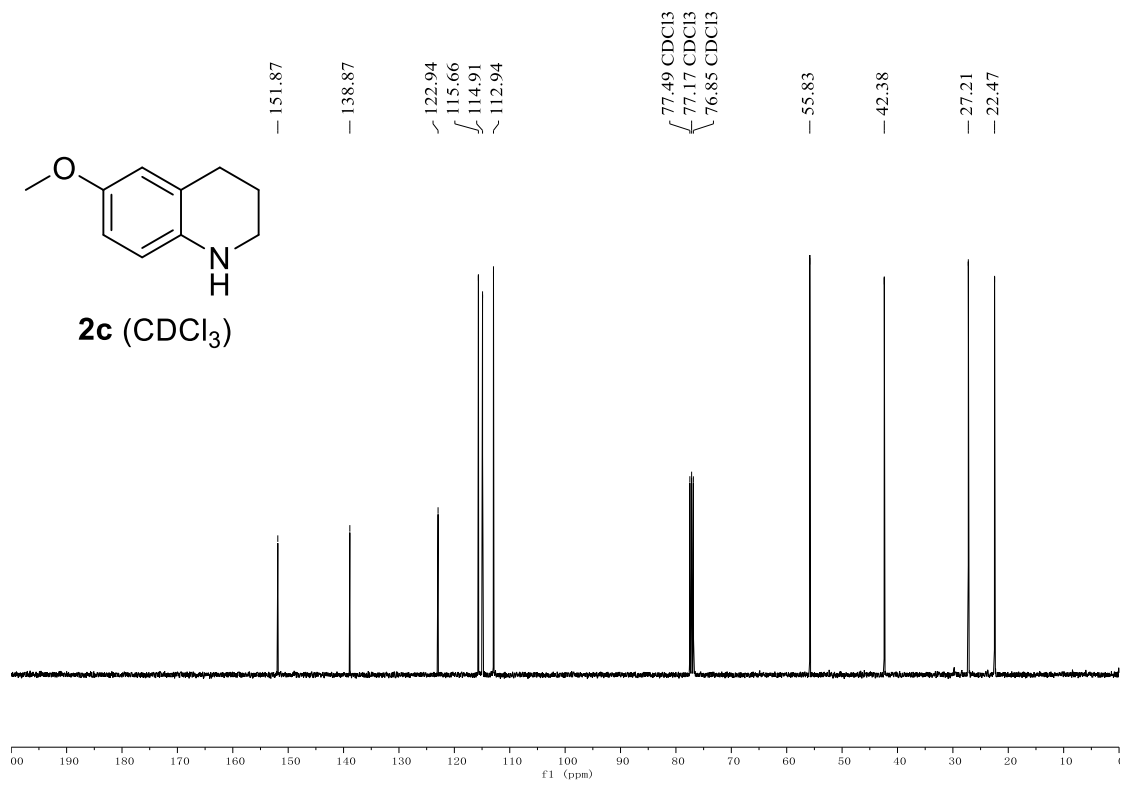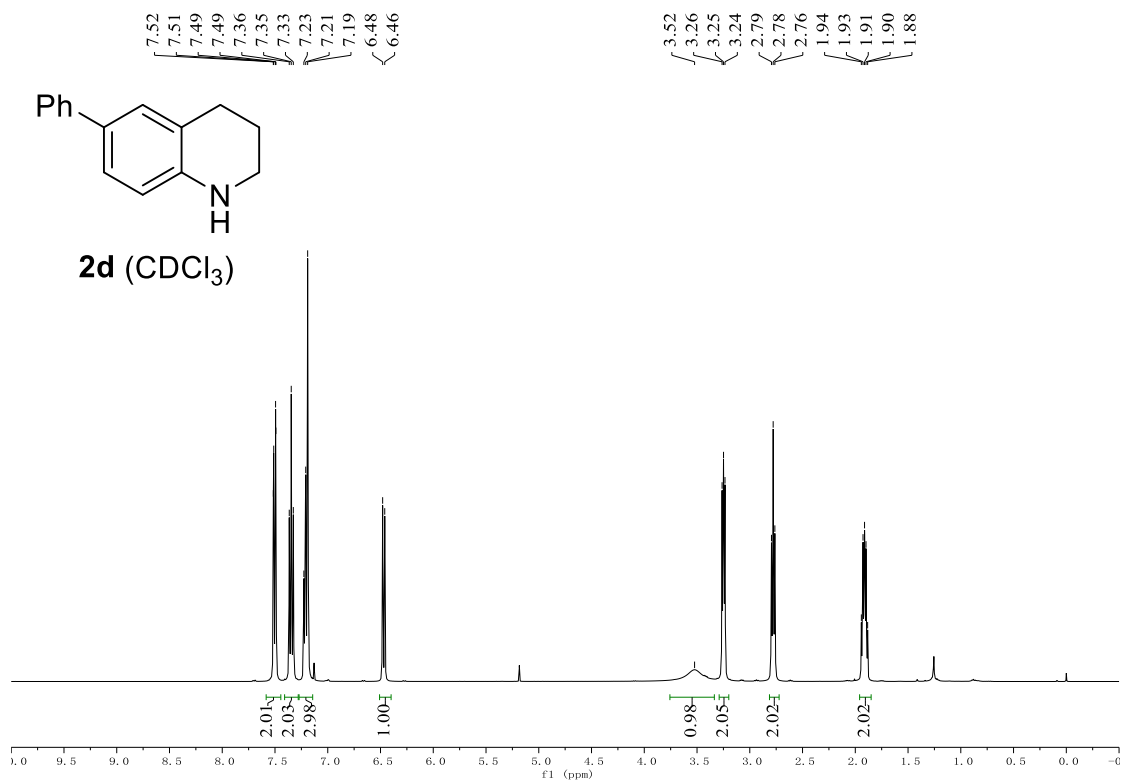

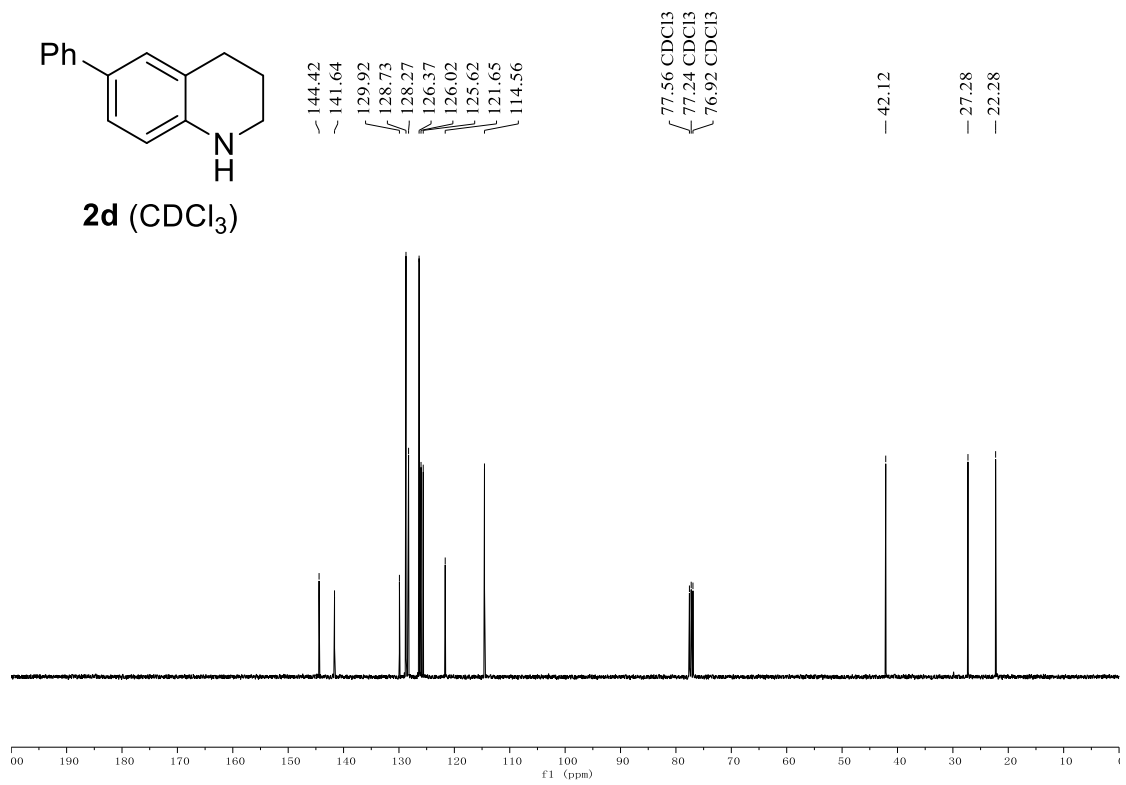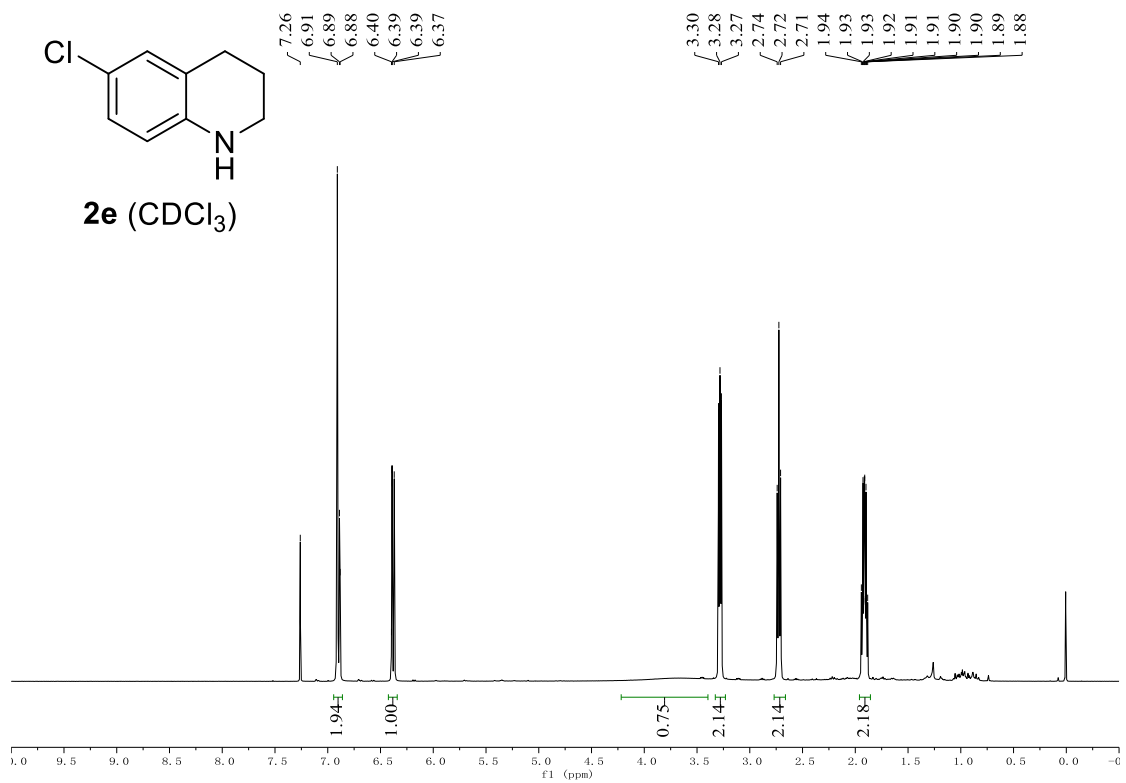

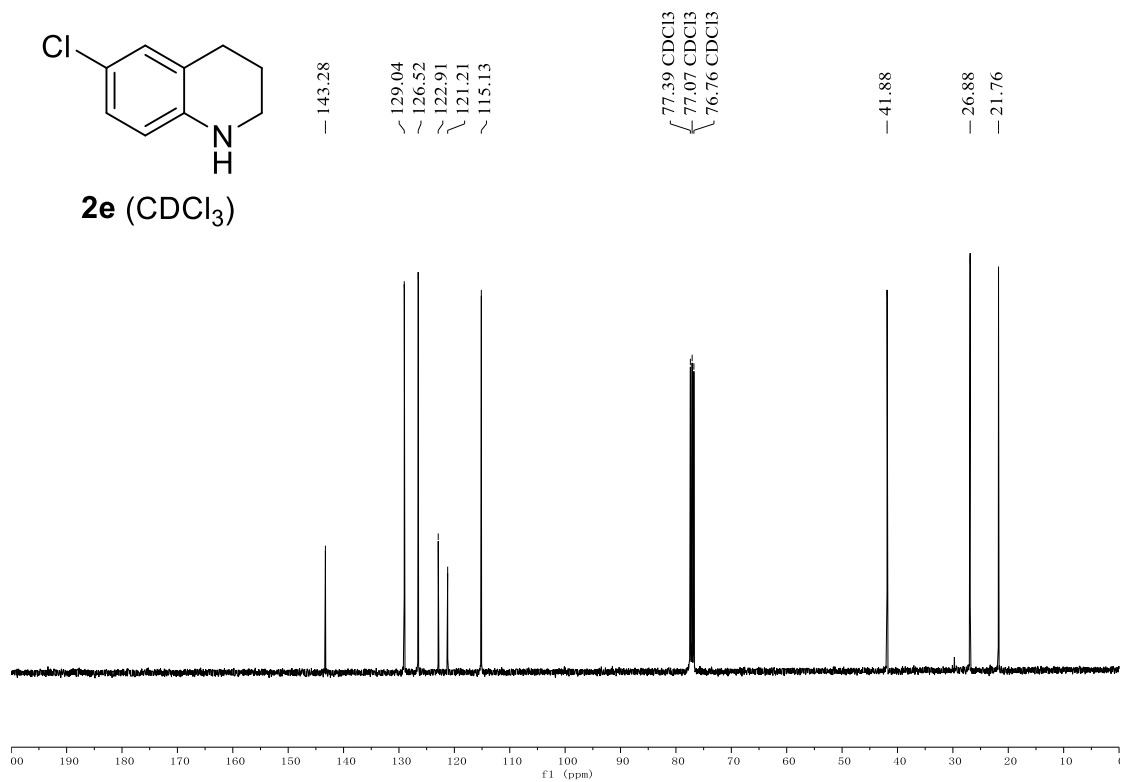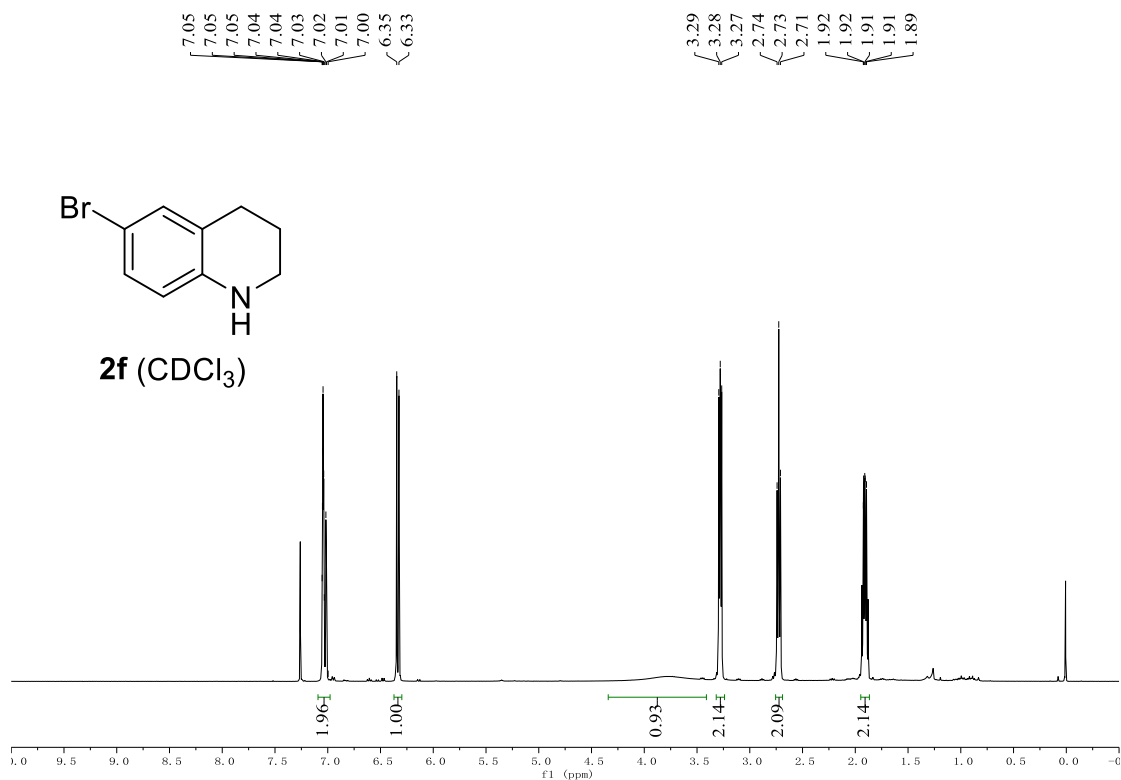

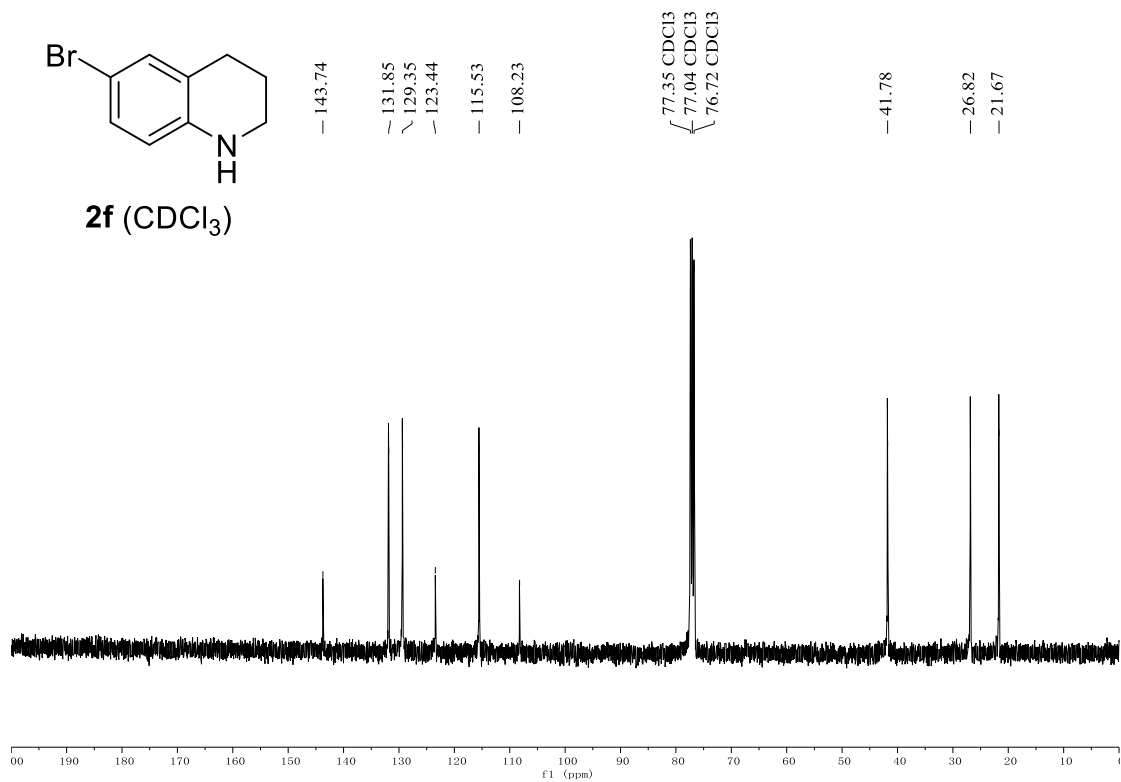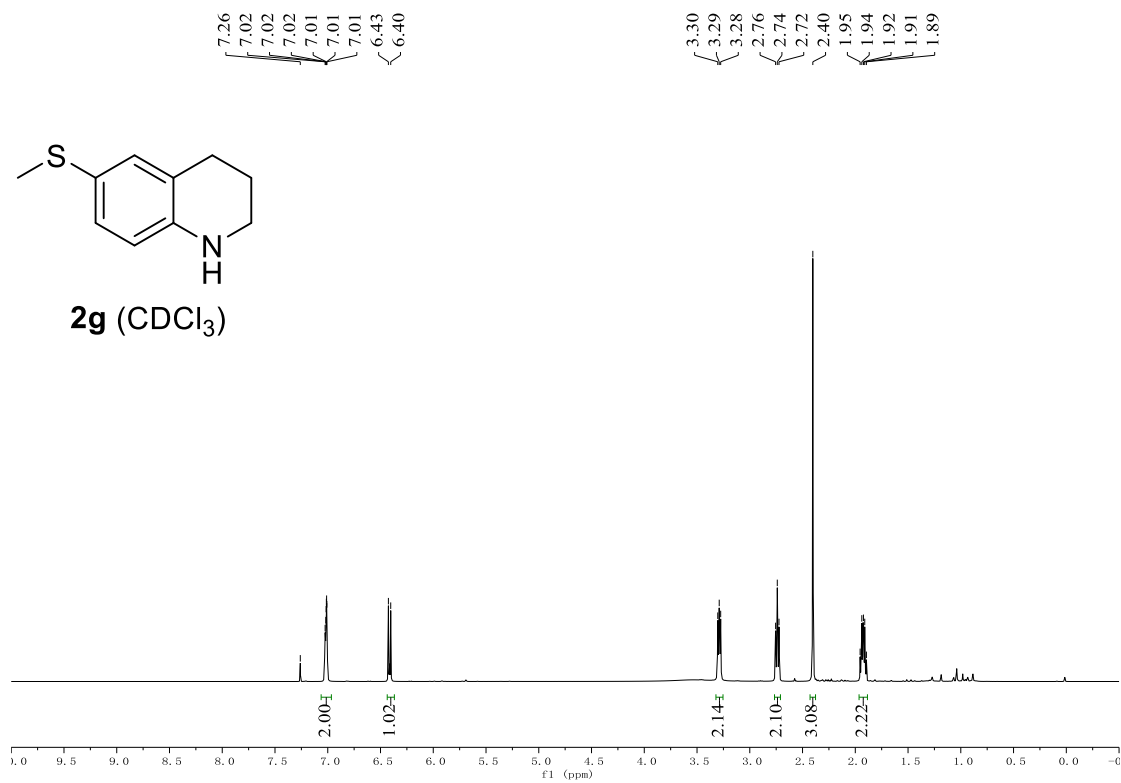

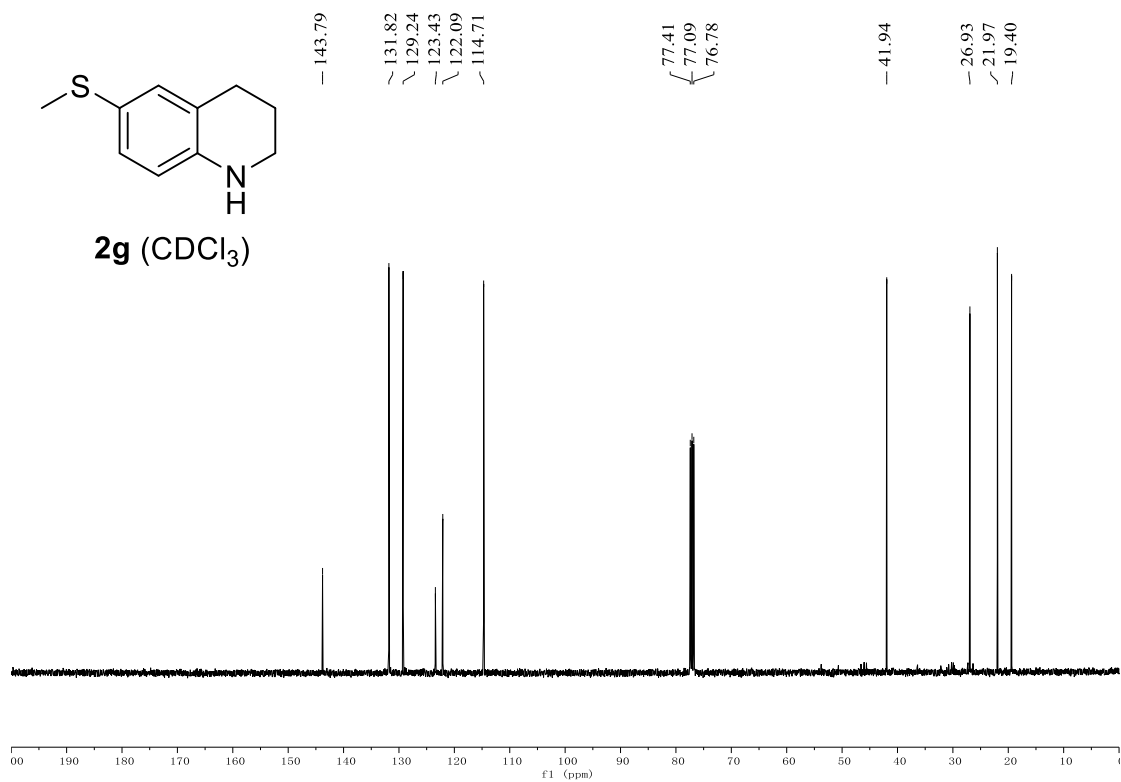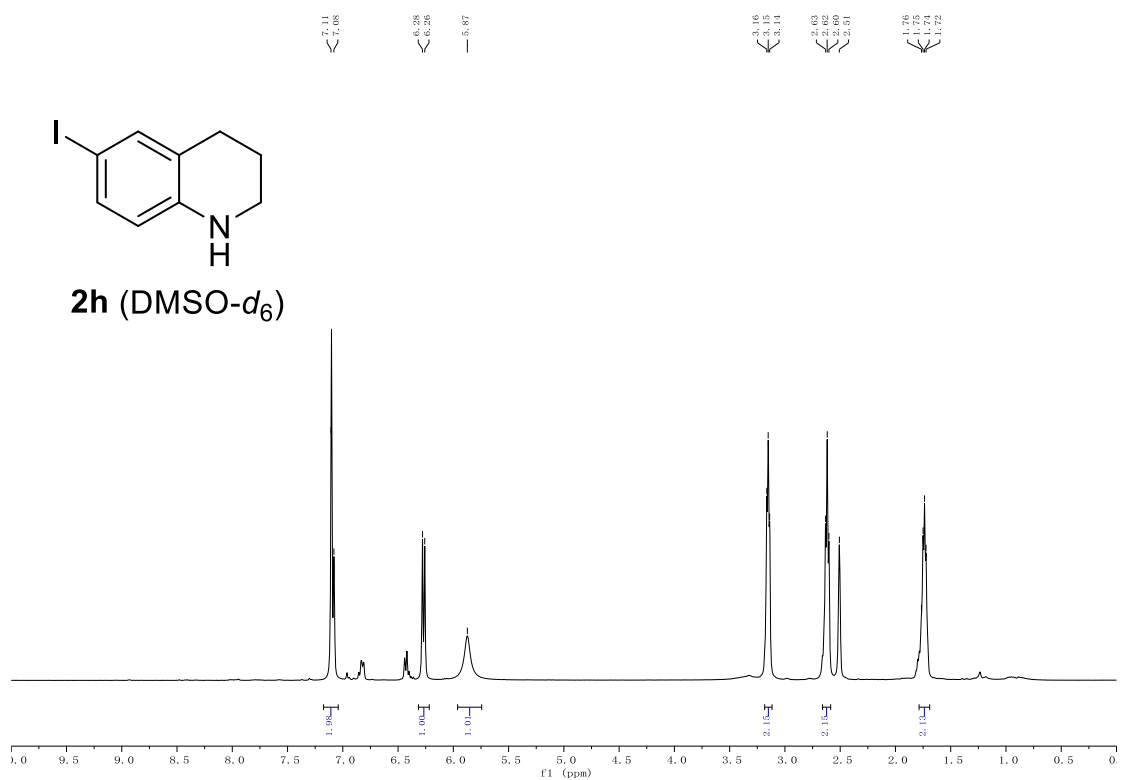



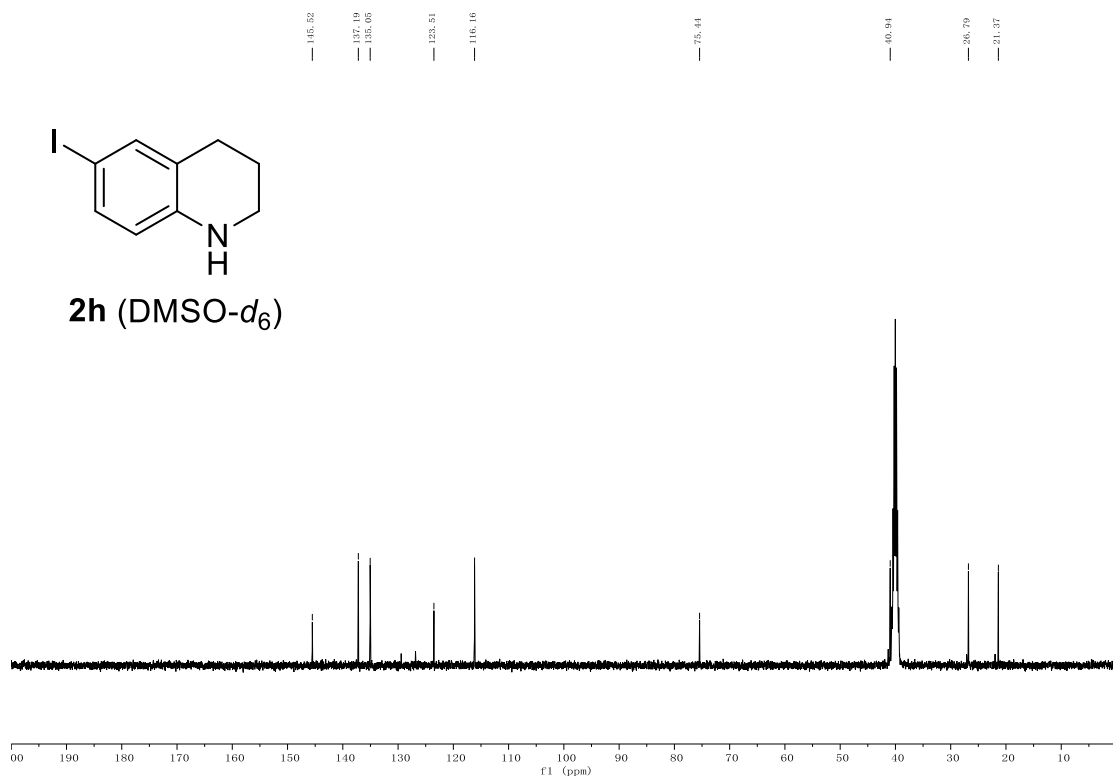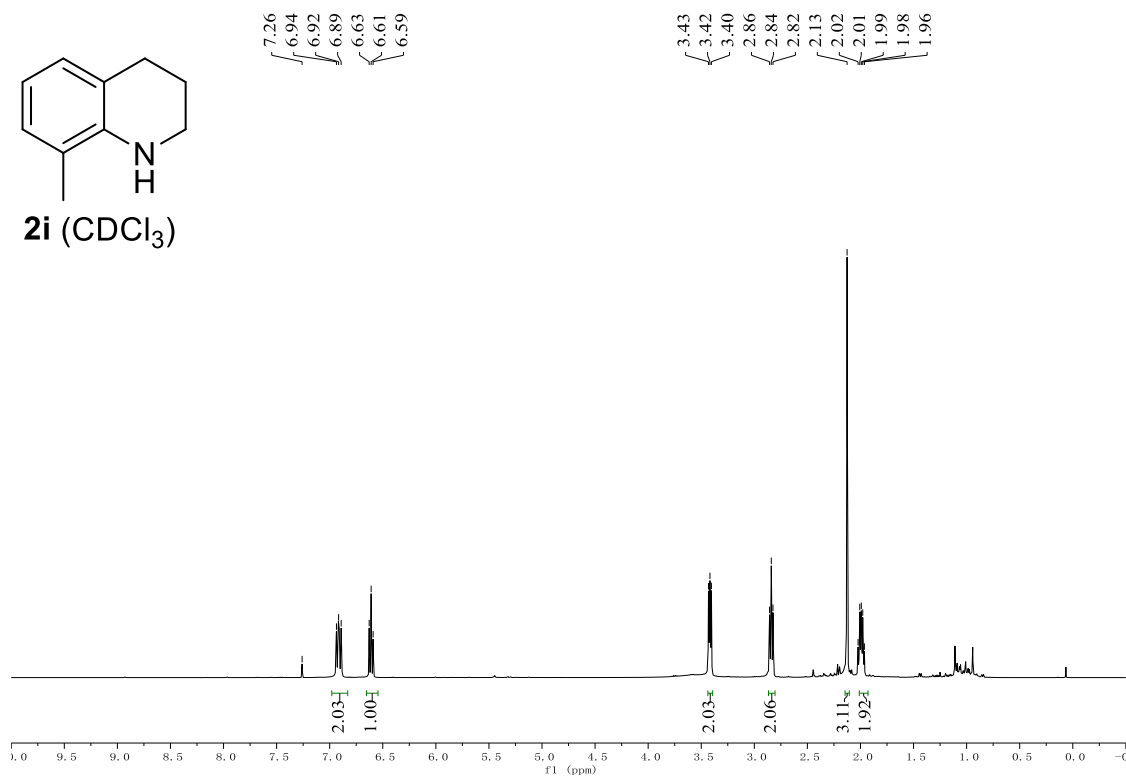

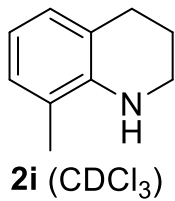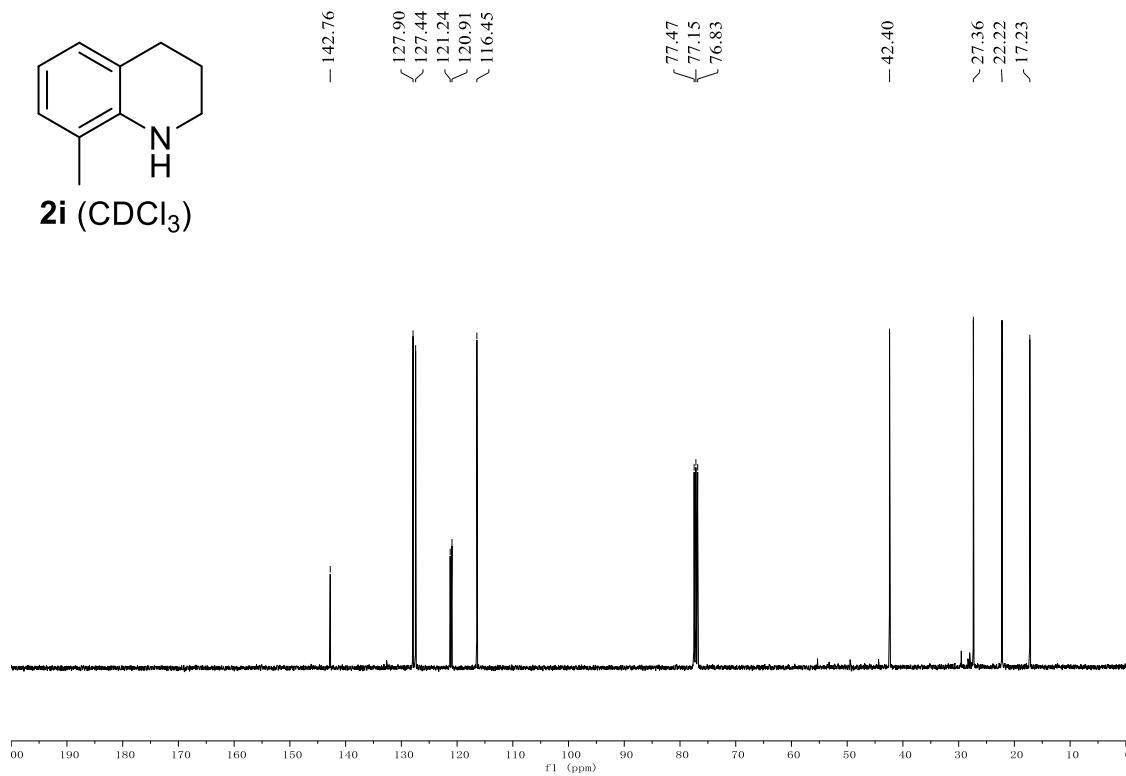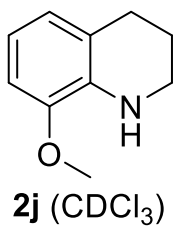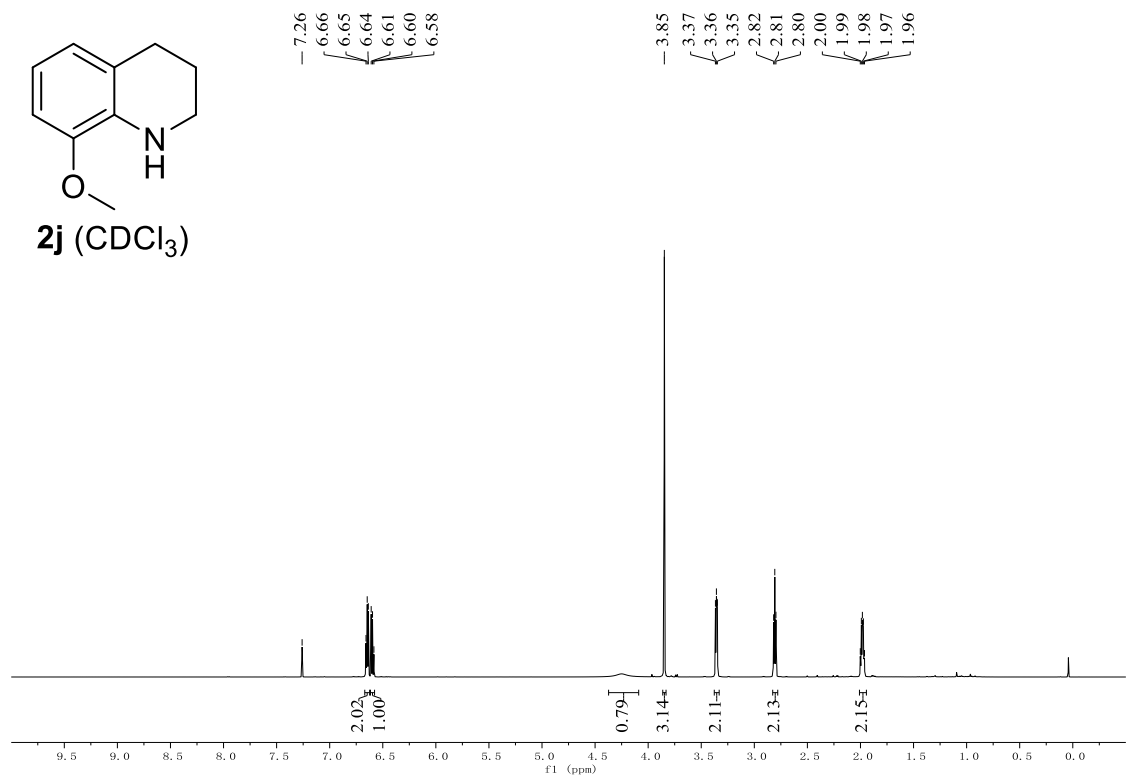

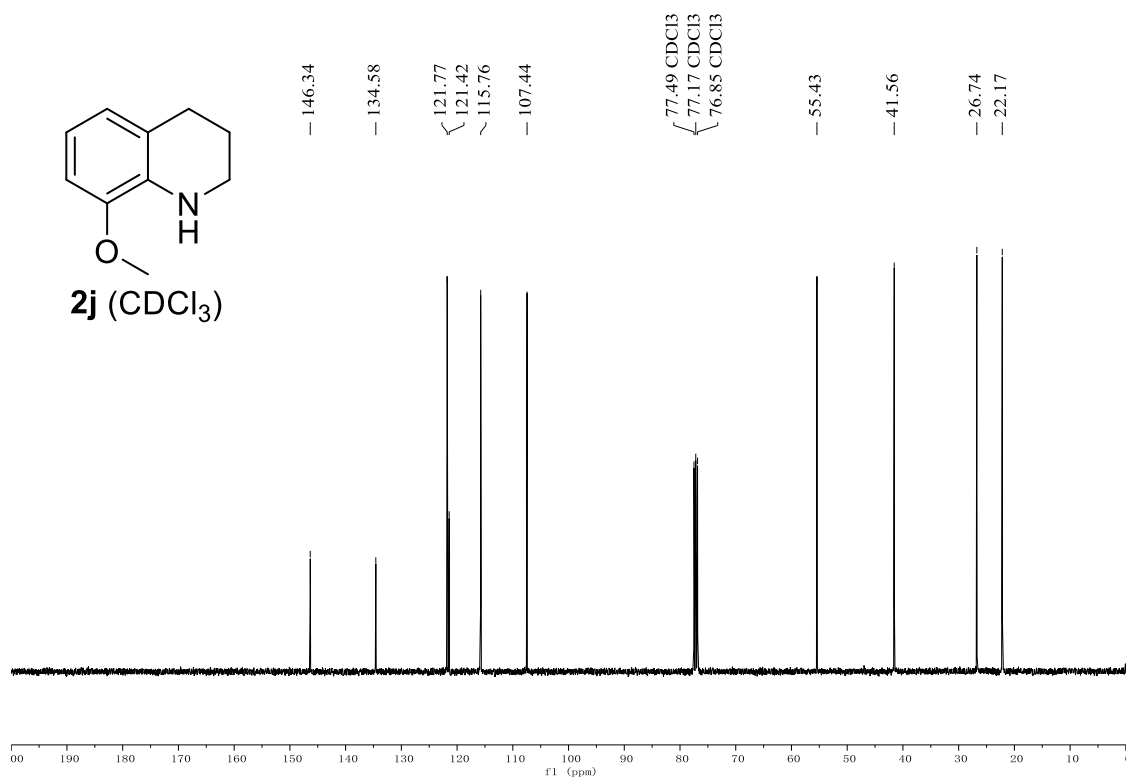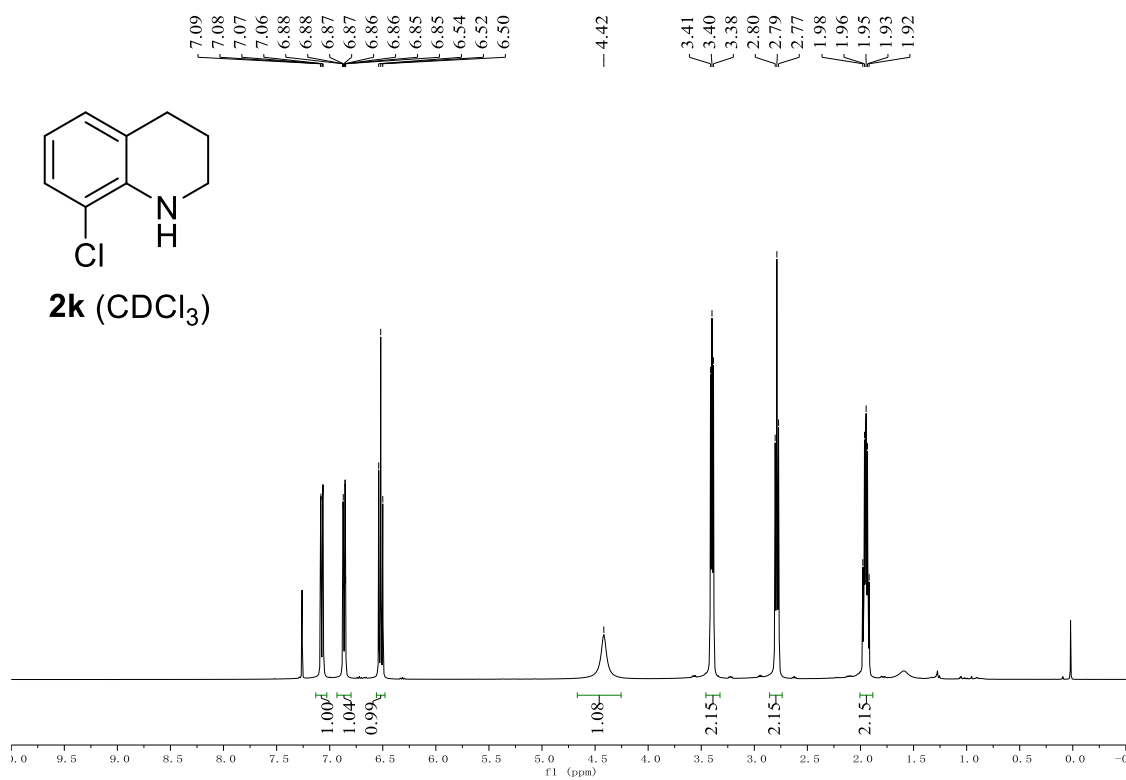

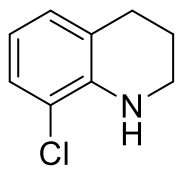

**2k** (CDCl<sub>3</sub>)

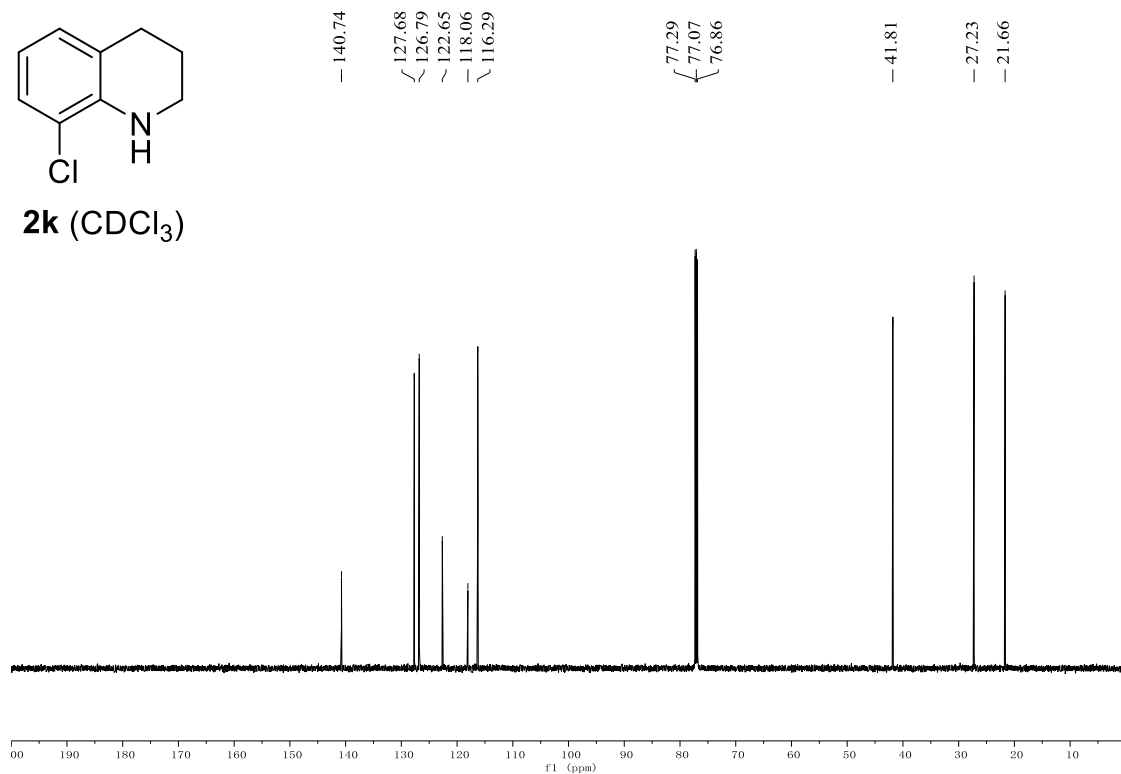

7.46, 7.46, 7.45, 7.44, 7.42, 7.42, 7.40, 7.40, 7.40, 7.38, 7.36, 7.34, 7.26, 6.71, 6.69, 6.66, 6.65, 6.58, 6.56, 6.54, 4.30, 3.35, 3.33, 3.32, 2.82, 2.80, 2.78, 2.00, 1.98, 1.97, 1.96, 1.94

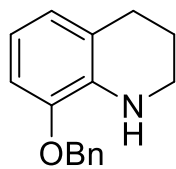

**2l** (CDCl<sub>3</sub>)

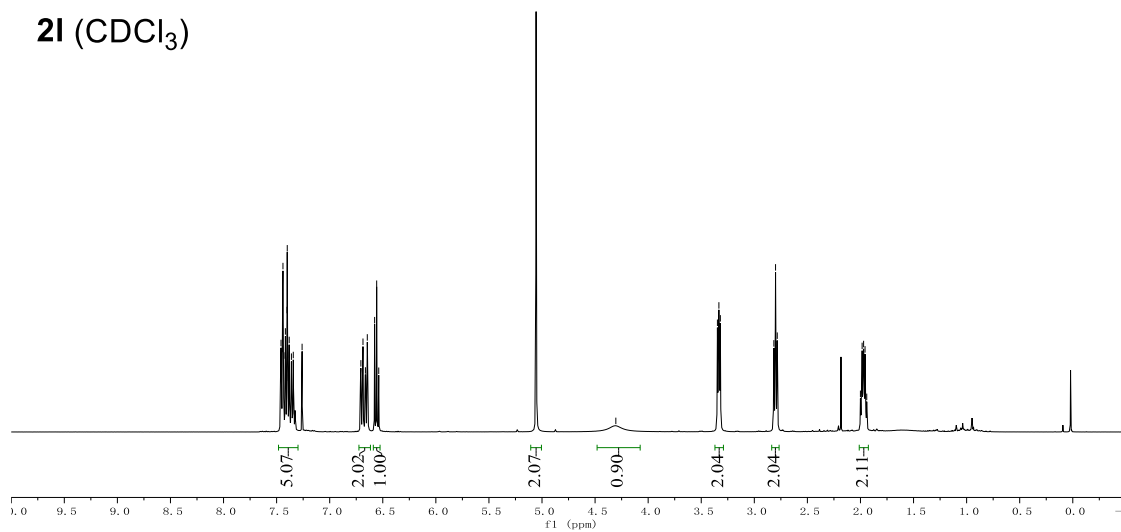

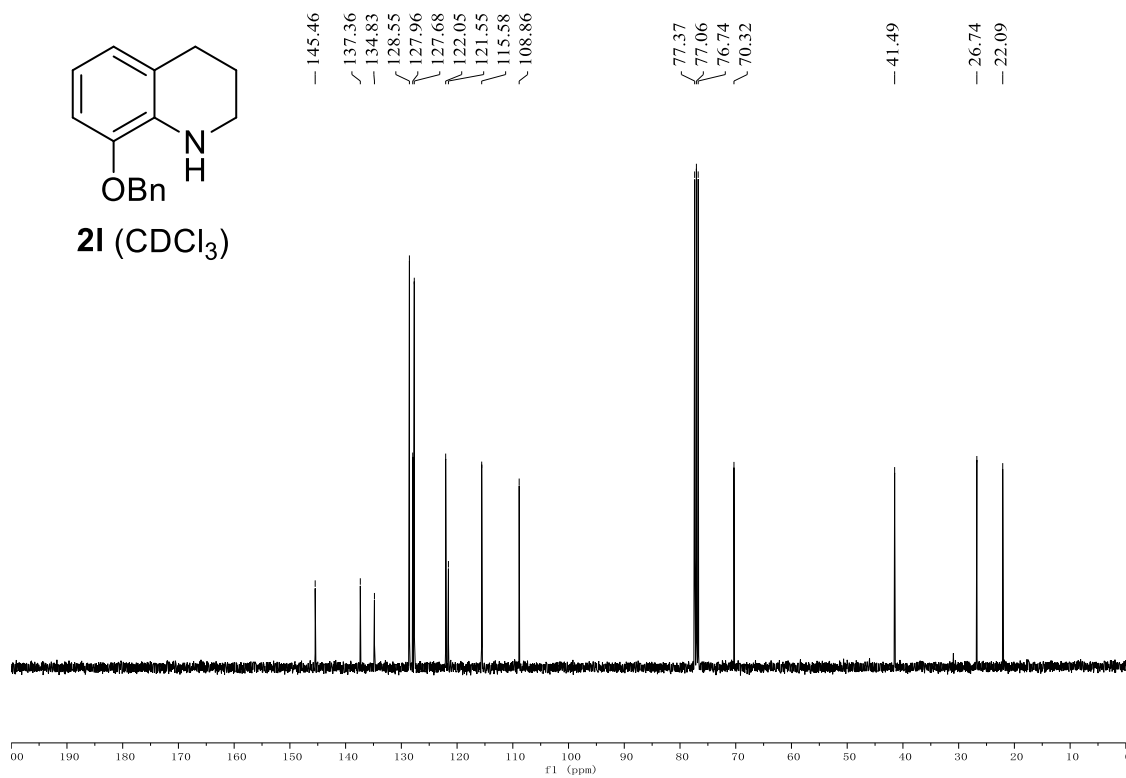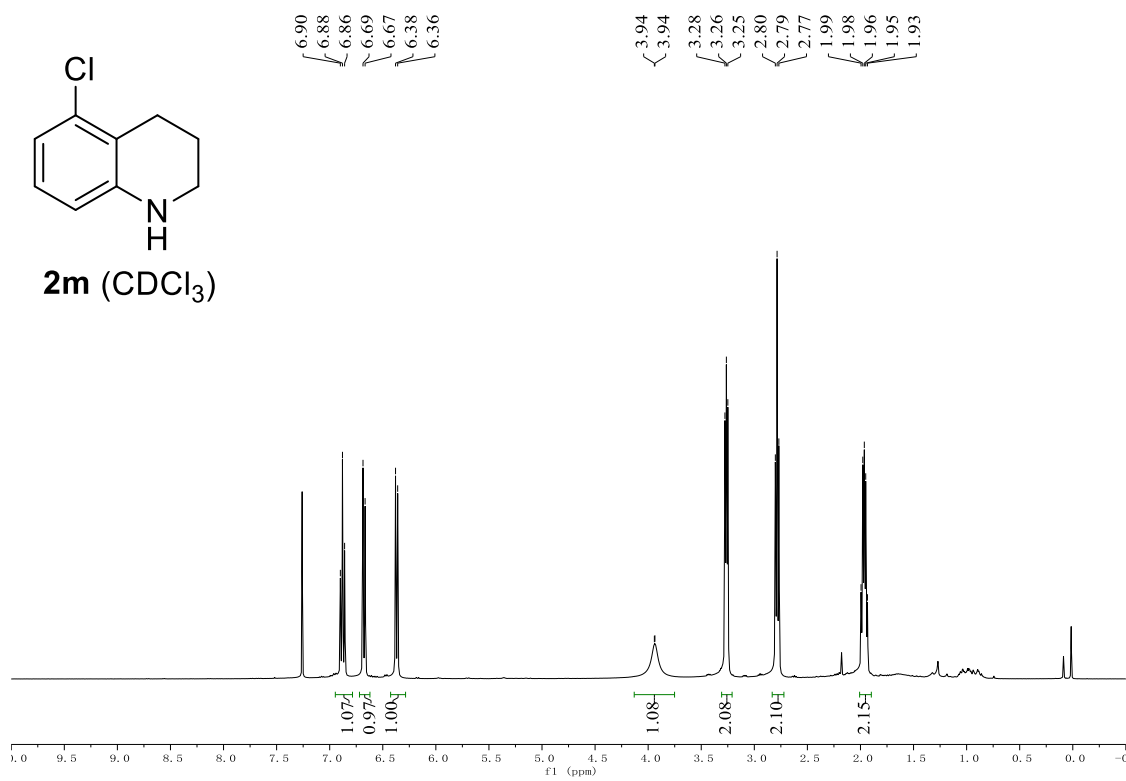

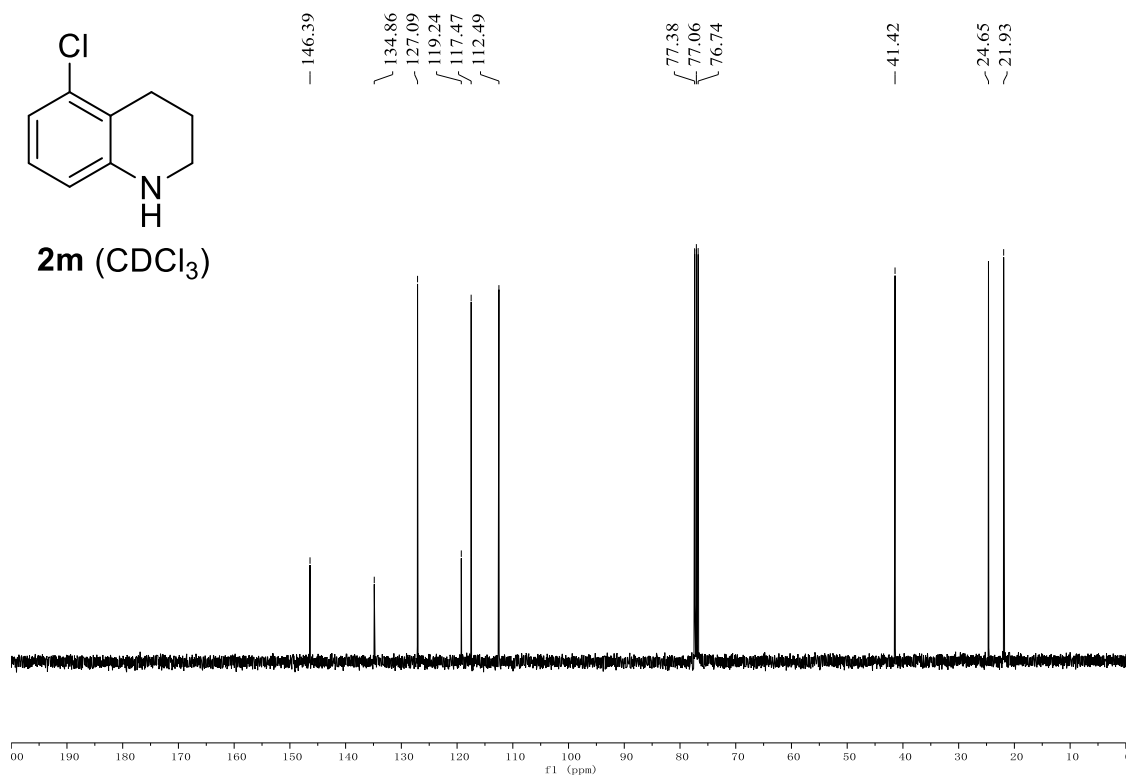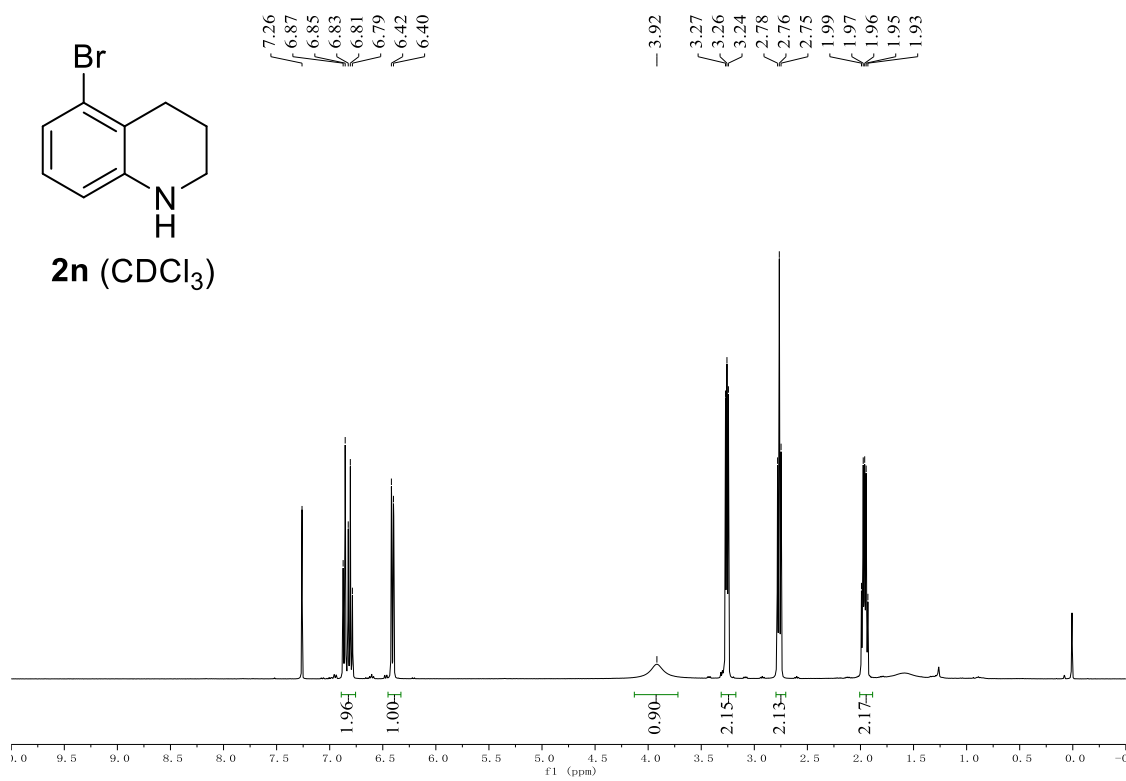

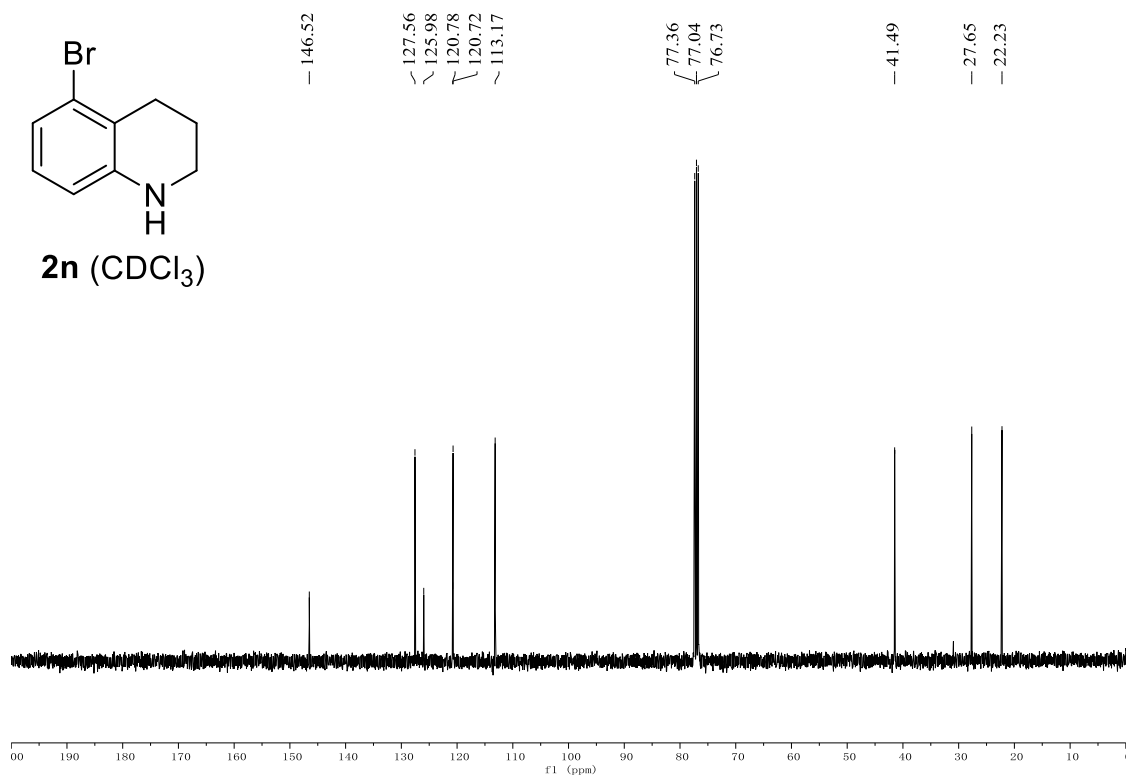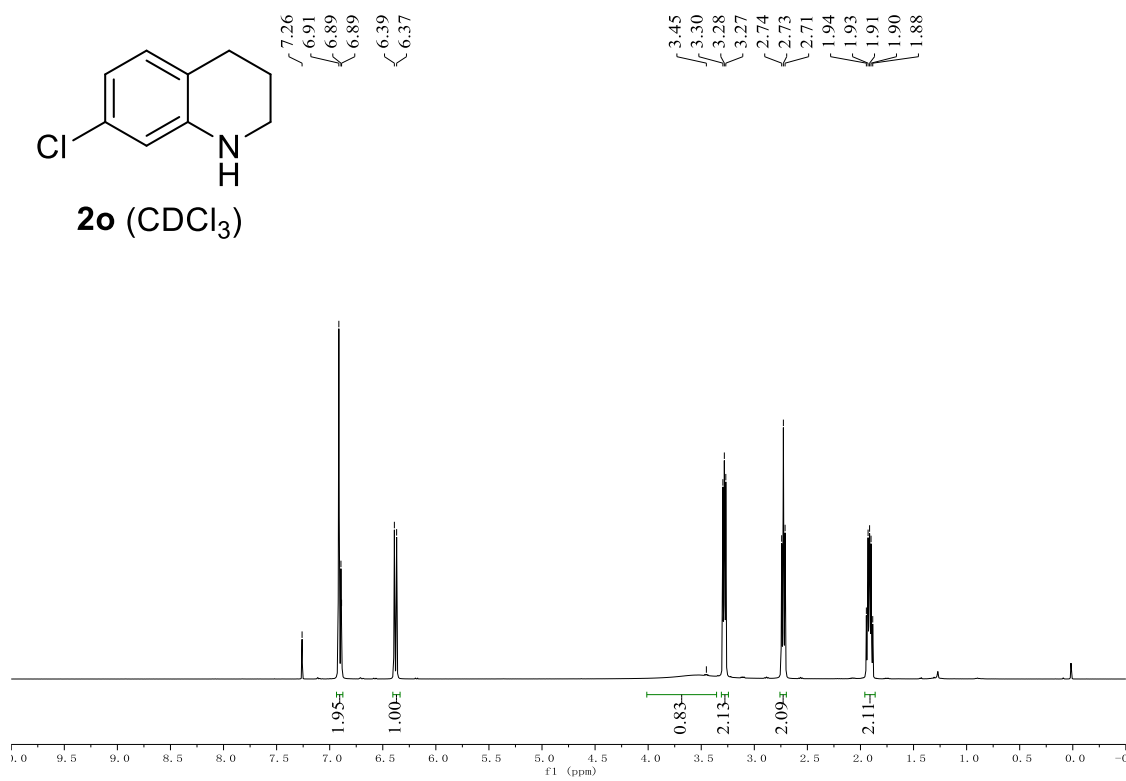

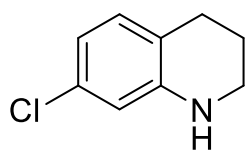

**2o** (CDCl<sub>3</sub>)

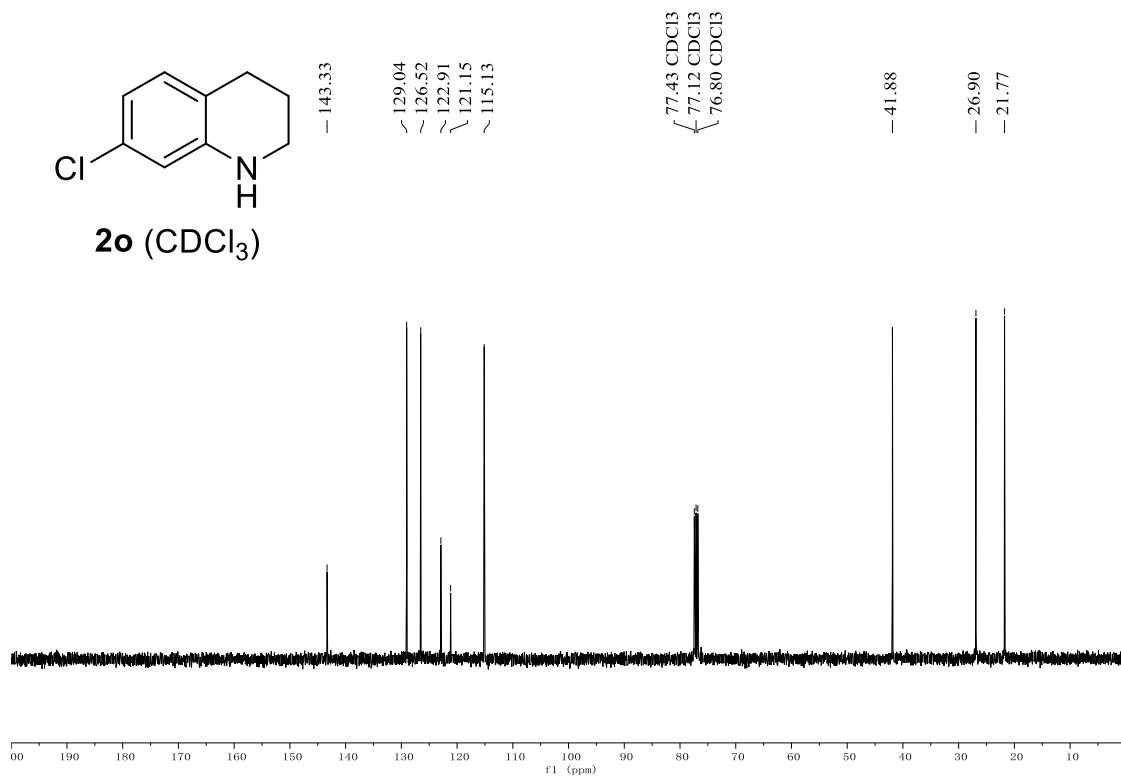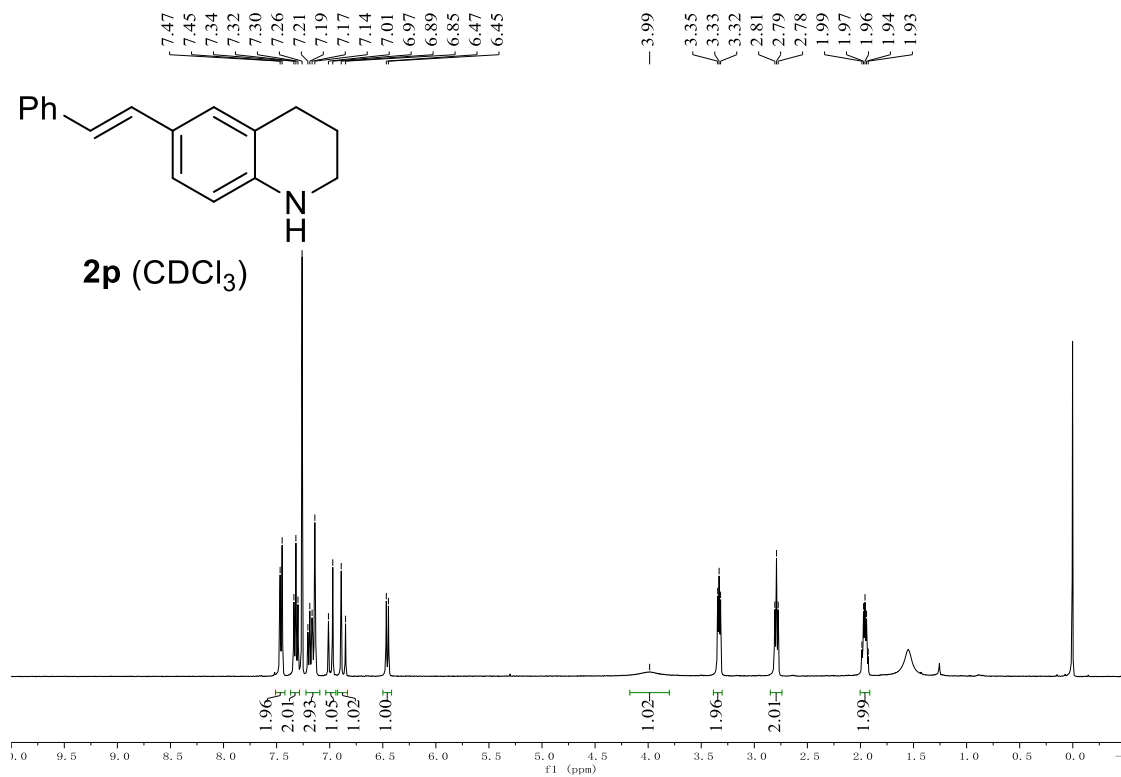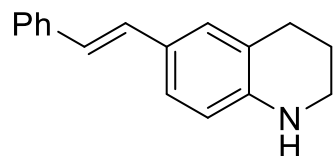

**2p** (CDCl<sub>3</sub>)



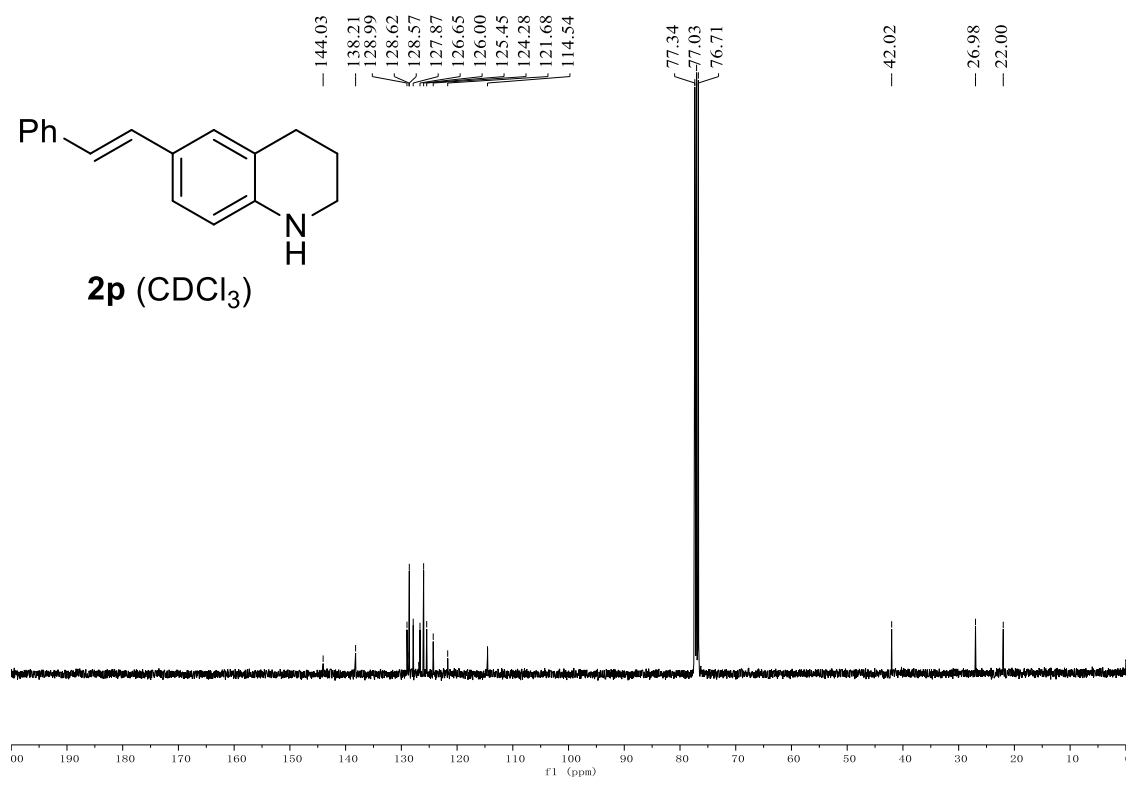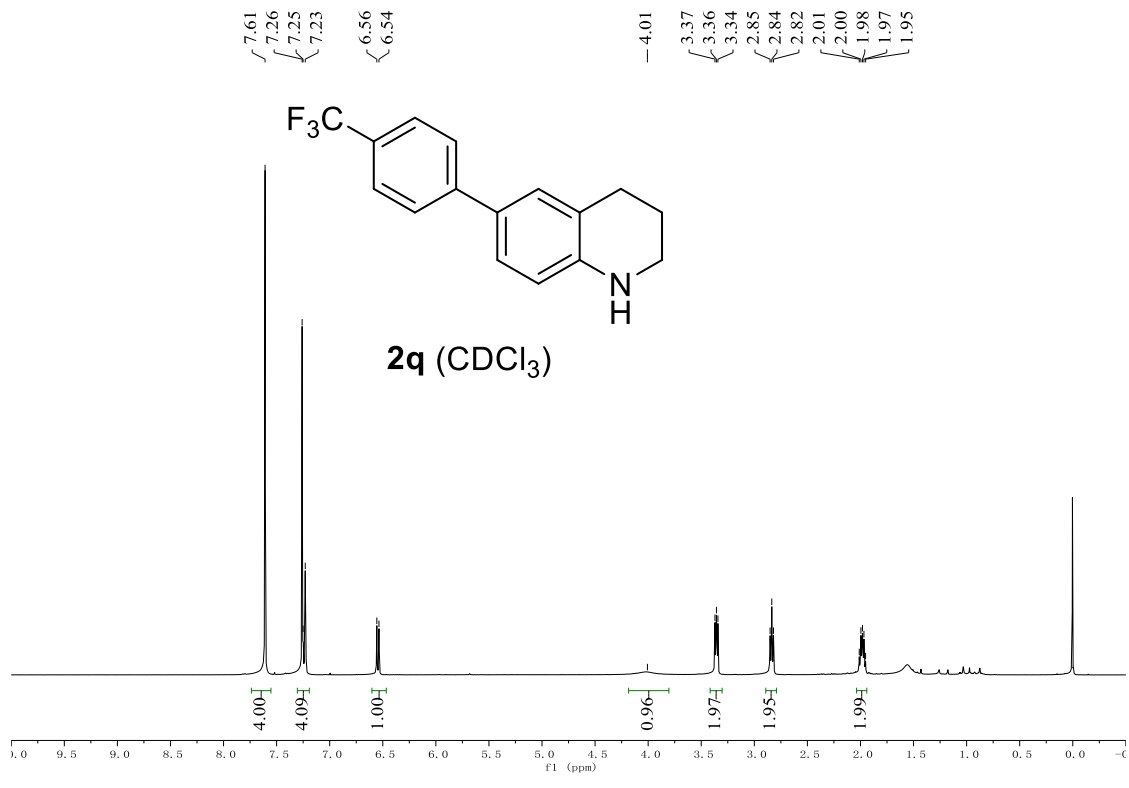

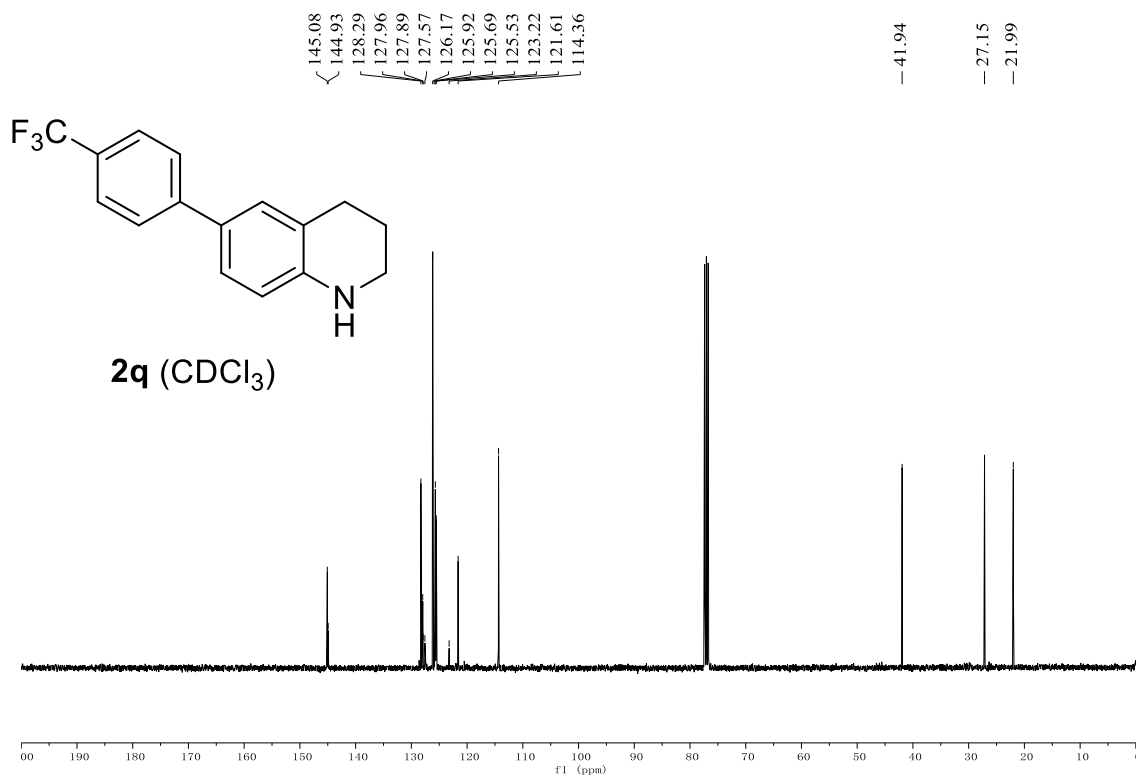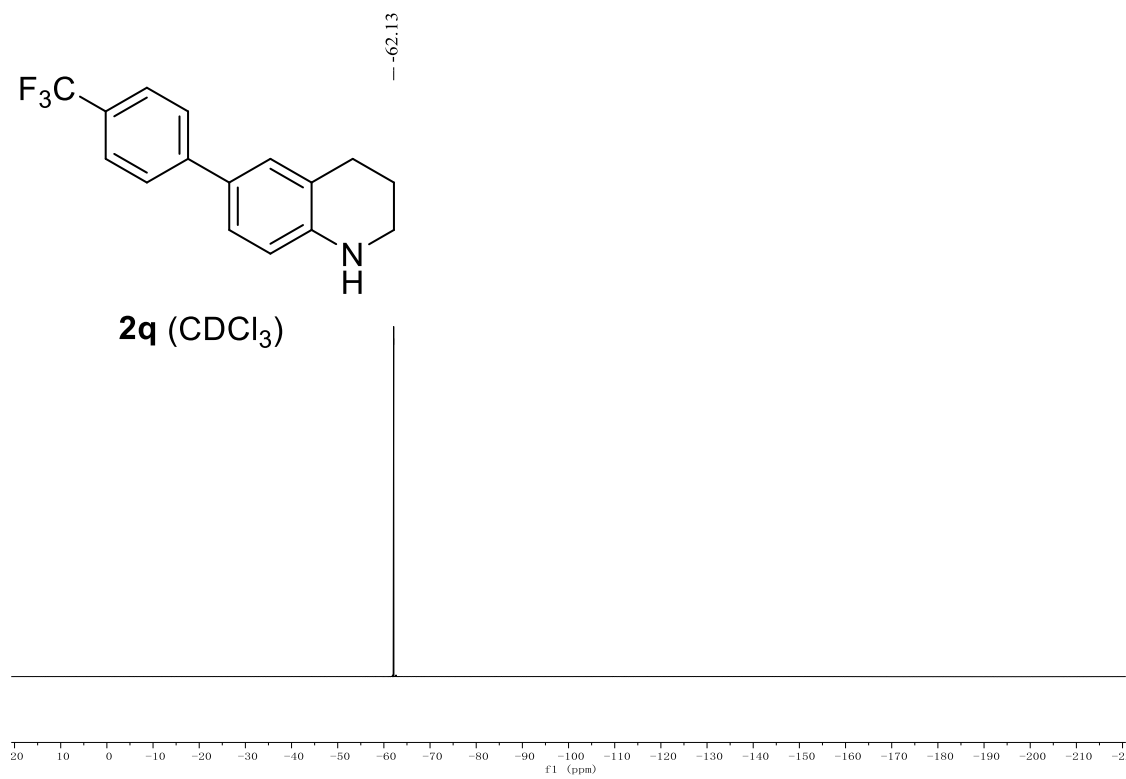

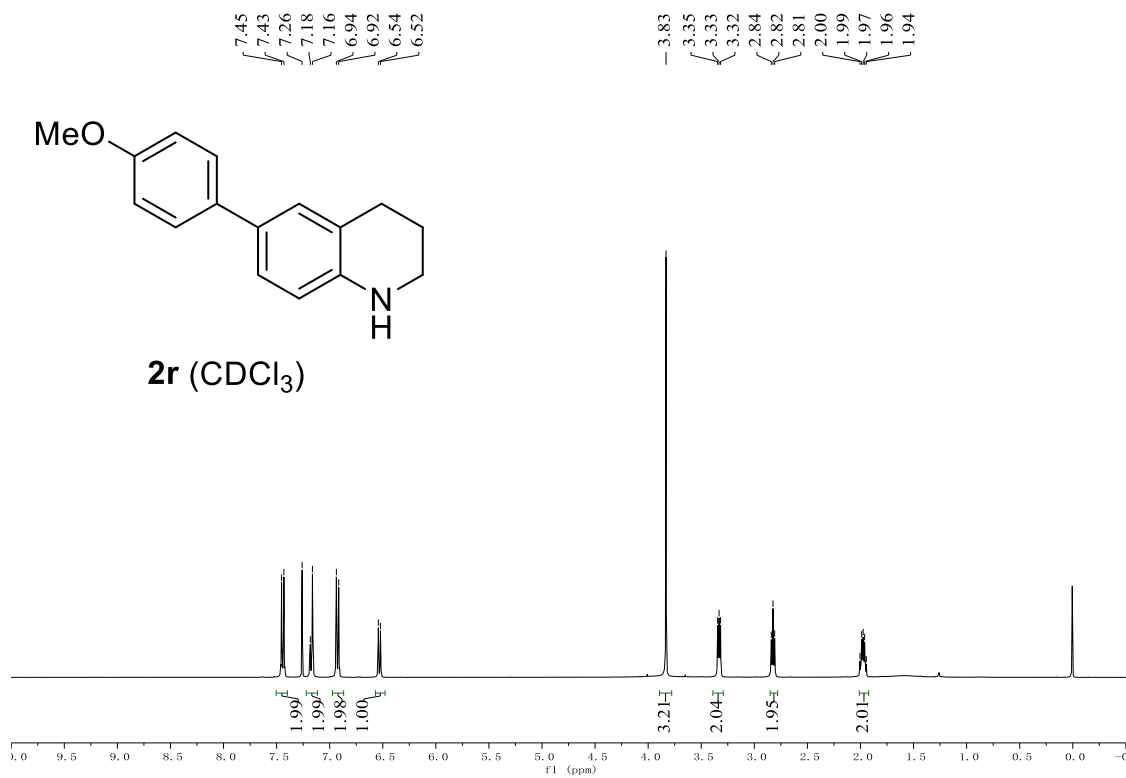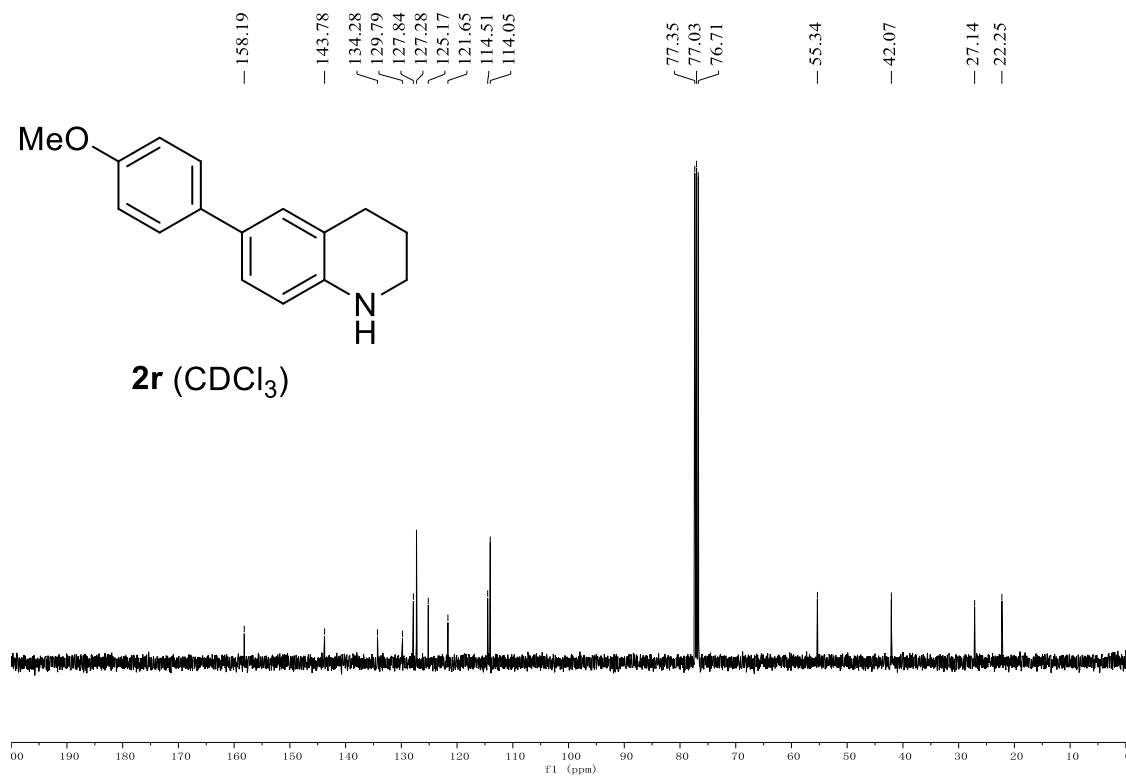

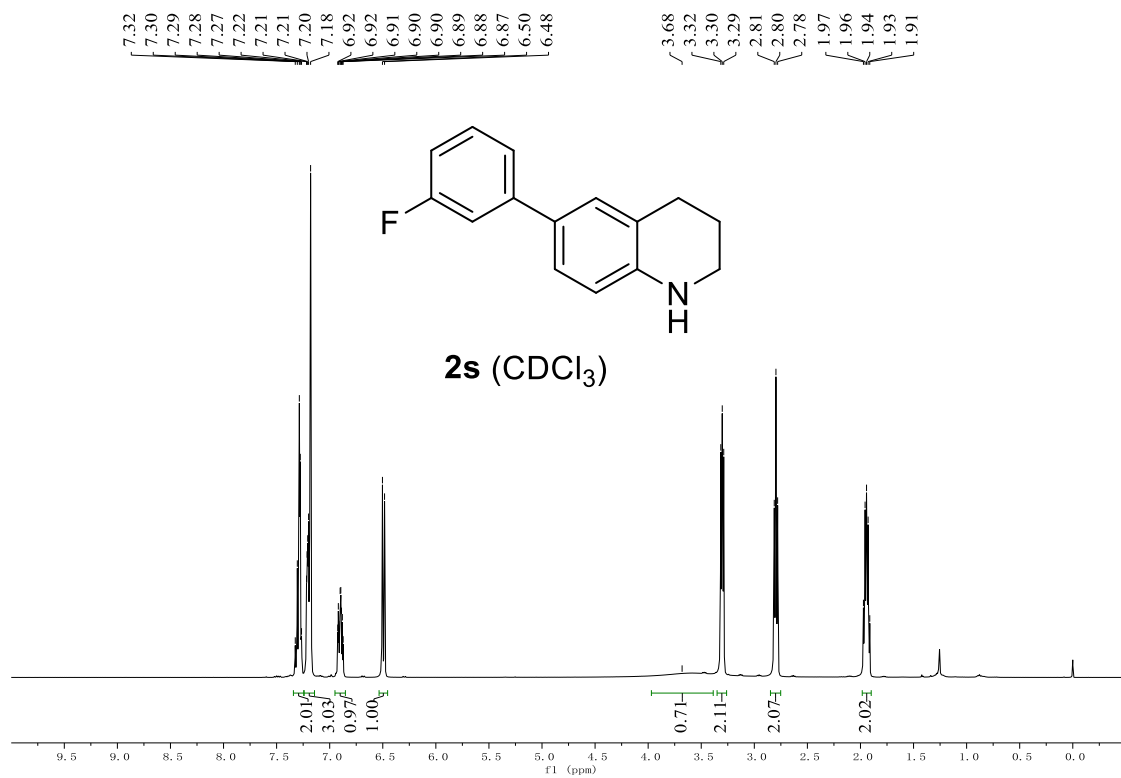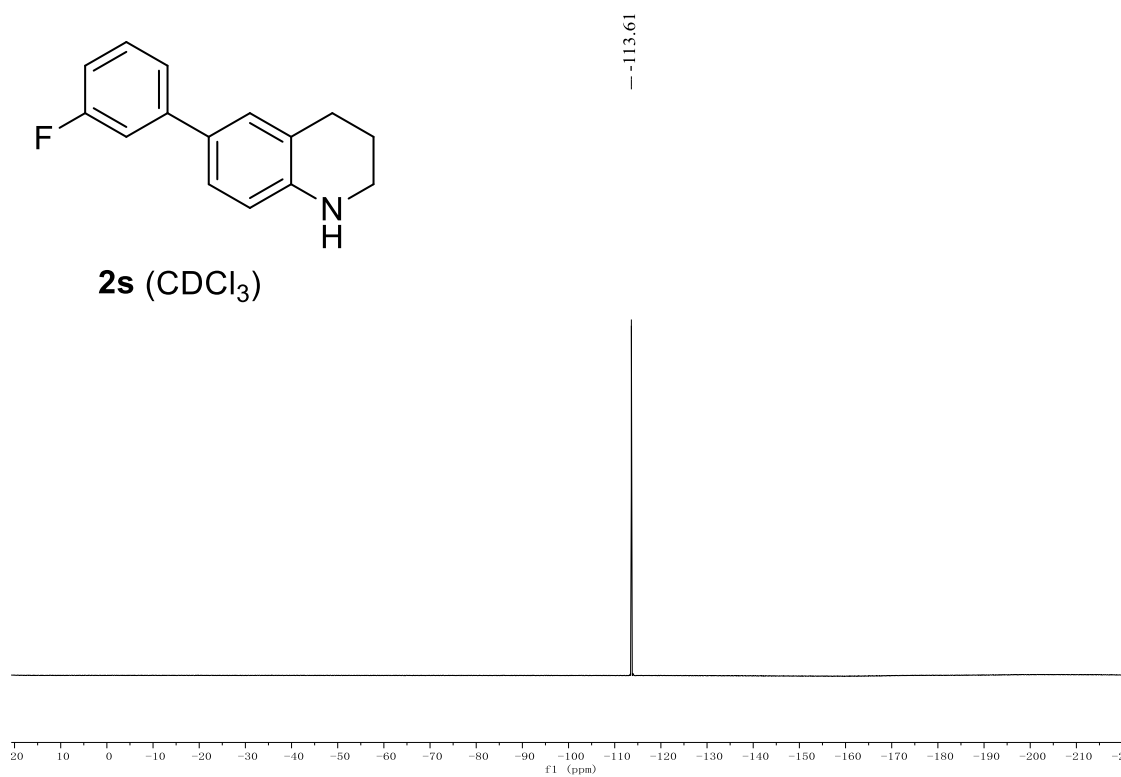

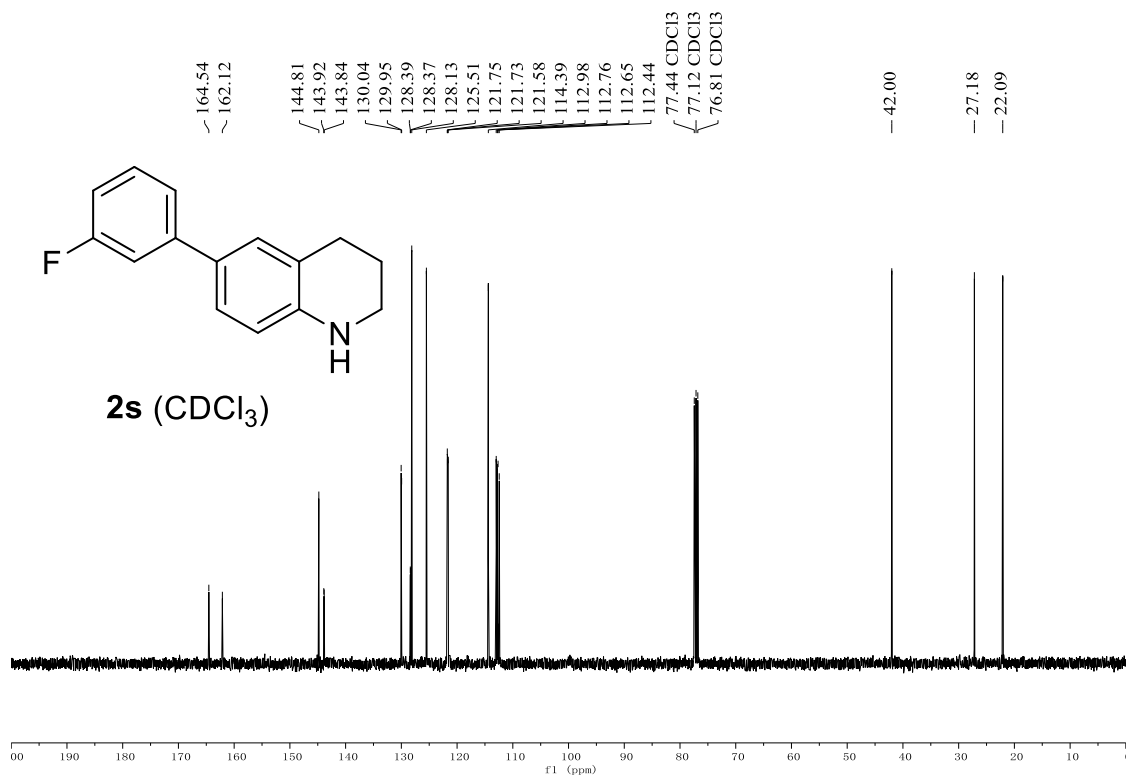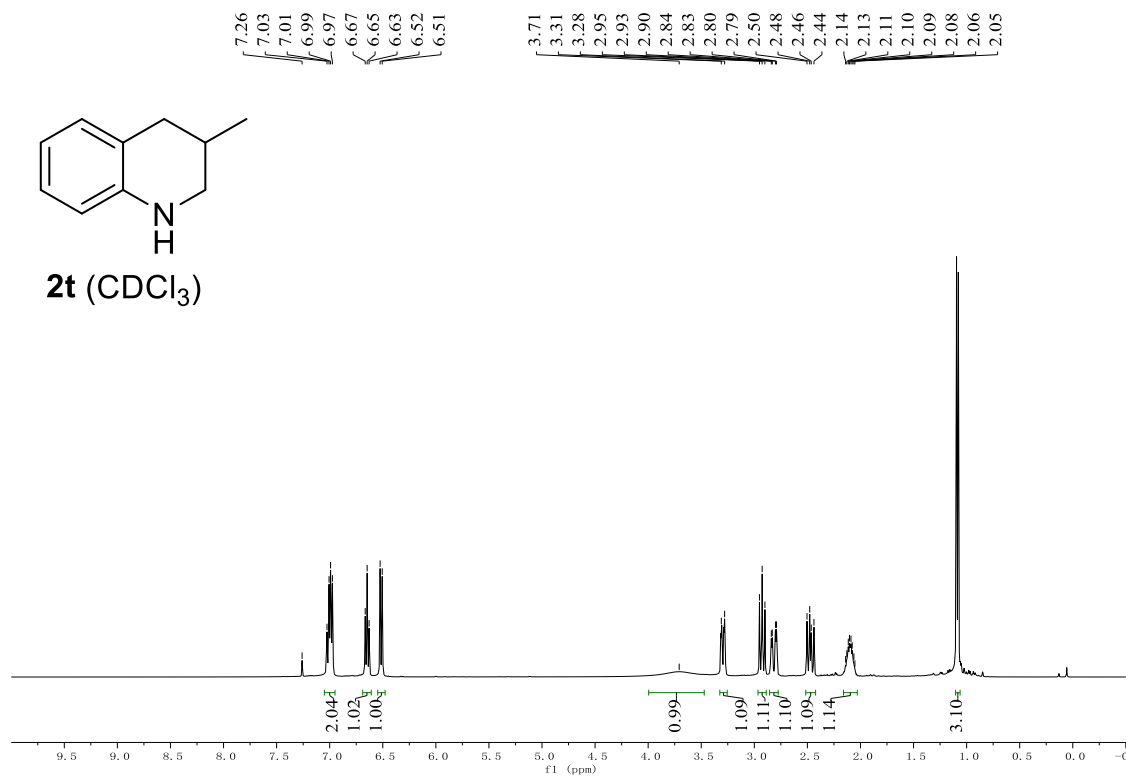

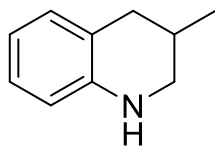

**2t** (CDCl<sub>3</sub>)

144.36  
 129.59  
 126.75  
 121.16  
 116.97  
 113.93  
 77.46  
 77.14  
 76.82  
 48.90  
 35.53  
 27.24  
 19.12

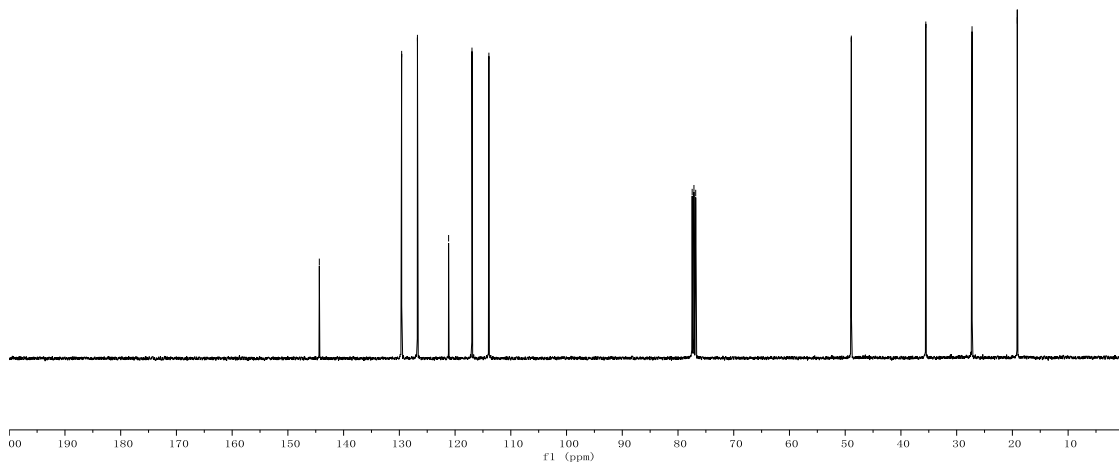

7.26  
 7.25  
 7.23  
 7.21  
 7.15  
 7.15  
 7.14  
 7.13  
 7.13  
 7.04  
 7.04  
 7.03  
 7.03  
 7.02  
 7.02  
 6.45  
 6.43  
 3.68  
 3.30  
 3.28  
 3.27  
 2.80  
 2.79  
 2.77  
 1.97  
 1.95  
 1.94  
 1.93  
 1.91

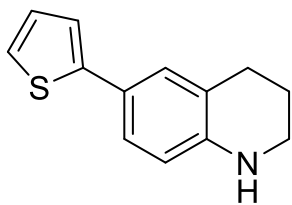

**2u** (CDCl<sub>3</sub>)

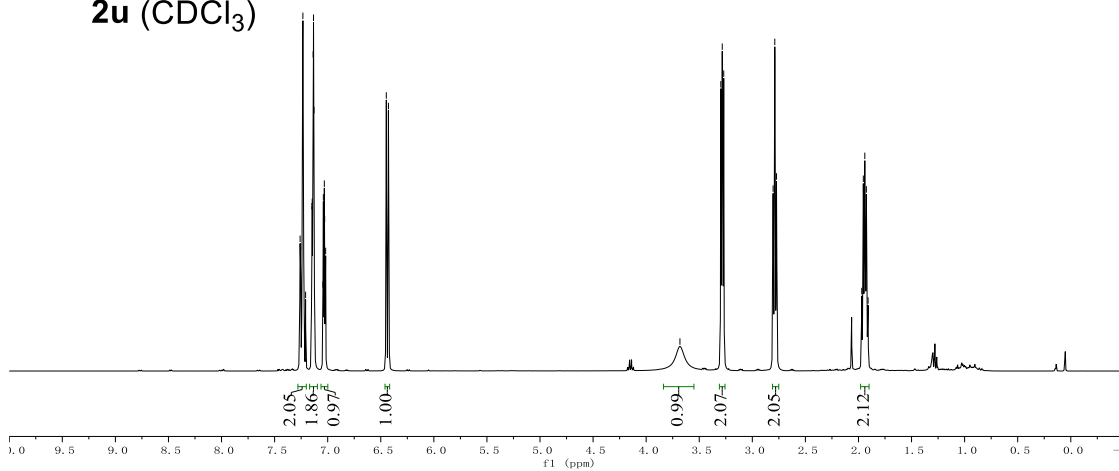

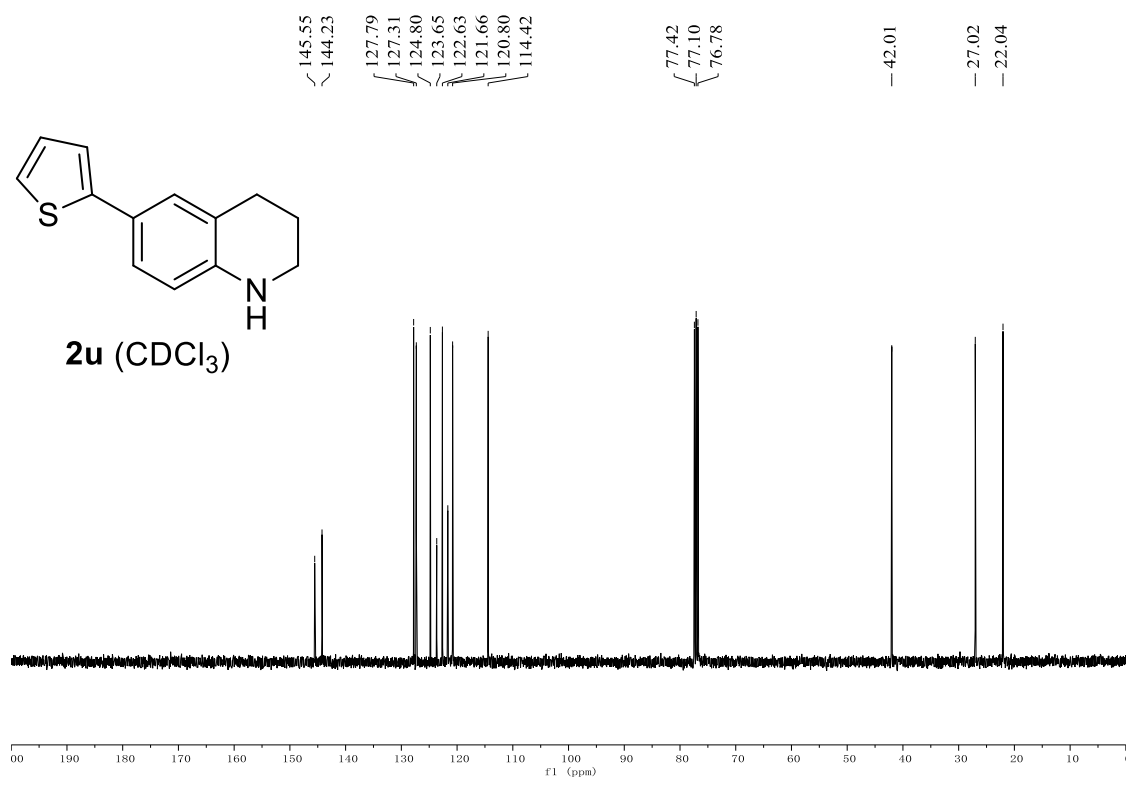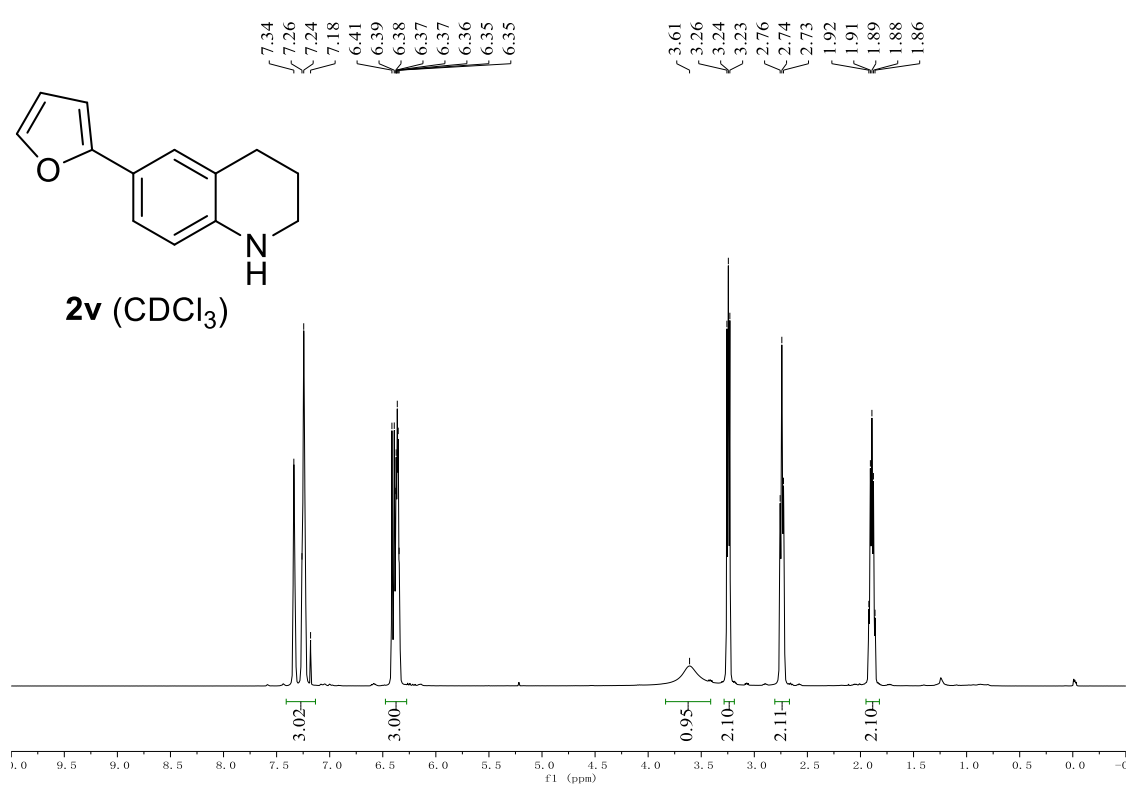

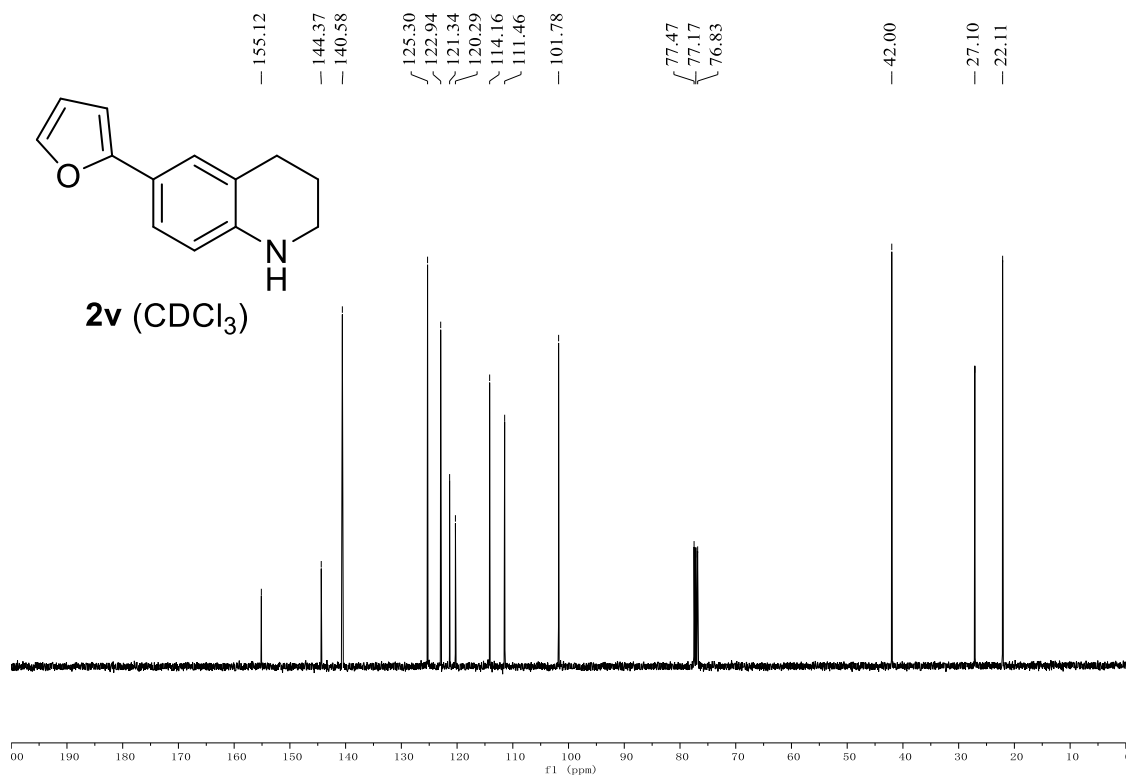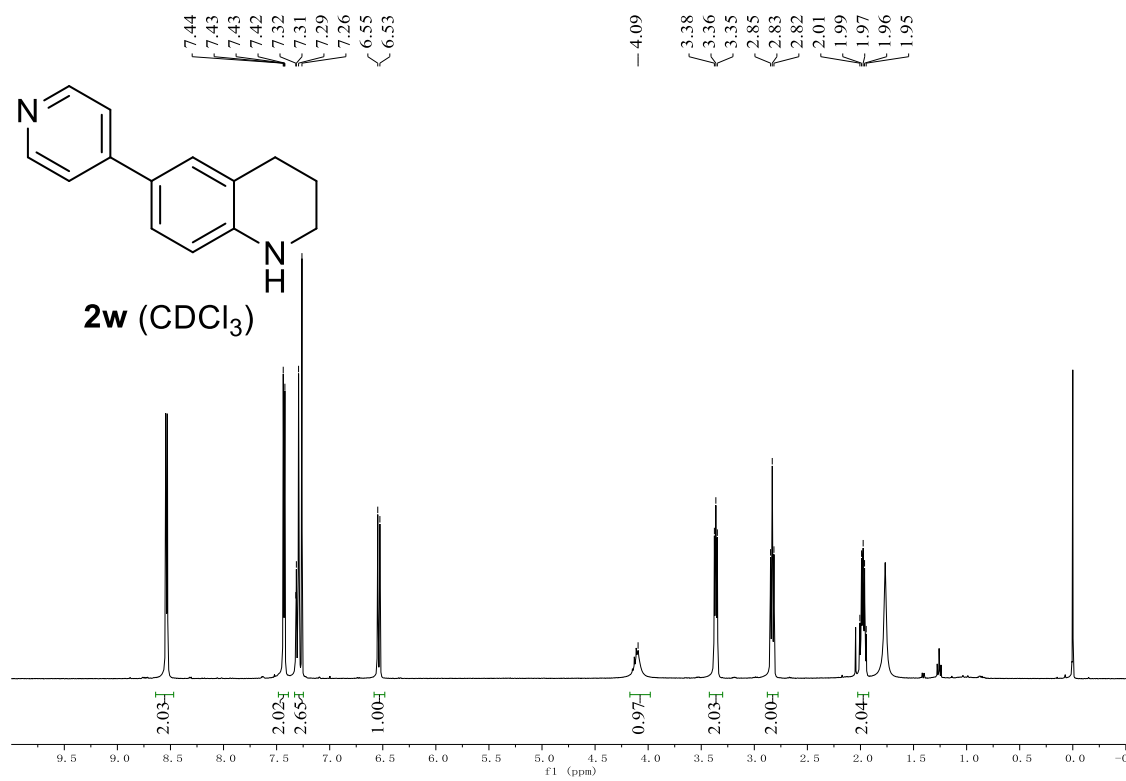



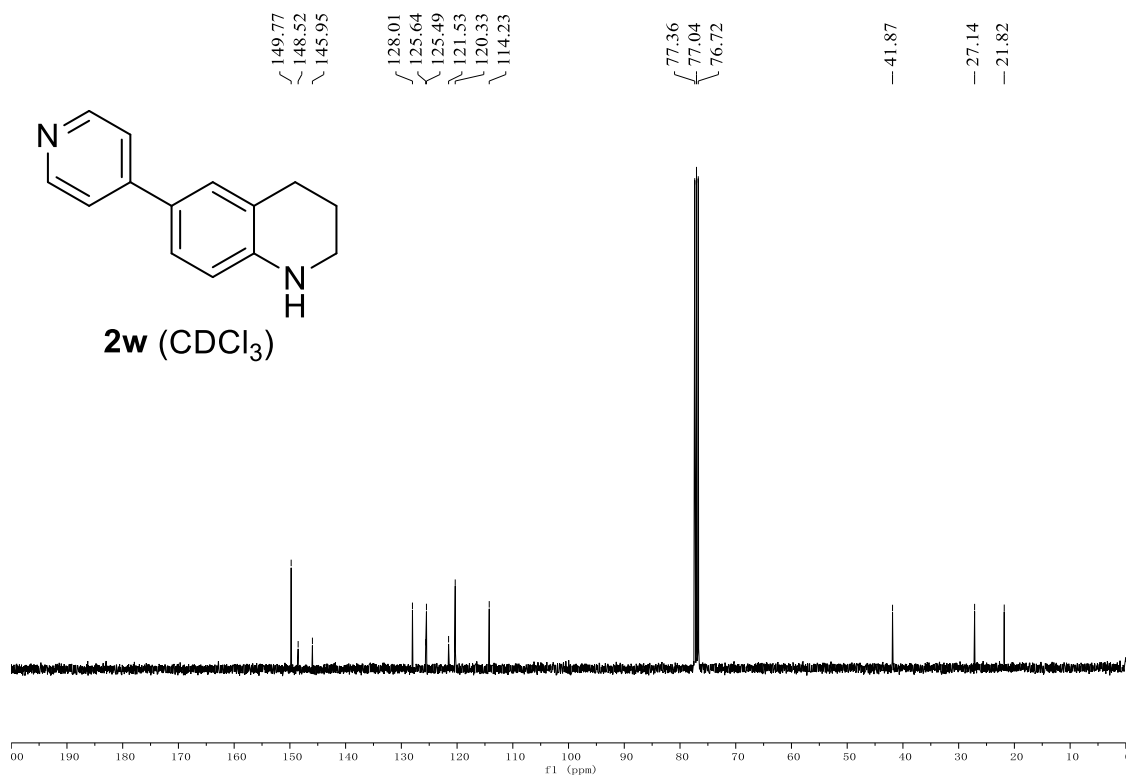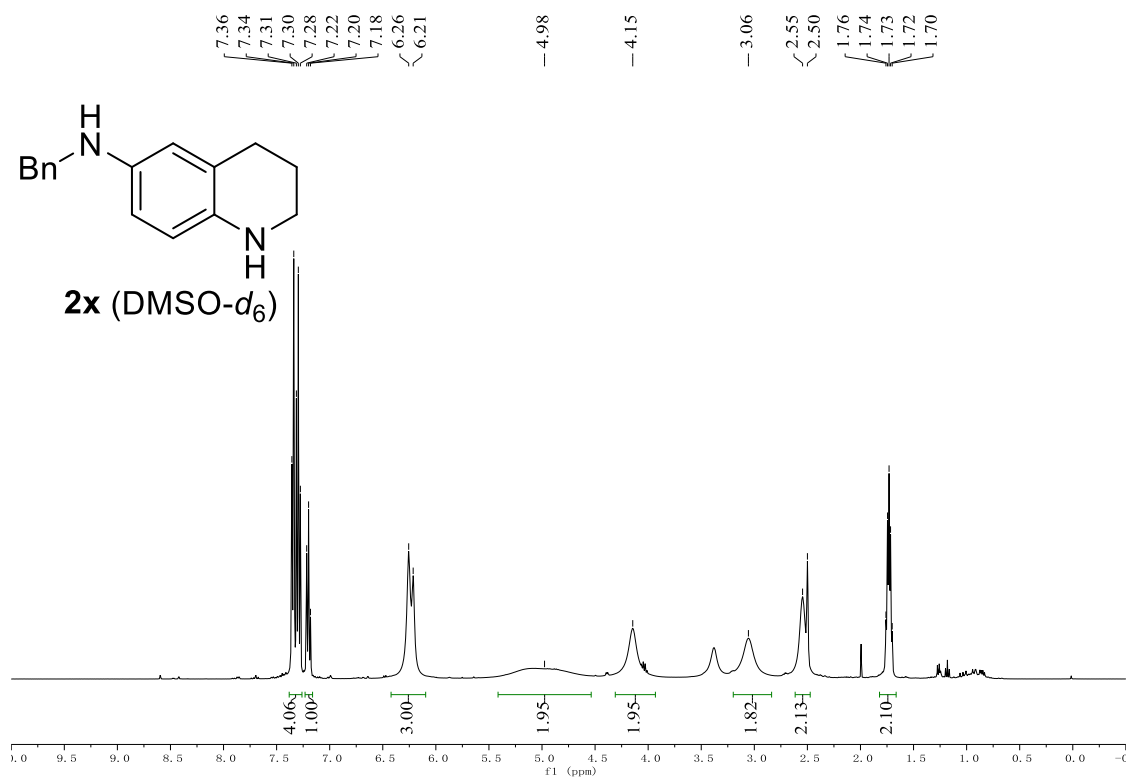

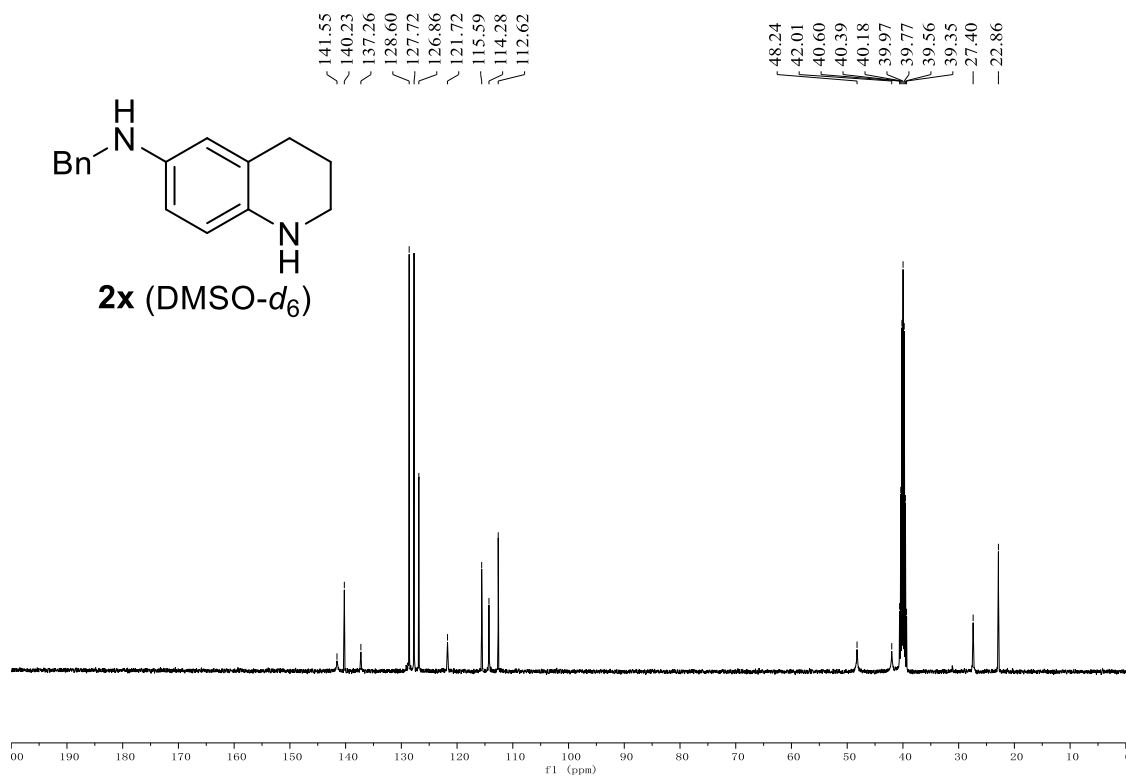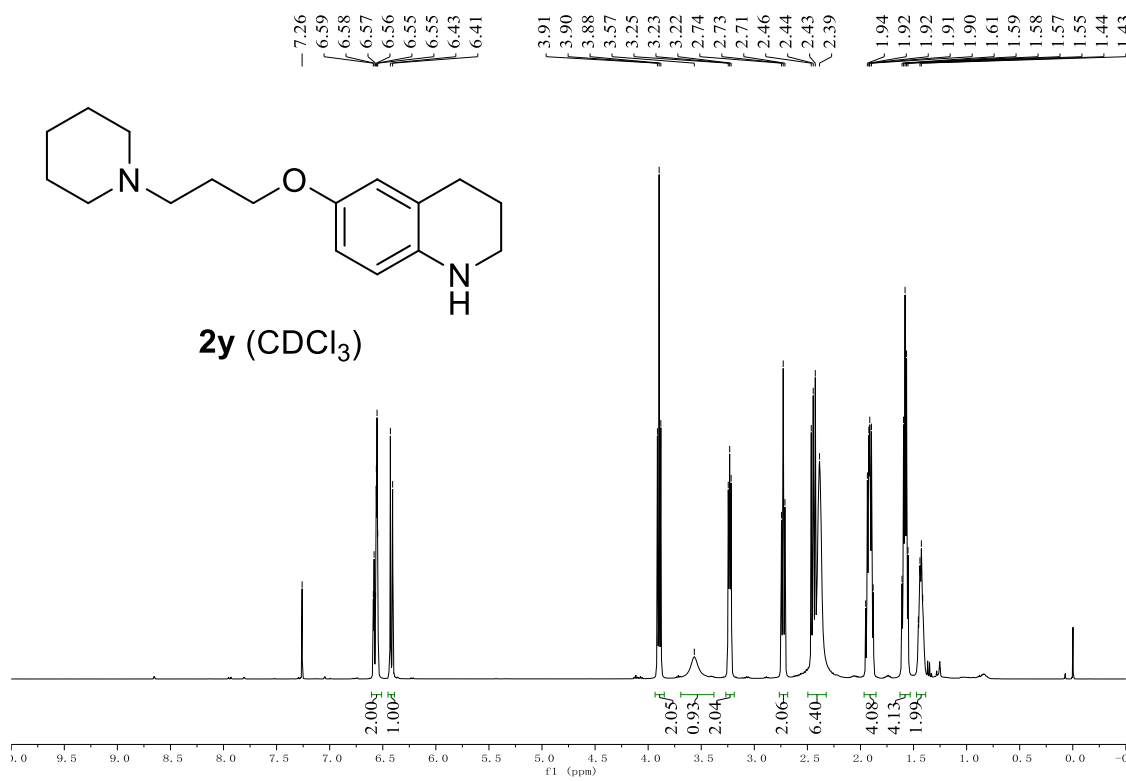

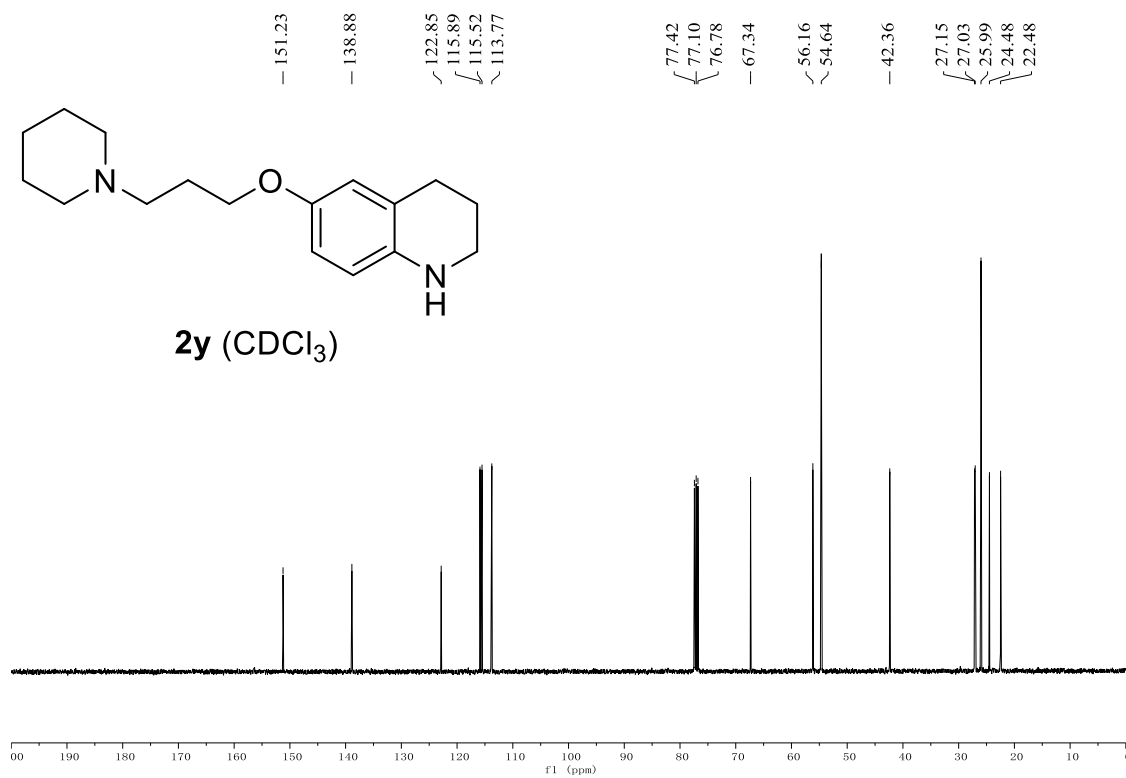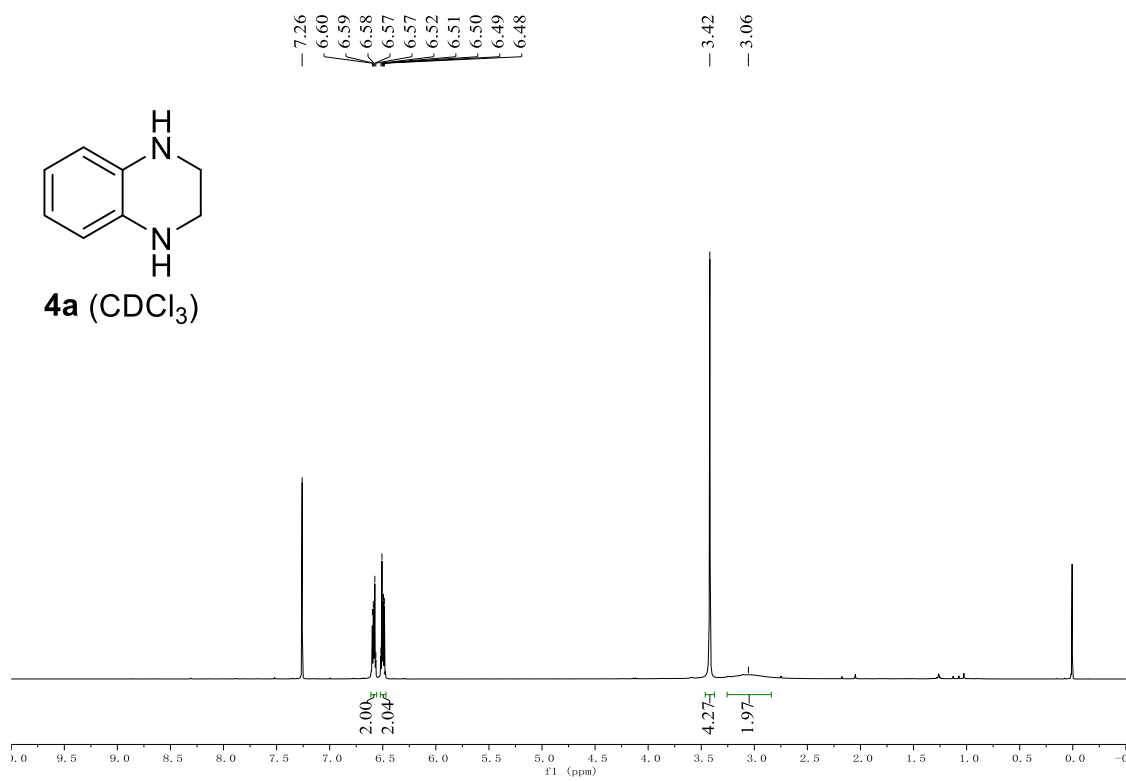

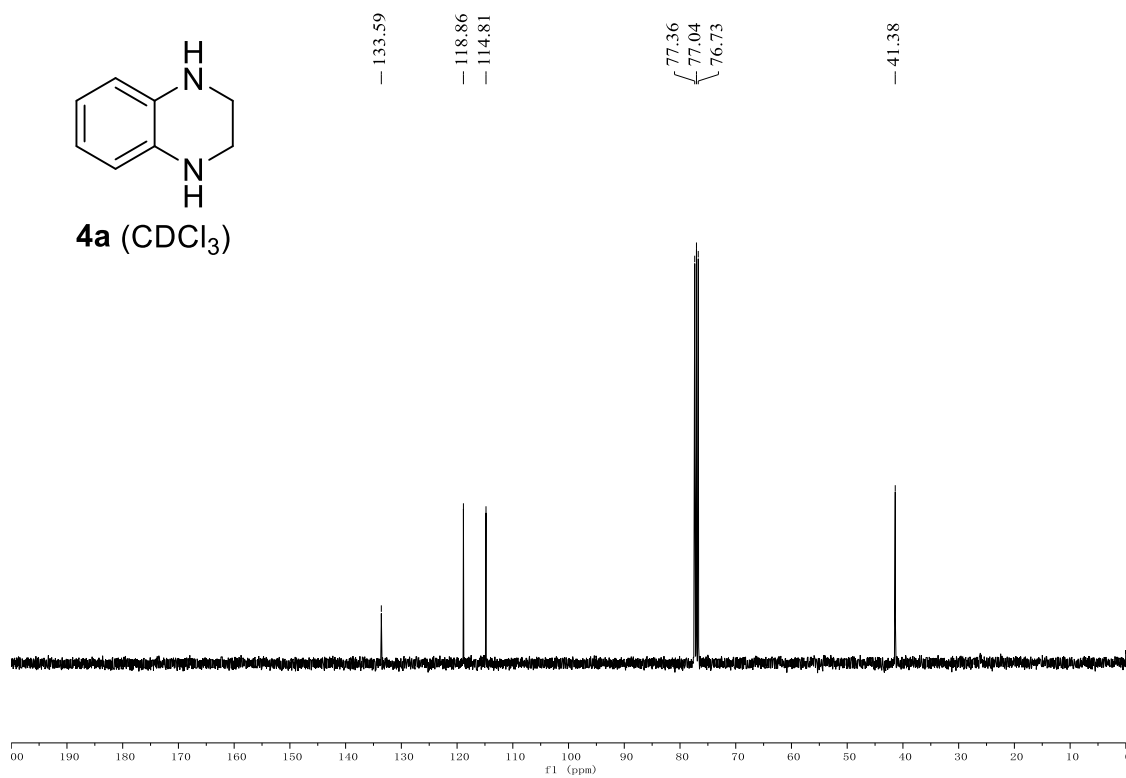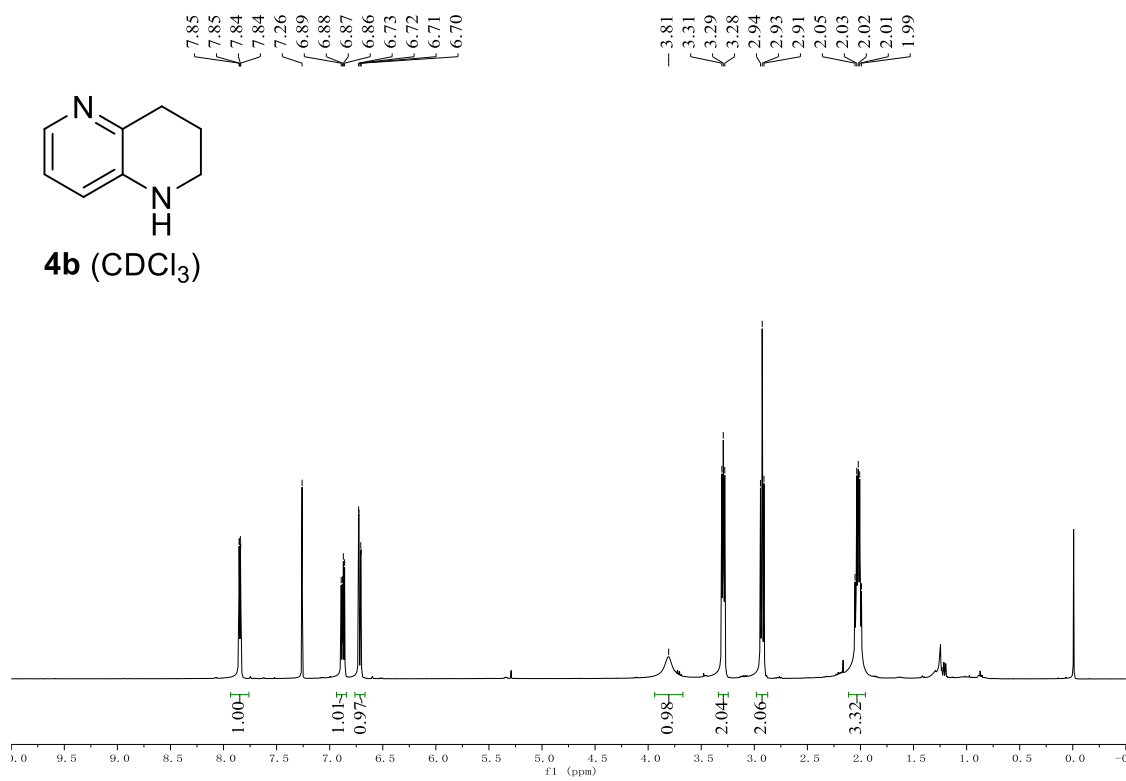

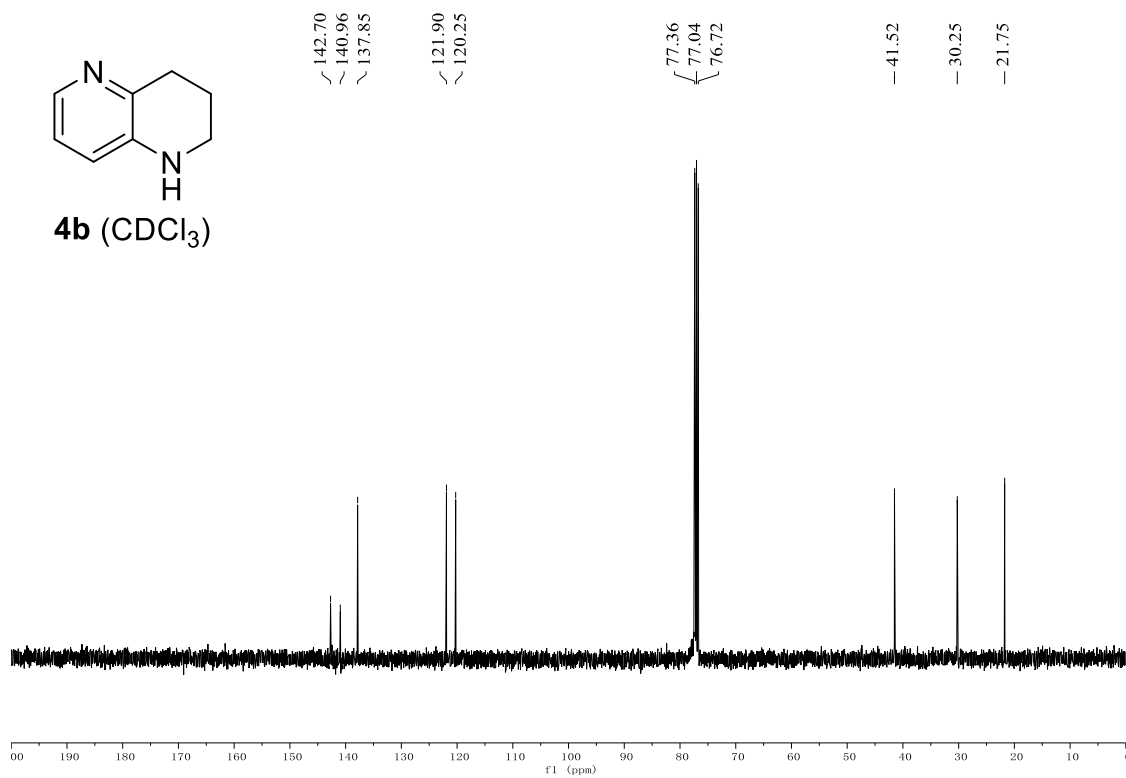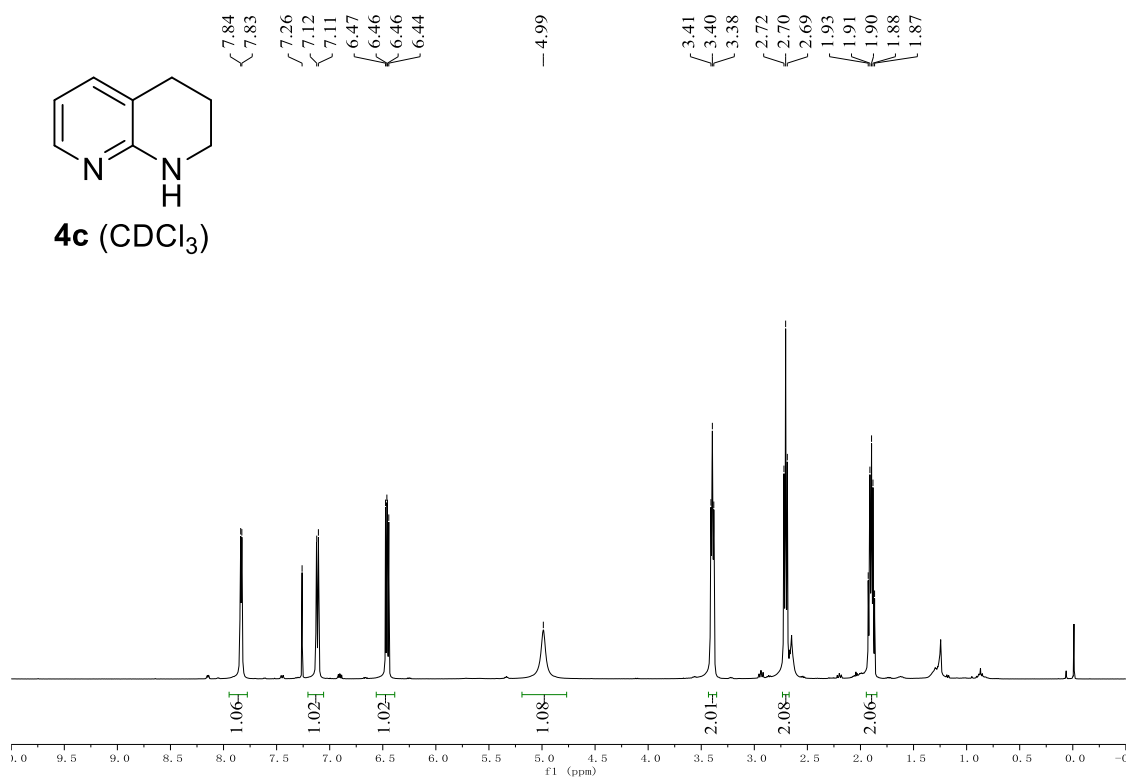

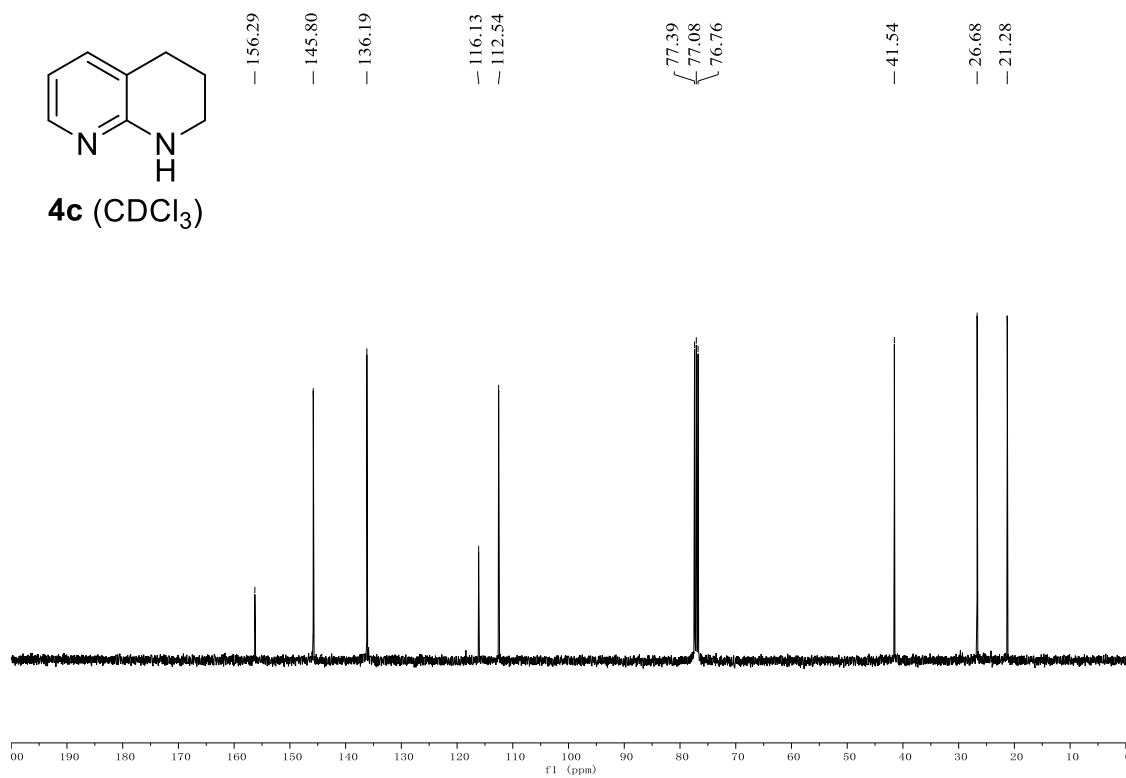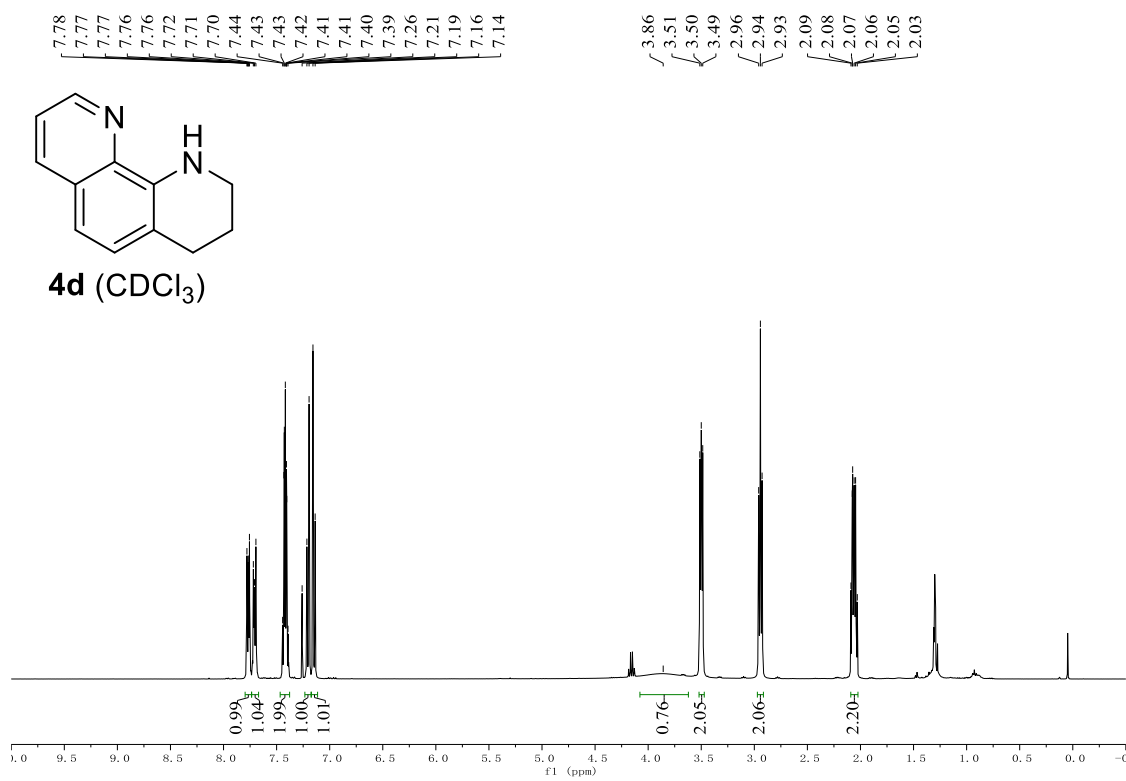

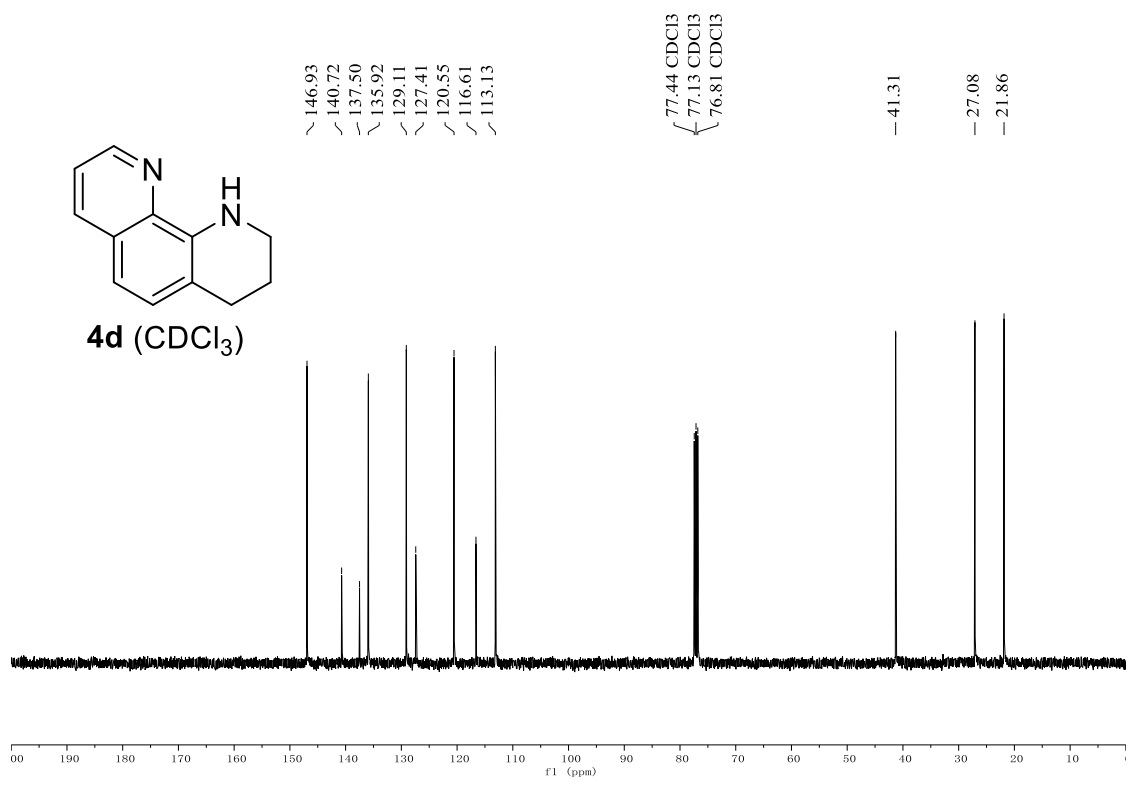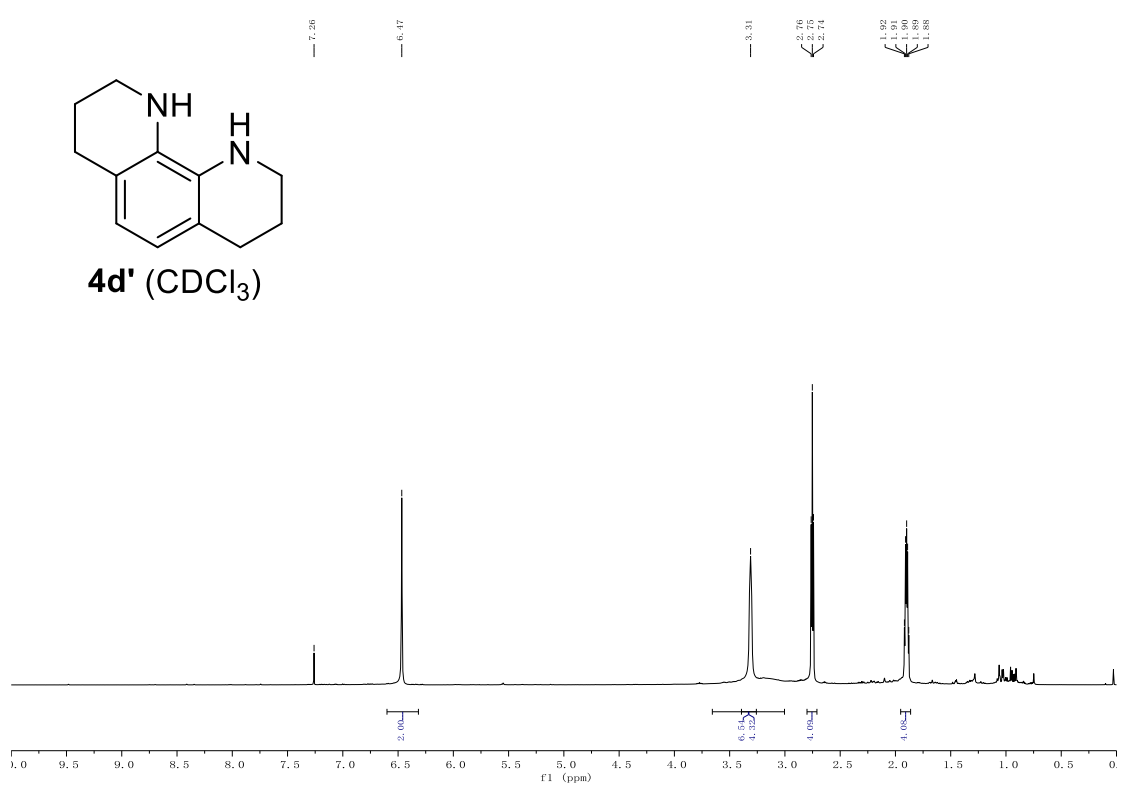

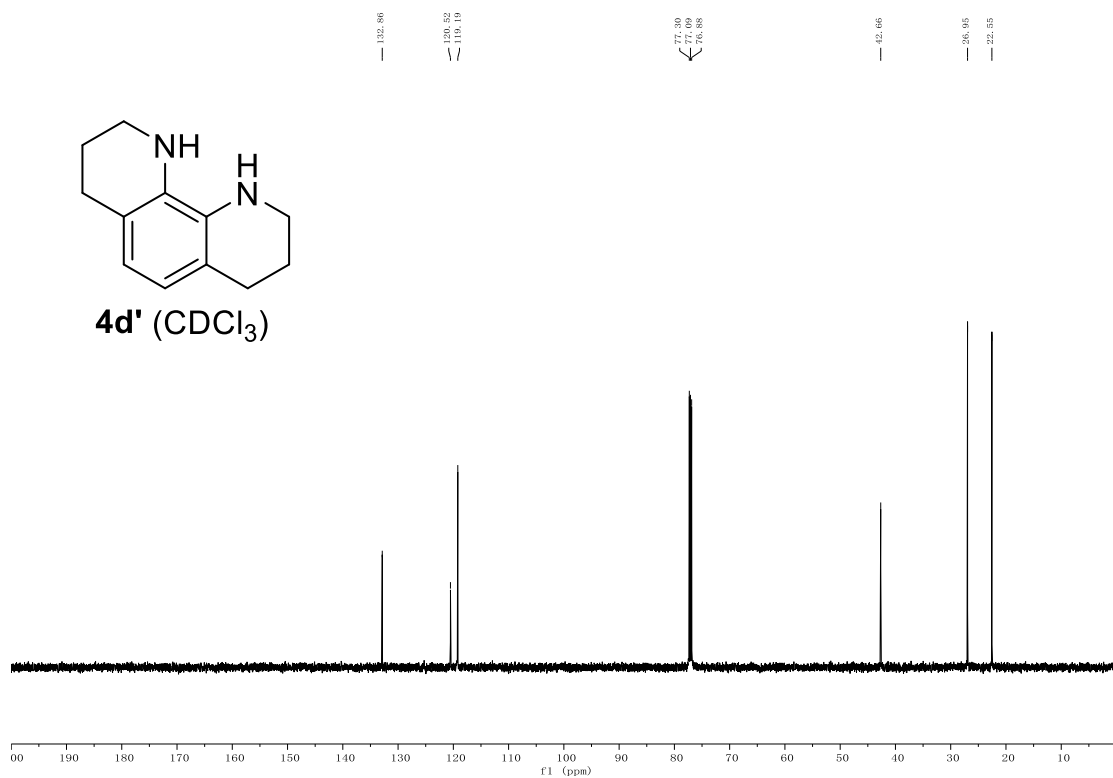



## Energetic Data and Cartesian Coordinates (xyz) for All Optimized Structures

**Table S1.** Computed Energetic Data for All Optimized Structures

| Species                               | Imag        | ZPE      | H <sub>tot_scrf</sub> | G <sub>tot_scrf</sub> |
|---------------------------------------|-------------|----------|-----------------------|-----------------------|
| 1a                                    | 0           | 0.135818 | -401.8799834          | -401.9187374          |
| 1,2-2a                                | 0           | 0.157746 | -403.046004           | -403.085090           |
| 3,4-2a                                | 0           | 0.157962 | -403.047590           | -403.086812           |
| 1,4-2a                                | 0           | 0.181818 | -404.229637           | -404.268844           |
| 1,2,3,4-2a                            | 0           | 0.157746 | -403.046004           | -403.085090           |
| 2A                                    | 0           | 0.108088 | -194.2926926          | -194.3263296          |
| 1A                                    | 0           | 0.083236 | -193.1228383          | -193.1552853          |
| MnH-1 <sub>2K</sub>                   | 0           | 0.488981 | -4163.025949          | -4163.136707          |
| MnH-1 <sub>2K</sub> .dis_CO           | 0           | 0.478742 | -4049.604624          | -4049.710589          |
| MnH-1 <sub>2K</sub> .dis_P            | 0           | 0.488207 | -4162.959635          | -4163.068991          |
| Mn-1 <sub>K</sub>                     | 0           | 0.482424 | -3562.462433          | -3562.565492          |
| MnH-1 <sub>1K</sub> _1a               | 0           | 0.625192 | -4564.918652          | -4565.045227          |
| TS1-1a <sub>2</sub> -H <sup>-</sup>   | 1(-635.673) | 0.623985 | -4564.891994          | -4565.016612          |
| TS1-1a <sub>3</sub> -H <sup>-</sup>   | 1(-640.316) | 0.624806 | -4564.900712          | -4565.024912          |
| TS1-1a <sub>4</sub> -H <sup>-</sup>   | 1(-679.516) | 0.647782 | -4566.079892          | -4566.204046          |
| TS2-2a <sub>2</sub> -H <sup>-</sup>   | 1(-230.035) | 0.647517 | -4566.058396          | -4566.184075          |
| TS2-2a <sub>3</sub> -H <sup>-</sup>   | 1(-703.603) | 0.647650 | -4566.036851          | -4566.161222          |
| TS2-2a <sub>4</sub> -H <sup>-</sup>   | 1(-686.166) | 0.647145 | -4566.045682          | -4566.171069          |
| TS2-2a <sub>2</sub> '-H <sup>-</sup>  | 1(-703.612) | 0.647345 | -4566.043171          | -4566.168096          |
| TS2-2a <sub>3</sub> '-H <sup>-</sup>  | 1(-620.685) | 0.623985 | -4564.891994          | -4565.016612          |
| Mn-1 <sub>1K</sub> _1a-H              | 0           | 0.629068 | -4564.906837          | -4565.031328          |
| Mn-OiPr <sub>O</sub> -1 <sub>2K</sub> | 0           | 0.580327 | -4356.151789          | -4356.270166          |
| TS-1A-H <sup>-</sup>                  | 1(-442.935) | 0.574537 | -4356.143405          | -4356.261907          |
| MnH-1 <sub>2K</sub> _1A               | 0           | 0.57456  | -4356.161621          | -4356.283244          |
| 2H-Mn-5                               | 0           | 0.5385   | -2747.482145          | -2747.574304          |
| Mn-5'                                 | 0           | 0.516942 | -2746.300553          | -2746.392092          |
| 2H-Mn-5_1a                            | 0           | 0.675464 | -3149.371008          | -3149.482214          |
| TSB-1a-H <sub>H</sub> <sup>-</sup>    | 1(-610.087) | 0.674426 | -3149.344324          | -3149.452218          |
| Mn-5-H_1a-H <sub>H</sub>              | 0           | 0.677433 | -3149.342955          | -3149.450523          |
| Mn-5-H_1a-H <sub>N</sub>              | 0           | 0.680257 | -3149.349277          | -3149.457881          |
| TSB-1a-H <sub>N</sub> <sup>+</sup>    | 1(-1027.93) | 0.674303 | -3149.317761          | -3149.425078          |
| Mn-5'_2a <sub>N</sub>                 | 0           | 0.677045 | -3149.350194          | -3149.464419          |
| TSB-1a-H <sub>H</sub> <sup>+</sup>    | 1(-932.978) | 0.67311  | -3149.338411          | -3149.445639          |
| Mn-5'_2a <sub>H</sub>                 | 0           | 0.677391 | -3149.34752           | -3149.459104          |
| Mn-5'_iPrOH <sub>O</sub>              | 0           | 0.627297 | -2940.602085          | -2940.705232          |
| TSB-iPrOH-H <sub>O</sub> <sup>+</sup> | 1(-743.22)  | 0.624301 | -2940.602367          | -2940.704028          |
| H-Mn-5'-OiPr <sub>O</sub>             | 0           | 0.629492 | -2940.618583          | -2940.720528          |
| Mn-5'_iPrOH <sub>H</sub>              | 0           | 0.628024 | -2940.596619          | -2940.703679          |
| TSB-iPrOH-H <sub>H</sub> <sup>+</sup> | 1(-984.169) | 0.623919 | -2940.588146          | -2940.688507          |
| H-Mn-5'-OiPr <sub>H</sub>             | 0           | 0.627546 | -2940.585406          | -2940.686084          |
| TSB-iPrOH-H <sup>-</sup>              | 1(-600.265) | 0.624429 | -2940.583221          | -2940.685283          |
| 2H-Mn-5_1A                            | 0           | 0.623561 | -2940.611466          | -2940.71908           |

**Table S2.** The Cartesian Coordinates (xyz) for All Optimized Structures

|                   |             |               |               |             |             |   |
|-------------------|-------------|---------------|---------------|-------------|-------------|---|
| <b>1a</b>         |             | <b>1,2-2a</b> |               |             |             |   |
| C 6.27146371      | -0.42371054 | 0.20258571    | C 6.31514120  | -0.40301654 | 0.22113238  | C |
| C 5.55693910      | -0.60414163 | -0.96079085   | 5.56163500    | -0.60342229 | -0.93501376 | C |
| C 4.30029457      | -1.25862113 | -0.93835738   | 4.32512272    | -1.25278299 | -0.89755871 | C |
| C 3.77851754      | -1.73183837 | 0.31026598    | 3.82265703    | -1.72015887 | 0.34502997  | C |
| C 4.54033488      | -1.52954113 | 1.48904333    | 4.58452793    | -1.51597357 | 1.50585975  | C |
| C 5.75848568      | -0.88999653 | 1.43461924    | 5.81448697    | -0.86474178 | 1.43856301  | H |
| H 3.88113240      | -1.12929571 | -3.06654506   | 3.88833086    | -1.12852880 | -3.03898833 | H |
| H 7.23956102      | 0.08154918  | 0.17682410    | 7.27914592    | 0.10617676  | 0.17348410  | H |
| H 5.94849988      | -0.24563252 | -1.91683030   | 5.93248857    | -0.25065953 | -1.90189592 | C |
| C 3.51548845      | -1.47691490 | -2.09607015   | 3.50970046    | -1.48296819 | -2.07587852 | H |
| H 4.12377041      | -1.89797266 | 2.42840135    | 4.20257142    | -1.87356725 | 2.46634633  | H |
| H 6.33664860      | -0.73972258 | 2.34938331    | 6.38818911    | -0.71844411 | 2.35719058  | C |
| C 1.88834148      | -2.54799051 | -0.69512022   | 1.74163937    | -2.61861686 | -0.73624795 | C |
| C 2.30715958      | -2.12225541 | -1.97849211   | 2.32331568    | -2.10901845 | -2.01245441 | H |
| H 0.92530712      | -3.06410641 | -0.58899338   | 1.53566882    | -3.70663120 | -0.82832898 | H |
| H 1.67545728      | -2.30795027 | -2.84946258   | 1.72890850    | -2.26937588 | -2.91502206 | N |
| N 2.58148930      | -2.36794687 | 0.40581005    | 2.60985643    | -2.35789584 | 0.39009947  | H |
|                   |             |               | 2.29526302    | -2.67559379 | 1.29580454  | H |
|                   |             |               | 0.74106305    | -2.16282441 | -0.57445916 |   |
| <b>3,4-2a</b>     |             | <b>1,4-2a</b> |               |             |             |   |
| C -2.48007200     | 0.71959300  | 0.00003900    | C -2.47846900 | -0.71037500 | -0.00004700 |   |
| C -1.25715900     | 1.39023400  | -0.00000400   | C -1.25867700 | -1.38622000 | -0.00002100 |   |
| C -0.04795800     | 0.69298900  | -0.00004600   | C -0.03533800 | -0.71391300 | 0.00002700  |   |
| C -0.07885800     | -0.71450700 | -0.00011800   | C -0.05573500 | 0.69778400  | 0.00004700  |   |
| C -1.31028700     | -1.38361100 | -0.00000600   | C -1.28028300 | 1.38216900  | 0.00001700  |   |
| C -2.50698900     | -0.67503200 | 0.00006600    | C -2.48241400 | 0.68383500  | -0.00002200 |   |
| H 1.28471300      | 2.10994500  | -0.86936300   | H -3.41708700 | -1.26785100 | -0.00008500 |   |
| H -3.41263100     | 1.28870300  | 0.00008600    | H -1.24741700 | -2.48068500 | -0.00003900 |   |
| H -1.23881400     | 2.48489700  | 0.00000500    | C 1.26741600  | -1.48303800 | 0.00007700  |   |
| C 1.26402000      | 1.43312900  | -0.00006900   | H -1.27713800 | 2.47598500  | 0.00002400  |   |
| H -1.29123000     | -2.47550300 | 0.00000300    | H -3.42593000 | 1.23448400  | -0.00003800 |   |
| H -3.46033400     | -1.20816600 | 0.00012100    | C 2.35846600  | 0.75002700  | -0.00005400 |   |
| C 2.22128200      | -0.93661000 | 0.00001300    | C 2.46602200  | -0.58816500 | -0.00006900 |   |
| C 2.50293300      | 0.53312200  | 0.00014900    | N 1.13916000  | 1.40068600  | 0.00005700  |   |
| H 3.15449500      | 0.74247700  | 0.86547300    | H 3.46189700  | -1.03294500 | -0.00015700 |   |
| N 1.08225100      | -1.50833400 | -0.00008200   | H 3.23166100  | 1.40428500  | -0.00013900 |   |
| H 1.28461900      | 2.11022500  | 0.86900600    | H 1.10669800  | 2.40874700  | -0.00001800 |   |
| H 3.15484900      | 0.74258400  | -0.86487800   | H 1.29366800  | -2.16961700 | 0.86985600  |   |
| H 3.10711400      | -1.59266000 | -0.00001600   | H 1.29360800  | -2.16983200 | -0.86952900 |   |
| <b>1,2,3,4-2a</b> |             |               |               |             |             |   |
| C -2.58123800     | 0.69237000  | -0.00005600   |               |             |             |   |
| C -1.36917100     | 1.37801600  | -0.00009700   |               |             |             |   |
| C -0.13866400     | 0.71664900  | -0.00005600   |               |             |             |   |
| C -0.12639500     | -0.69197300 | 0.00000600    |               |             |             |   |
| C -1.35329000     | -1.38746900 | 0.00005800    |               |             |             |   |
| C -2.56107700     | -0.70412500 | 0.00004000    |               |             |             |   |
| H 1.13363400      | 2.17859700  | -0.86837300   |               |             |             |   |
| H -3.52686200     | 1.23757600  | -0.00008500   |               |             |             |   |
| H -1.36630000     | 2.47310200  | -0.00015200   |               |             |             |   |
| C 1.14277500      | 1.49953300  | -0.00006900   |               |             |             |   |
| H -1.33972100     | -2.48161800 | 0.00011800    |               |             |             |   |
| H -3.49629700     | -1.26958200 | 0.00007900    |               |             |             |   |
| C 2.38241500      | -0.83544700 | -0.00008300   |               |             |             |   |
| C 2.45592200      | 0.70177400  | 0.00019400    |               |             |             |   |

|                           |             |             |             |                         |             |             |             |
|---------------------------|-------------|-------------|-------------|-------------------------|-------------|-------------|-------------|
| H                         | 2.93629300  | -1.21948700 | 0.87599500  |                         |             |             |             |
| H                         | 3.05452100  | 1.00922100  | 0.86829400  |                         |             |             |             |
| N                         | 1.05510900  | -1.38818900 | 0.00004700  |                         |             |             |             |
| H                         | 1.13348000  | 2.17883700  | 0.86804300  |                         |             |             |             |
| H                         | 3.05499900  | 1.00946500  | -0.86748600 |                         |             |             |             |
| H                         | 2.93604200  | -1.21919900 | -0.87645300 |                         |             |             |             |
| H                         | 0.98678400  | -2.39554100 | 0.00007000  |                         |             |             |             |
| <b>2A</b>                 |             |             |             | <b>1A</b>               |             |             |             |
| C                         | -0.00187997 |             | 0.04489746  | C                       | -0.98962179 | 1.86266121  | 1.24613524  |
| 0.35771399                |             | H           | 0.00619659  | H                       | -1.37208115 | 2.88826333  | 1.21044933  |
| 0.08373572                | 1.46905181  |             | C           | H                       | -1.32806191 | 1.38030015  | 2.17497759  |
| -1.32105728               | -0.54117936 | -0.08597122 | H           | H                       | 0.10892310  | 1.88516052  | 1.29704218  |
| -2.15631620               |             |             | 0.08896422  | C                       | -0.98971558 | -0.34961192 | -0.03106975 |
| 0.24532521                |             | H           | -1.36270013 | H                       | -1.32559450 | -0.91227020 | 0.85241527  |
| -0.60111839               | -1.18311457 | H           | -1.46675359 | H                       | -1.37431473 | -0.83225032 | -0.93580834 |
| -1.55083315               | 0.32007482  | C           | 1.18455122  | H                       | 0.10886644  | -0.40460603 | -0.02802683 |
| -0.78173029               | -0.09981135 | H           | 1.20799902  | C                       | -1.45183949 | 1.08284145  | 0.04234650  |
| -0.84654440               | -1.19758117 | H           | 2.13574386  | O                       | -2.15175298 | 1.57676690  | -0.81313980 |
| -0.33646913               | 0.22907415  | H           | 1.14850440  |                         |             |             |             |
| -1.80412153               | 0.30238413  | O           | 0.05352245  |                         |             |             |             |
| 1.35937166                | -0.17006954 | H           | 0.89329463  |                         |             |             |             |
| 1.74752020                | 0.09663173  |             |             |                         |             |             |             |
| <b>MnH-1<sub>2k</sub></b> |             |             |             | <b>Mn-1<sub>k</sub></b> |             |             |             |
| Mn                        | 1.68272736  | 0.91274884  | -0.09674341 | Mn                      | -0.01602802 |             | -0.65918331 |
| C                         | 0.41176949  | -1.57136934 | -1.22127870 | -0.02356993             | C           | 1.23010719  | 2.05830548  |
| C                         | -1.00480825 | 0.29922745  | -1.30062418 | -0.08318970             | C           | -1.16026790 | 2.07569678  |
| N                         | 0.21100904  | -0.24159771 | -1.01876731 | -0.03511524             |             | N           | 0.01105536  |
| N                         | -0.53653061 | -2.33714966 | -1.87768919 | 1.35985922              | -0.11449050 |             | N           |
| N                         | -1.97157732 | -0.44117176 | -1.95895655 | 1.23037844              |             |             | 3.42430595  |
| C                         | -1.65533059 | -1.70603115 | -2.22384252 | -0.05002451             | N           | -1.15407473 | 3.43523435  |
| N                         | -1.30246967 | 1.54603511  | -0.95779634 | 0.02600318              |             | C           | 0.06225491  |
| N                         | 1.51638252  | -2.17477966 | -0.80154728 | 4.02024769              | 0.00494962  |             | N           |
| P                         | -0.02454544 | 2.33133760  | -0.11241420 | -2.35159615             |             |             | 1.46212046  |
| P                         | 2.58877469  | -1.11240213 | 0.02800214  | -0.02013341             |             | N           | 2.37514059  |
| C                         | 2.67780315  | -1.95644098 | 1.70198109  | 1.41969184              | -0.09387204 |             | P           |
| H                         | 1.59721442  | -2.07675906 | 1.89839535  | -2.23015864             |             |             | -0.22094146 |
| C                         | 4.21391877  | -1.58037734 | -0.77386075 | -0.15581539             |             | P           | 2.22075137  |
| H                         | 4.37199612  | -2.65506822 | -0.56086766 | -0.25664620             | -0.18937051 | C           | 2.98097766  |
| C                         | 3.23909966  | -1.06751273 | 2.79920824  | -0.63482805             | -1.85384522 | H           | 2.20928696  |
| H                         | 3.15690983  | -1.56108409 | 3.78080614  | -0.26417769             | -2.55482239 | C           | 3.43202873  |
| H                         | 4.30219988  | -0.82546977 | 2.64940002  | -0.94019213             | 1.04302683  |             | H           |
| H                         | 2.69309275  | -0.11636431 | 2.85213654  | 4.41728931              |             |             | -0.90233162 |
| C                         | 3.31727221  | -3.33425274 | 1.69400530  | 0.54181150              |             | C           | 3.17573037  |
| H                         | 4.41179623  | -3.28276022 | 1.57977716  | -2.12308500             | -2.09476491 | H           | 3.98391350  |
| H                         | 3.12552540  | -3.86744579 | 2.63935192  | -2.52754395             | -1.46589791 | H           | 2.27052625  |
| H                         | 2.92957405  | -3.96674296 | 0.87833099  | -2.71435465             | -1.89479154 | H           | 3.46851497  |
| C                         | 5.36023462  | -0.77927948 | -0.17677135 | -2.31055841             | -3.13914936 | C           | 4.25602975  |
| H                         | 5.18294388  | 0.30166536  | -0.29199842 | 0.15663809              | -2.09753301 |             | H           |
| H                         | 5.49944353  | -0.97293570 | 0.89641345  | 5.07260849              |             |             | -0.18143745 |
| H                         | 6.31393327  | -1.01241173 | -0.67611471 | -1.44068188             |             | H           | 4.60271762  |
| C                         | 4.14824357  | -1.40570824 | -2.28274072 | 0.01871789              | -3.13340561 |             | H           |
| H                         | 5.07095970  | -1.77544469 | -2.75857020 | 4.10820159              |             |             | 1.22820027  |
| H                         | 3.29784905  | -1.94844140 | -2.72282237 | -1.91521432             |             | C           | 3.10527771  |
| H                         | 4.03630480  | -0.35005617 | -2.56540600 | -2.38630039             | 1.39221882  |             | H           |
| C                         | -0.88667571 | 2.72593093  | 1.50734116  | 2.18145139              |             |             | -2.45037288 |
| H                         | -1.28848101 | 1.72347345  | 1.74046779  | 1.98522633              |             | H           | 2.96517185  |

|                                  |             |             |             |                                 |               |             |             |
|----------------------------------|-------------|-------------|-------------|---------------------------------|---------------|-------------|-------------|
| C                                | 0.02589293  | 3.98355362  | -0.99198396 | -3.02790670                     | 0.51119130    |             | H           |
| H                                | -0.92987103 | 4.49619092  | -0.77306023 | 3.91094302                      |               |             | -2.82849089 |
| C                                | 0.06671767  | 3.10263812  | 2.62858301  | 1.99797856                      |               | C           | 3.48643358  |
| H                                | -0.47149938 | 3.18515110  | 3.58640070  | -0.05971956                     | 2.28116927    |             | H           |
| H                                | 0.85438346  | 2.34698812  | 2.74802054  | 4.21891363                      |               |             | -0.45609978 |
| H                                | 0.56238378  | 4.07018892  | 2.45653774  | 3.00073033                      |               | H           | 3.76205608  |
| C                                | -2.05198025 | 3.69404402  | 1.39729406  | 0.97251673                      | 2.03231528    |             | H           |
| H                                | -2.71828902 | 3.44763722  | 0.55410320  | 2.51195539                      |               |             | -0.03096122 |
| H                                | -2.66592493 | 3.68372621  | 2.31254784  | 2.79204603                      |               | C           | -3.05492085 |
| H                                | -1.71429624 | 4.73351030  | 1.25885464  | -0.56945972                     | -1.80153241   |             | H           |
| C                                | 1.17653665  | 4.82647341  | -0.46302255 | -2.29140979                     |               |             | -0.23327890 |
| H                                | 2.14098968  | 4.32813784  | -0.64741963 | -2.52728384                     |               | C           | -3.44134980 |
| H                                | 1.21189579  | 5.81024106  | -0.95717313 | -0.91964749                     | 1.07934941    |             | H           |
| H                                | 1.10932338  | 5.00616385  | 0.61959908  | -4.43639795                     |               |             | -0.88315446 |
| C                                | 0.12828403  | 3.80440297  | -2.49837793 | 0.59524640                      |               | C           | -3.30874081 |
| H                                | -0.70294580 | 3.20570990  | -2.90049114 | -2.05132933                     | -2.02863217   |             | H           |
| H                                | 0.11975239  | 4.78147965  | -3.00793371 | -3.62507596                     |               |             | -2.23763878 |
| H                                | 1.06000633  | 3.29671527  | -2.78440024 | -3.06615439                     |               | H           | -2.41795732 |
| C                                | 2.49850267  | 1.48932335  | -1.57230878 | -2.66775641                     | -1.84127785   |             | H           |
| O                                | 3.08465632  | 1.91894202  | -2.49967160 | -4.11646594                     |               |             | -2.42654461 |
| C                                | 2.77616487  | 1.79173993  | 0.97808475  | -1.38112227                     | C -4.30925639 | 0.25803017  |             |
| O                                | 3.48062233  | 2.36339347  | 1.72165827  | -2.03028829                     | H -4.09714100 | 1.33457316  |             |
| H                                | 0.93756777  | 0.40011307  | 1.26993305  | -1.97465414                     | H -4.73795915 | 0.05272173  |             |
| C                                | -2.65578280 | -2.49702596 | -3.01482482 | -3.02346194                     | H -5.09478484 | 0.02635948  |             |
| H                                | -3.67974888 | -2.14593209 | -2.83406593 | -1.29230923                     |               | C           | -3.10612169 |
| H                                | -2.46070451 | -2.39271315 | -4.09363486 | -2.37130857                     | 1.40198953    |             | H           |
| H                                | -2.60181588 | -3.56692890 | -2.77649179 | -2.18718103                     |               |             | -2.43842020 |
| K                                | 1.05724614  | -4.46210777 | -1.85116125 | 2.00118044                      |               | H           | -3.91369867 |
| K                                | -3.57834485 | 1.66663687  | -2.12123174 | -2.83437528                     | 1.98923844    |             | H           |
|                                  |             |             |             | -2.94895043                     |               |             | -2.99077145 |
|                                  |             |             |             | 0.50903755                      |               | C           | -3.48711267 |
|                                  |             |             |             | -0.08037837                     | 2.34636431    |             | H           |
|                                  |             |             |             | -3.83373968                     |               |             | 0.94503072  |
|                                  |             |             |             | 2.15673750                      |               | H           | -4.16521680 |
|                                  |             |             |             | -0.53405898                     | 3.08524725    |             | H           |
|                                  |             |             |             | -2.49515648                     |               |             | -0.00865785 |
|                                  |             |             |             | 2.81675768                      |               | C           | -0.01309966 |
|                                  |             |             |             | -0.95969069                     | 1.68795492    |             | O           |
|                                  |             |             |             | -0.01883270                     |               |             | -1.13257764 |
|                                  |             |             |             | 2.84715953                      |               | C           | -0.03326297 |
|                                  |             |             |             | -2.40309448                     | -0.35626020   |             | O           |
|                                  |             |             |             | -0.05551550                     |               |             | -3.54981393 |
|                                  |             |             |             | -0.58871228                     | C 0.06096716  | 5.51722860  |             |
|                                  |             |             |             | 0.05449166                      | H             | -0.51313596 |             |
|                                  |             |             |             | 5.93493398                      | -0.78567381   |             | H           |
|                                  |             |             |             | -0.41874898                     |               |             | 5.87517519  |
|                                  |             |             |             | 0.97771249                      |               | H           | 1.08367952  |
|                                  |             |             |             | 5.90525374                      | 0.01590467    |             | K           |
|                                  |             |             |             | -3.74799563                     | 3.62711464    | 0.32248713  |             |
| <b>MnH-1<sub>2k</sub>.dis_CO</b> |             |             |             | <b>MnH-1<sub>2k</sub>.dis_P</b> |               |             |             |
| Mn                               | -1.14273700 | 0.12296800  | 0.00000000  | Mn                              | -0.13724500   | -1.23708700 | 0.09134200  |
| C                                | 1.58842500  | 0.02693800  | 1.18171900  | C                               | 1.18785600    | 1.51970500  | -0.31901300 |
| C                                | 1.58842500  | 0.02693800  | -1.18171900 | C                               | -1.14193500   | 1.45781200  | -0.65342600 |
| N                                | 0.89902600  | 0.12580700  | 0.00000000  | N                               | 0.03090800    | 0.78808900  | -0.47094500 |
| N                                | 2.97227900  | 0.00170000  | 1.19102300  | N                               | 1.10467700    | 2.90015200  | -0.15752900 |
| N                                | 2.97227900  | 0.00170000  | -1.19102300 | N                               | -1.16540300   | 2.82089400  | -0.85434300 |
| C                                | 3.56640700  | 0.01206900  | 0.00000000  | C                               | -0.04006300   | 3.45879400  | -0.51012700 |

|                              |             |             |             |                              |             |             |             |
|------------------------------|-------------|-------------|-------------|------------------------------|-------------|-------------|-------------|
| N                            | 0.95646200  | -0.04749500 | -2.34435400 | N                            | -2.32406700 | 0.83861200  | -0.60906700 |
| N                            | 0.95646200  | -0.04749500 | 2.34435400  | N                            | 2.39283400  | 1.02238800  | -0.22406000 |
| P                            | -0.77065800 | -0.04948900 | -2.14816700 | P                            | -2.25344900 | -0.74010100 | 0.01966400  |
| P                            | -0.77065800 | -0.04948900 | 2.14816700  | P                            | 3.04635900  | -0.51814000 | 0.01430500  |
| C                            | -1.21925600 | -1.60969400 | 3.07745500  | C                            | 2.27235100  | -1.66516600 | -1.25543100 |
| H                            | -0.54092800 | -2.32846600 | 2.58354500  | H                            | 1.15441600  | -1.54335500 | -1.18085700 |
| C                            | -1.21381700 | 1.33146600  | 3.33932700  | C                            | 4.73375700  | -0.14637500 | -0.73613400 |
| H                            | -0.65359800 | 1.16561800  | 4.28088200  | H                            | 4.56711000  | 0.26505900  | -1.74766000 |
| C                            | -2.64263800 | -2.05608400 | 2.78494800  | C                            | 2.56465300  | -3.13439100 | -0.99396700 |
| H                            | -2.83782100 | -3.05699300 | 3.20251800  | H                            | 1.86640000  | -3.77566300 | -1.55423000 |
| H                            | -3.39478100 | -1.37464300 | 3.20970500  | H                            | 3.58203800  | -3.41468600 | -1.30486400 |
| H                            | -2.81362400 | -2.09093500 | 1.69976900  | H                            | 2.45827300  | -3.39178300 | 0.06942600  |
| C                            | -0.89359400 | -1.58561400 | 4.56080200  | C                            | 2.51409100  | -1.25566700 | -2.69980300 |
| H                            | -1.55824100 | -0.90934400 | 5.12126300  | H                            | 3.55939000  | -1.42584700 | -3.00089800 |
| H                            | -1.00439000 | -2.58427600 | 5.01484800  | H                            | 1.87969300  | -1.83958700 | -3.38497800 |
| H                            | 0.14072400  | -1.25323000 | 4.74954300  | H                            | 2.28432000  | -0.19208900 | -2.86052300 |
| C                            | -2.70533300 | 1.37318200  | 3.63324500  | C                            | 5.59563100  | -1.39505300 | -0.82499100 |
| H                            | -3.29519800 | 1.36665700  | 2.70223700  | H                            | 5.64968200  | -1.91967500 | 0.14334900  |
| H                            | -3.04256200 | 0.51796000  | 4.23577500  | H                            | 5.22193900  | -2.11716600 | -1.56381800 |
| H                            | -2.97776600 | 2.28538600  | 4.18839500  | H                            | 6.62856000  | -1.14675800 | -1.11592100 |
| C                            | -0.74612300 | 2.63655100  | 2.71257900  | C                            | 5.41402700  | 0.92727900  | 0.09952600  |
| H                            | -0.92847600 | 3.49882400  | 3.37426600  | H                            | 6.41341300  | 1.17042800  | -0.29492700 |
| H                            | 0.32711500  | 2.61382200  | 2.46996300  | H                            | 4.82555000  | 1.85587700  | 0.10855900  |
| H                            | -1.29029900 | 2.82383000  | 1.77179400  | H                            | 5.55663100  | 0.59085500  | 1.14233100  |
| C                            | -1.21925600 | -1.60969400 | -3.07745500 | C                            | -3.36963700 | -1.67209000 | -1.15817400 |
| H                            | -0.54092800 | -2.32846600 | -2.58354500 | H                            | -2.96847700 | -1.30143500 | -2.11794800 |
| C                            | -1.21381700 | 1.33146600  | -3.33932700 | C                            | -3.31145000 | -0.56675500 | 1.55795700  |
| H                            | -0.65359800 | 1.16561800  | -4.28088200 | H                            | -4.29517000 | -0.19999600 | 1.20932000  |
| C                            | -2.64263800 | -2.05608400 | -2.78494800 | C                            | -3.18120700 | -3.17955500 | -1.13847100 |
| H                            | -2.83782100 | -3.05699300 | -3.20251800 | H                            | -3.81334900 | -3.65754600 | -1.90333300 |
| H                            | -2.81362400 | -2.09093500 | -1.69976900 | H                            | -2.13914200 | -3.45144900 | -1.34855800 |
| H                            | -3.39478100 | -1.37464300 | -3.20970500 | H                            | -3.44595900 | -3.63191700 | -0.17134900 |
| C                            | -0.89359400 | -1.58561400 | -4.56080200 | C                            | -4.83602600 | -1.27954800 | -1.07451300 |
| H                            | 0.14072400  | -1.25323000 | -4.74954300 | H                            | -4.97817100 | -0.18647900 | -1.07288600 |
| H                            | -1.00439000 | -2.58427600 | -5.01484800 | H                            | -5.39811500 | -1.68073100 | -1.93290100 |
| H                            | -1.55824100 | -0.90934400 | -5.12126300 | H                            | -5.32334600 | -1.67322400 | -0.16884600 |
| C                            | -2.70533300 | 1.37318200  | -3.63324500 | C                            | -3.49400500 | -1.90392700 | 2.25752300  |
| H                            | -3.29519800 | 1.36665700  | -2.70223700 | H                            | -2.52004600 | -2.35114300 | 2.51242800  |
| H                            | -2.97776600 | 2.28538600  | -4.18839500 | H                            | -4.05861200 | -1.79075000 | 3.19648400  |
| H                            | -3.04256200 | 0.51796000  | -4.23577500 | H                            | -4.03582200 | -2.63539800 | 1.64097200  |
| C                            | -0.74612300 | 2.63655100  | -2.71257900 | C                            | -2.73092700 | 0.47695300  | 2.49746000  |
| H                            | 0.32711500  | 2.61382200  | -2.46996300 | H                            | -2.52750800 | 1.42735600  | 1.98019200  |
| H                            | -0.92847600 | 3.49882400  | -3.37426600 | H                            | -3.42617700 | 0.68649500  | 3.32624100  |
| H                            | -1.29029900 | 2.82383000  | -1.77179400 | H                            | -1.78716700 | 0.13657200  | 2.94523700  |
| C                            | -2.89423600 | 0.19509600  | 0.00000000  | C                            | 0.35261300  | -0.70881600 | 1.70715000  |
| O                            | -4.07895700 | 0.22156600  | 0.00000000  | O                            | 0.67242000  | -0.19906100 | 2.73277600  |
| H                            | -1.18990900 | -1.45798400 | 0.00000000  | C                            | -0.33815200 | -2.94696000 | 0.51275900  |
| C                            | 5.06619700  | 0.06479900  | 0.00000000  | O                            | -0.48445000 | -4.06982300 | 0.80841900  |
| H                            | 5.48662000  | -0.41648300 | -0.89260000 | H                            | -0.68857000 | -1.47108400 | -1.43072400 |
| H                            | 5.41476300  | 1.10964300  | 0.00000000  | C                            | -0.10405400 | 4.95754200  | -0.50537000 |
| H                            | 5.48662000  | -0.41648300 | 0.89260000  | H                            | -0.33834200 | 5.33111800  | -1.51316500 |
| K                            | 3.02957000  | -0.17898500 | 3.83411200  | H                            | -0.90052300 | 5.32286200  | 0.16005100  |
| K                            | 3.02957000  | -0.17898500 | -3.83411200 | H                            | 0.85178200  | 5.39267700  | -0.19389700 |
|                              |             |             |             | K                            | 2.32916200  | 1.91717400  | 2.26348700  |
|                              |             |             |             | K                            | -3.73014900 | 2.83633700  | -1.42459700 |
| <b>MnH-1<sub>1k</sub>-1a</b> |             |             |             | <b>TS1-1a<sub>2</sub>-H'</b> |             |             |             |
| Mn                           | 1.56269213  |             | -0.98225018 | Mn                           | 1.56551059  |             | -0.34817518 |

|             |             |   |             |             |             |   |             |
|-------------|-------------|---|-------------|-------------|-------------|---|-------------|
| -0.04623242 |             | C | 0.54662726  | -0.43506704 |             | C | -0.87541169 |
| 1.55749672  | 1.20126410  |   | C           | -2.06461757 | -0.06882454 |   | C           |
| -0.93121557 |             |   | -0.25367232 | -1.38749527 |             |   | 0.16185280  |
| 1.45951059  |             | N | 0.28889585  | -0.63387828 |             | N | -0.45524443 |
| 0.21995731  | 1.06573241  |   | N           | -0.83368105 | -0.50505293 |   | N           |
| -0.32636333 |             |   | 2.38267771  | -2.21289084 |             |   | -2.33540651 |
| 1.88001023  |             | N | -1.80099689 | 0.11685324  |             | N | -2.73104728 |
| 0.54249249  | 2.17135849  |   | C           | -0.10417319 | -0.51579293 |   | C           |
| -1.42299544 |             |   | 1.80493913  | -3.05242839 |             |   | -1.34349438 |
| 2.35500418  |             | N | -1.33895827 | -0.15686231 |             | N | -1.03526155 |
| -1.47751978 | 1.13968239  |   | N           | 1.42803319  | -0.82343658 |   | N           |
| 1.61400235  |             |   | 2.11602359  | -0.01354873 |             |   | -3.01921707 |
| 0.64389468  |             | P | -0.19684982 | 0.25576834  |             | P | 0.65388809  |
| -2.34215346 | 0.19736853  |   | P           | 1.67662862  | -0.83763762 |   | P           |
| 2.65598006  |             |   | 0.97807909  | 1.61778562  |             |   | -2.55924547 |
| -0.10362531 |             | C | 3.01749356  | 0.06083777  |             | C | 2.34152132  |
| 1.84598538  | -1.73500088 |   | H           | -3.21268561 | 1.67435758  |   | H           |
| 2.00585263  |             |   | 2.20079367  | 1.56901069  |             |   | -2.89081184 |
| -2.00610233 |             | C | 4.23642474  | 2.39854937  |             | C | 2.21731842  |
| 1.24429681  | 0.85836386  |   | H           | -3.80710777 | -1.19063609 |   | H           |
| 4.52522637  |             |   | 2.29628353  | 2.03790132  |             |   | -4.79206034 |
| 0.68731948  |             | C | 3.46408964  | -0.72522655 |             | C | 3.64190837  |
| 0.89179371  | -2.83004658 |   | H           | -2.53150411 | 2.06916330  |   | H           |
| 3.62462560  |             |   | 1.42822561  | 4.01815450  |             |   | -2.92406384 |
| -3.77894216 |             | H | 4.40717399  | 3.02719944  |             | H | 4.43612335  |
| 0.38128099  | -2.58349357 |   | H           | -2.68220559 | 1.32314504  |   | H           |
| 2.71722721  |             |   | 0.10587448  | 3.52192897  |             |   | -1.44484288 |
| -3.00379343 |             | C | 3.91264102  | 2.17369937  |             | C | 2.42958886  |
| 3.07047000  | -1.63320747 |   | H           | -4.72800673 | 1.76695587  |   | H           |
| 4.96114546  |             |   | 2.79802641  | 3.23270513  |             |   | -5.13271207 |
| -1.43881368 |             | H | 3.90866455  | 1.13288271  |             | H | 2.65624378  |
| 3.64052471  | -2.57676260 |   | H           | -5.04560173 | 2.79788351  |   | H           |
| 3.60113920  |             |   | 3.75294762  | 1.49359683  |             |   | -5.22003616 |
| -0.82655141 |             | C | 5.34074899  | 1.45980654  |             | C | 3.70244833  |
| 0.33055020  | 0.35077215  |   | H           | -3.65051049 | -1.47587121 |   | H           |
| 5.06296740  |             |   | -0.72883100 | 3.93204394  |             |   | -2.65466701 |
| 0.46119945  |             | H | 5.57592846  | -1.88310331 |             | H | 4.32329104  |
| 0.49872889  | -0.71107552 |   | H           | -3.79146798 | -0.57851216 |   | H           |
| 6.27293425  |             |   | 0.48354772  | 4.03937978  |             |   | -4.38923976 |
| 0.91683737  |             | C | 3.99426944  | -2.21959441 |             | C | 1.37231729  |
| 1.07922787  | 2.34995662  |   | H           | -3.75074087 | -2.45350086 |   | H           |
| 4.91164488  |             |   | 1.31110130  | 1.66088096  |             |   | -4.56247743 |
| 2.91359070  |             | H | 3.20235761  | -3.13919924 |             | H | 0.30419002  |
| 1.75318916  | 2.70469083  |   | H           | -3.86959520 | -2.22543546 |   | H           |
| 3.70784140  |             |   | 0.05162444  | 1.50188724  |             |   | -2.80713591 |
| 2.61065193  |             | C | -1.26014115 | -2.99931844 |             | C | 0.77386726  |
| -2.73450561 | -1.29615081 |   | H           | 3.03494149  | 0.44826846  |   | H           |
| -1.65030409 |             |   | -1.71932849 | 0.16450507  |             |   | 2.56968763  |
| -1.47578443 |             | C | -0.09449591 | 1.24269590  |             | C | 0.89331880  |
| -3.97294463 | 1.09842222  |   | H           | 2.58152413  | -2.45060625 |   | H           |
| -1.09021197 |             |   | -4.44323992 | 0.30035476  |             |   | 3.50923257  |
| 1.00020721  |             | C | -0.48894963 | -2.35510092 |             | C | 2.16447701  |
| -3.14346383 | -2.53797503 |   | H           | 3.25135964  | 1.01691470  |   | H           |
| -1.15663167 |             |   | -3.18890164 | 2.13499980  |             |   | 3.95816056  |
| -3.41527488 |             | H | 0.31598904  | 1.86281771  |             | H | 2.60875578  |
| -2.43047212 | -2.76156165 |   | H           | 2.31481543  | 1.37714441  |   | H           |
| -0.02474722 |             |   | -4.13681678 | 2.86296831  |             |   | 3.66947876  |

|             |             |   |             |             |             |   |             |
|-------------|-------------|---|-------------|-------------|-------------|---|-------------|
| -2.44176707 |             | C | -2.44417010 | 0.27650138  |             | C | 0.10852543  |
| -3.64834574 | -1.02934675 |   | H           | 4.34478607  | 0.05725029  |   | H           |
| -2.96396534 |             |   | -3.39740889 | -0.86710759 |             |   | 4.19226380  |
| -0.08997775 |             | H | -3.18414365 | -0.43206560 |             | H | -0.05128572 |
| -3.59273298 | -1.84662078 |   | H           | 4.98720398  | 0.93994887  |   | H           |
| -2.14310537 |             |   | -4.70507231 | 0.72594282  |             |   | 4.92701213  |
| -0.95297843 |             | C | 0.94692683  | -0.64433123 |             | C | 2.35294032  |
| -4.87187525 | 0.44889232  |   | H           | 2.94627048  | -2.67201467 |   | H           |
| 1.95120733  |             |   | -4.42716364 | 2.98826651  |             |   | 2.04919129  |
| 0.52114068  |             | H | 0.98726515  | -2.71844249 |             | H | 2.48405981  |
| -5.85494752 | 0.94339392  |   | H           | 3.48570979  | -3.62286030 |   | H           |
| 0.74830811  |             |   | -5.05099382 | 2.75307895  |             |   | 3.59198330  |
| -0.61825239 |             | C | 0.17653661  | -1.87650708 |             | C | 0.31176410  |
| -3.77013391 | 2.58029126  |   | H           | 1.79044260  | -3.61156029 |   | H           |
| -0.57866808 |             |   | -3.12100067 | -0.74280132 |             |   | 1.53764816  |
| 3.04414733  |             | H | 0.16721513  | -3.43596668 |             | H | 0.36858771  |
| -4.73651891 | 3.10879964  |   | H           | 2.37833803  | -4.54097144 |   | H           |
| 1.16104360  |             |   | -3.31612787 | 0.85892812  |             |   | 0.85523548  |
| 2.75648042  |             | C | 2.55587644  | -3.78866828 |             | C | 2.17960945  |
| -1.74271932 | 1.22080262  |   | O           | -0.54533237 | -2.08025657 |   | O           |
| 3.26971571  |             |   | -2.30614675 | 2.68815360  |             |   | -0.63721793 |
| 1.96522049  |             | C | 2.42868997  | -3.13538829 |             | C | 3.17688008  |
| -1.87775621 | -1.30141786 |   | O           | 0.13706800  | 0.09834775  |   | O           |
| 2.96941564  |             |   | -2.46674098 | 4.23277020  |             |   | 0.46630266  |
| -2.15787367 |             | H | 0.76534553  | 0.48790608  |             | H | 1.11657071  |
| -0.38983289 | -1.38621757 |   | C           | -0.00286711 | 1.22217951  |   | C           |
| -5.54538266 |             |   | 1.08053297  | -3.84305913 |             |   | 2.18712829  |
| -0.51713256 |             | C | -4.81536853 | 3.52554042  |             | C | -2.50783631 |
| 0.41988794  | -1.49193844 |   | C           | 2.54418915  | 3.68340846  |   | C           |
| -3.46703930 |             |   | 0.77039190  | -1.46975969 |             |   | 1.62151112  |
| -1.75191415 |             | C | -2.85647370 | 3.44315219  |             | C | -1.78443863 |
| 1.81849465  | -0.98625141 |   | C           | 0.28813925  | 3.00710812  |   | C           |
| -3.62635693 |             |   | 2.46495907  | -3.15778960 |             |   | -0.04377009 |
| 0.01045211  |             | C | -4.94306934 | 2.85972645  |             | C | -4.16065271 |
| 2.10681030  | 0.24079848  |   | H           | 0.87737746  | 3.11739375  |   | H           |
| -3.11739469 |             |   | -0.65831921 | 0.18612807  |             |   | 2.90463321  |
| -3.35802941 |             | H | -6.59420901 | 4.07167443  |             | H | -4.63742673 |
| 0.82162101  | -0.34766400 |   | H           | 2.90393892  | 3.74841718  |   | H           |
| -5.27763077 |             |   | -0.36762776 | -2.24291131 |             |   | 3.54831270  |
| -2.09515258 |             | C | -2.68001850 | 4.03046992  |             | C | -0.08917455 |
| 0.13961198  | -2.75088993 |   | H           | 1.92344742  | 3.67352500  |   | H           |
| -3.14858042 |             |   | 3.25445714  | -3.41104673 |             |   | -1.05550672 |
| 0.59573641  |             | H | -5.52226910 | 2.53102655  |             | H | -5.20743141 |
| 2.62999945  | 1.00619384  |   | C           | 0.57978914  | 3.00688141  |   | C           |
| -0.86088778 |             |   | 1.55604116  | 0.45393786  |             |   | -0.27998587 |
| -2.09861958 |             | C | -1.36817345 | 2.84045267  |             | C | 0.85448909  |
| 0.51509494  | -2.90563638 |   | H           | 0.98905683  | 3.38249879  |   | H           |
| 0.18177268  |             |   | 1.86313829  | 1.19090586  |             |   | -1.08457995 |
| -2.23571125 |             | H | -0.70788110 | 2.87206728  |             | H | 1.92026486  |
| 0.02443341  | -3.62254405 |   | N           | 1.18801574  | 3.51889849  |   | N           |
| -1.56716848 |             |   | 2.21588952  | -0.83561096 |             |   | -0.66203522 |
| -1.19738034 |             | C | -2.31942680 | 2.79259126  |             | C | -4.51656343 |
| 2.65412152  | 3.20695373  |   | H           | -1.65016356 | -0.05377269 |   | H           |
| -3.37302501 |             |   | 2.35704732  | -5.08925036 |             |   | -0.78032065 |
| 3.11205207  |             | H | -2.04721195 | 0.29618719  |             | H | -4.91363690 |
| 2.53593648  | 4.26675449  |   | H           | -1.91446196 | -1.04530947 |   | H           |
| -2.21420430 |             |   | 3.72099286  | -4.70443201 |             |   | -2.50705308 |

|                             |             |             |            |                             |             |             |             |
|-----------------------------|-------------|-------------|------------|-----------------------------|-------------|-------------|-------------|
| 2.96981902                  |             | K           | 0.14601787 | 0.60564659                  |             | K           | -1.41595241 |
| 4.17833026                  | -0.01807761 |             | K          | -3.40860591                 | 2.44203426  |             | K           |
| -3.86879138                 | -0.93083831 | 1.46769290  |            | -3.15366920                 | 2.35891263  | 0.40207651  |             |
| <b>TS1-1a<sub>3</sub>-H</b> |             |             |            | <b>TS1-1a<sub>4</sub>-H</b> |             |             |             |
| Mn -1.37634900              | 0.98191200  | -0.19156700 |            | Mn -0.56829100              | -1.30040500 | -0.19521600 |             |
| C -0.51621000               | -1.56049700 | 1.17893900  |            | C -1.65950100               | 1.46836600  | -0.60720600 |             |
| C 1.00956400                | 0.20989800  | 1.47003900  |            | C 0.54114400                | 1.22341400  | -1.39920900 |             |
| N -0.21970700               | -0.22853900 | 1.04816400  |            | N -0.60560600               | 0.65485500  | -0.89944300 |             |
| N 0.32626700                | -2.41071200 | 1.85799300  |            | N -1.66940800               | 2.79089300  | -1.00087100 |             |
| N 1.86213200                | -0.62409200 | 2.15365100  |            | N 0.57893100                | 2.56005000  | -1.73446700 |             |
| C 1.45483500                | -1.87892500 | 2.31310900  |            | C -0.53980700               | 3.24506500  | -1.54340800 |             |
| N 1.44909100                | 1.42978900  | 1.18937200  |            | N 1.64695400                | 0.51831500  | -1.56300300 |             |
| N -1.59631500               | -2.09108400 | 0.61468800  |            | N -2.71726100               | 1.02619200  | 0.06896700  |             |
| P 0.37264000                | 2.34988300  | 0.23468900  |            | P 1.45352100                | -1.14830600 | -1.21340200 |             |
| P -2.62127100               | -0.91838900 | -0.09929000 |            | P -2.54906500               | -0.59178300 | 0.60393800  |             |
| C -3.23129600               | -1.83029300 | -1.62171600 |            | C -2.81278100               | -0.36076400 | 2.45285600  |             |
| H -2.27810500               | -2.12382100 | -2.09585800 |            | H -2.13024600               | 0.48747100  | 2.63847800  |             |
| C -4.08757200               | -1.03110200 | 1.06103300  |            | C -4.16996500               | -1.33531800 | 0.04167700  |             |
| H -4.36374100               | -2.10094900 | 1.04521300  |            | H -4.95651300               | -0.78139800 | 0.58700100  |             |
| C -3.96028200               | -0.94508600 | -2.62121000 |            | C -2.33527800               | -1.53240100 | 3.29518800  |             |
| H -4.19563800               | -1.51125600 | -3.53604700 |            | H -2.39945000               | -1.29267500 | 4.36854300  |             |
| H -4.91507700               | -0.56769100 | -2.22870800 |            | H -2.93500900               | -2.44057600 | 3.13418900  |             |
| H -3.36752800               | -0.06990500 | -2.91524400 |            | H -1.29513900               | -1.80470900 | 3.07318000  |             |
| C -4.00430200               | -3.10342700 | -1.31430000 |            | C -4.20895300               | 0.08888200  | 2.85013100  |             |
| H -5.01840000               | -2.88530600 | -0.94620400 |            | H -4.94259600               | -0.72922100 | 2.78023600  |             |
| H -4.12608000               | -3.72064000 | -2.21909200 |            | H -4.22844600               | 0.44045200  | 3.89414600  |             |
| H -3.50737400               | -3.71770300 | -0.54698700 |            | H -4.57436100               | 0.91577500  | 2.21987900  |             |
| C -5.27818800               | -0.20060600 | 0.60919400  |            | C -4.25980300               | -2.80823300 | 0.40903600  |             |
| H -5.00922500               | 0.85615500  | 0.46618000  |            | H -3.45602700               | -3.38729400 | -0.06984900 |             |
| H -5.71686000               | -0.56471200 | -0.33038100 |            | H -4.18673000               | -2.97872500 | 1.49273900  |             |
| H -6.07803500               | -0.22742600 | 1.36548600  |            | H -5.21605900               | -3.24123000 | 0.07659100  |             |
| C -3.66695200               | -0.70072200 | 2.48515400  |            | C -4.40099000               | -1.10854400 | -1.44435400 |             |
| H -4.50024300               | -0.89242700 | 3.17891100  |            | H -5.40952100               | -1.44575400 | -1.73177900 |             |
| H -2.81729900               | -1.31627300 | 2.81103900  |            | H -4.30898300               | -0.04623500 | -1.71436000 |             |
| H -3.38812700               | 0.35492900  | 2.60108700  |            | H -3.68652300               | -1.66695100 | -2.06268400 |             |
| C 1.53352300                | 2.87563200  | -1.14100100 |            | C 3.06051000                | -1.50860200 | -0.33488200 |             |
| H 2.02329300                | 1.90708300  | -1.34335300 |            | H 3.03446700                | -0.73307900 | 0.44860500  |             |
| C 0.19157200                | 3.89956600  | 1.25671900  |            | C 1.72147100                | -1.86458100 | -2.92215900 |             |
| H 1.21437900                | 4.30837300  | 1.34206600  |            | H 2.72252100                | -1.50357900 | -3.22096600 |             |
| C 0.83517300                | 3.30063100  | -2.42133500 |            | C 3.10304900                | -2.85752000 | 0.36481100  |             |
| H 1.57175900                | 3.53113400  | -3.20834600 |            | H 4.02303600                | -2.94640500 | 0.96419600  |             |
| H 0.17227800                | 2.51433800  | -2.80480600 |            | H 2.25332600                | -3.00049300 | 1.04420200  |             |
| H 0.21431200                | 4.19970800  | -2.29034900 |            | H 3.10008600                | -3.70034500 | -0.34231100 |             |
| C 2.61473200                | 3.86046500  | -0.72514400 |            | C 4.30266400                | -1.27129900 | -1.17918600 |             |
| H 3.09292600                | 3.58555300  | 0.22882400  |            | H 4.25219000                | -0.32585100 | -1.74256500 |             |
| H 3.40583700                | 3.92323100  | -1.49085900 |            | H 5.20300000                | -1.23673600 | -0.54452400 |             |
| H 2.21948000                | 4.88051600  | -0.59996500 |            | H 4.46333800                | -2.07539500 | -1.91444400 |             |
| C -0.69381400               | 4.92267900  | 0.56271500  |            | C 1.71801200                | -3.38502300 | -2.92785800 |             |
| H -1.70971600               | 4.53262400  | 0.40090600  |            | H 0.77590800                | -3.78974100 | -2.52953400 |             |
| H -0.79059400               | 5.83613800  | 1.16980400  |            | H 1.82528100                | -3.77102200 | -3.95373200 |             |
| H -0.29790400               | 5.22709100  | -0.41754300 |            | H 2.54037500                | -3.81261500 | -2.33738600 |             |
| C -0.28142700               | 3.57821900  | 2.66542400  |            | C 0.72047600                | -1.28918700 | -3.91229000 |             |
| H 0.36598500                | 2.83061800  | 3.14415800  |            | H 0.74046800                | -0.19049100 | -3.91717300 |             |
| H -0.26662500               | 4.48585900  | 3.28883500  |            | H 0.95437300                | -1.63158200 | -4.93265000 |             |
| H -1.30996500               | 3.19537100  | 2.68027700  |            | H -0.30683000               | -1.61006700 | -3.69330400 |             |
| C -2.49360300               | 1.89994600  | 0.82400000  |            | C -1.28204700               | -2.30521300 | -1.46145900 |             |
| O -3.27771500               | 2.56548900  | 1.39268000  |            | O -1.73716400               | -3.06575900 | -2.23549500 |             |



|                              |             |             |             |                              |             |             |             |
|------------------------------|-------------|-------------|-------------|------------------------------|-------------|-------------|-------------|
| C                            | -2.02955700 | 1.75097500  | -1.63677300 | C                            | -0.32685700 | -2.71019500 | 0.83809700  |
| O                            | -2.41645300 | 2.23012200  | -2.63504000 | O                            | -0.16114300 | -3.61218000 | 1.56954400  |
| H                            | -0.27082000 | 0.31228500  | -1.40046300 | H                            | 0.20151500  | -0.47357100 | 1.13274200  |
| C                            | 5.29132800  | -0.83152800 | -1.16826900 | C                            | 3.95491400  | -0.86733100 | 3.15361000  |
| C                            | 4.29780200  | -0.21870800 | -1.91224600 | C                            | 2.58607100  | -0.67589100 | 3.08969900  |
| C                            | 2.95906900  | -0.70972200 | -1.90514700 | C                            | 2.03932700  | 0.47096900  | 2.48320000  |
| C                            | 2.68329000  | -1.88455900 | -1.11957500 | C                            | 2.91165400  | 1.46004000  | 1.93209800  |
| C                            | 3.70690600  | -2.46708600 | -0.35081300 | C                            | 4.30861500  | 1.23131600  | 2.00036700  |
| C                            | 4.99825700  | -1.95243500 | -0.35996400 | C                            | 4.81926200  | 0.09245800  | 2.59597800  |
| H                            | 6.31588900  | -0.44916300 | -1.21366600 | H                            | -0.03087300 | 0.05297800  | 2.97951000  |
| H                            | 4.53064300  | 0.65053400  | -2.53606600 | H                            | 4.36316900  | -1.76659900 | 3.62013000  |
| C                            | 1.91293500  | -0.13615700 | -2.64896700 | H                            | 1.90151100  | -1.43461300 | 3.48324400  |
| H                            | 3.46047200  | -3.35340800 | 0.24091600  | C                            | 0.61670800  | 0.65542100  | 2.33945200  |
| H                            | 5.78836000  | -2.43557600 | 0.22012300  | H                            | 4.97672400  | 1.99806600  | 1.59412000  |
| C                            | 0.50391000  | -1.89400700 | -1.85049300 | H                            | 5.90098700  | -0.05885100 | 2.64220000  |
| C                            | 0.59362000  | -0.59803400 | -2.46871800 | C                            | 1.14060300  | 2.82053200  | 1.40437800  |
| H                            | -0.45920800 | -2.41805100 | -1.91453200 | C                            | 0.19841800  | 1.93097200  | 1.91459700  |
| H                            | -0.17239700 | -0.33739700 | -3.20354600 | H                            | -0.85942200 | 2.20334600  | 1.91127200  |
| N                            | 1.45084700  | -2.49273300 | -1.18051500 | N                            | 2.45669000  | 2.61722700  | 1.35898700  |
| C                            | 2.35714000  | -2.77779800 | 3.10409200  | C                            | -0.50729100 | 4.69561000  | -1.92240200 |
| H                            | 3.41466100  | -2.52615600 | 2.94666300  | H                            | -1.51512400 | 5.09079100  | -2.10129700 |
| H                            | 2.15680500  | -2.65890000 | 4.17948600  | H                            | -0.05878100 | 5.29211400  | -1.11215300 |
| H                            | 2.19258000  | -3.83513700 | 2.86011000  | H                            | 0.10576400  | 4.85652300  | -2.81781100 |
| K                            | -0.23871400 | -4.32193000 | 0.13510700  | K                            | -4.16227700 | 3.14365300  | -0.20102700 |
| K                            | 3.96930700  | 0.68721000  | 1.21763500  | K                            | 3.26354400  | 2.57208300  | -1.25573600 |
| H                            | 2.12066100  | 0.71260800  | -3.30505400 | H                            | 0.79155500  | 3.78390600  | 1.00601200  |
| <b>TS2-2a<sub>2</sub>-H'</b> |             |             |             | <b>TS2-2a<sub>3</sub>-H'</b> |             |             |             |
| Mn                           | 1.43549400  | 0.93959200  | 0.08929500  | Mn                           | -1.11632300 | 1.20563300  | -0.14104500 |
| C                            | 0.61829000  | -1.56855300 | -1.34562200 | C                            | -0.93809000 | -1.63925400 | 0.83190400  |
| C                            | -0.90947500 | 0.19764000  | -1.62877200 | C                            | 0.94003900  | -0.34496600 | 1.40692300  |
| N                            | 0.31054300  | -0.24145600 | -1.19843500 | N                            | -0.32603100 | -0.42384200 | 0.88460400  |
| N                            | -0.23499700 | -2.42569100 | -2.00643500 | N                            | -0.37748900 | -2.74791800 | 1.43230900  |
| N                            | -1.72562000 | -0.61304800 | -2.38398600 | N                            | 1.55229500  | -1.45584400 | 1.94953600  |
| C                            | -1.32792300 | -1.87418600 | -2.52219600 | C                            | 0.84383100  | -2.57327900 | 1.95012600  |
| N                            | -1.37956100 | 1.39613500  | -1.29512900 | N                            | 1.63039100  | 0.78131900  | 1.38340500  |
| N                            | 1.70904400  | -2.09344100 | -0.80337700 | N                            | -2.09842100 | -1.80757200 | 0.19692100  |
| P                            | -0.34927300 | 2.26080800  | -0.24173500 | P                            | 0.81444500  | 2.08368100  | 0.62899400  |
| P                            | 2.66519400  | -0.95328400 | 0.03553000  | P                            | -2.69433300 | -0.36600600 | -0.52060200 |
| C                            | 3.05174000  | -1.92576600 | 1.60301500  | C                            | -3.15014300 | -0.96537800 | -2.24766400 |
| H                            | 2.06811700  | -2.38917500 | 1.80755400  | H                            | -2.23600700 | -1.51157500 | -2.53461500 |
| C                            | 4.27512700  | -1.03990100 | -0.90516100 | C                            | -4.37438900 | -0.26660800 | 0.30936900  |
| H                            | 4.61143100  | -2.08812800 | -0.82270500 | H                            | -4.88726900 | -1.20506700 | 0.02569000  |
| C                            | 3.38701100  | -1.03578800 | 2.78847000  | C                            | -3.32501400 | 0.17232100  | -3.24214600 |
| H                            | 3.57718900  | -1.63586700 | 3.69279300  | H                            | -3.52172000 | -0.22108100 | -4.25189500 |
| H                            | 4.28364200  | -0.42323000 | 2.61143200  | H                            | -4.16499600 | 0.83533200  | -2.98698400 |
| H                            | 2.57348000  | -0.33211900 | 3.01187600  | H                            | -2.43279900 | 0.80818300  | -3.29898400 |
| C                            | 4.04769600  | -3.06149000 | 1.42929600  | C                            | -4.29940400 | -1.95813200 | -2.30791000 |
| H                            | 5.07343400  | -2.69095800 | 1.28248300  | H                            | -5.27387200 | -1.47929100 | -2.12541000 |
| H                            | 4.07252000  | -3.70219800 | 2.32599200  | H                            | -4.36110300 | -2.42544300 | -3.30373000 |
| H                            | 3.80582000  | -3.70022100 | 0.56571000  | H                            | -4.18498700 | -2.77236800 | -1.57438900 |
| C                            | 5.32380600  | -0.12654900 | -0.29039400 | C                            | -5.19513900 | 0.91036800  | -0.19286200 |
| H                            | 5.00116500  | 0.92523000  | -0.31069700 | H                            | -4.67649300 | 1.86448300  | -0.01738200 |
| H                            | 5.54622000  | -0.38156500 | 0.75685600  | H                            | -5.41160600 | 0.84390600  | -1.26846300 |
| H                            | 6.27300800  | -0.18536800 | -0.84549200 | H                            | -6.16372000 | 0.96787500  | 0.32806600  |
| C                            | 4.05201400  | -0.75681000 | -2.38218600 | C                            | -4.25255000 | -0.26233500 | 1.82593200  |
| H                            | 4.98828000  | -0.90273600 | -2.94320800 | H                            | -5.24617200 | -0.36475800 | 2.29091600  |
| H                            | 3.29753100  | -1.43206500 | -2.80871100 | H                            | -3.62187900 | -1.08744900 | 2.19186400  |

|                                         |             |             |             |                                          |             |             |             |
|-----------------------------------------|-------------|-------------|-------------|------------------------------------------|-------------|-------------|-------------|
| H                                       | 3.72633600  | 0.27602400  | -2.56268900 | H                                        | -3.81606600 | 0.67034900  | 2.20425900  |
| C                                       | -1.54504800 | 2.57961300  | 1.16961400  | C                                        | 2.14449400  | 2.67036500  | -0.54804500 |
| H                                       | -1.79754800 | 1.52990900  | 1.40212700  | H                                        | 2.47574900  | 1.69925400  | -0.95367500 |
| C                                       | -0.21408500 | 3.93426400  | -1.05709500 | C                                        | 0.84806600  | 3.36400500  | 1.98717000  |
| H                                       | -1.21077600 | 4.40364300  | -0.95804000 | H                                        | 1.91940800  | 3.53395900  | 2.19589500  |
| C                                       | -0.92332700 | 3.20845400  | 2.40532200  | C                                        | 1.61400600  | 3.47932600  | -1.71949800 |
| H                                       | -1.58949700 | 3.10906800  | 3.27915300  | H                                        | 2.43169300  | 3.74388600  | -2.40945400 |
| H                                       | 0.04629100  | 2.76336000  | 2.66729300  | H                                        | 0.86484900  | 2.91693800  | -2.29176700 |
| H                                       | -0.75377400 | 4.28738700  | 2.26988900  | H                                        | 1.13633300  | 4.42108300  | -1.40875200 |
| C                                       | -2.82713000 | 3.29794400  | 0.77764800  | C                                        | 3.34483300  | 3.33028500  | 0.11153900  |
| H                                       | -3.20227800 | 2.98030400  | -0.20725900 | H                                        | 3.70890400  | 2.76920300  | 0.98745500  |
| H                                       | -3.62653800 | 3.13010800  | 1.51986300  | H                                        | 4.18312100  | 3.41620500  | -0.59943900 |
| H                                       | -2.68188400 | 4.38755800  | 0.71719000  | H                                        | 3.12129800  | 4.35125500  | 0.45864000  |
| C                                       | 0.81544100  | 4.80189600  | -0.34600100 | C                                        | 0.22001000  | 4.67113500  | 1.52960000  |
| H                                       | 1.83011100  | 4.40159700  | -0.48279800 | H                                        | -0.83815300 | 4.53664100  | 1.26034700  |
| H                                       | 0.81212200  | 5.82628500  | -0.74973000 | H                                        | 0.25756800  | 5.42807300  | 2.32856700  |
| H                                       | 0.64323600  | 4.87563200  | 0.73736900  | H                                        | 0.73093400  | 5.09941000  | 0.65449600  |
| C                                       | 0.09123400  | 3.79838800  | -2.54025200 | C                                        | 0.22119900  | 2.83198200  | 3.26585900  |
| H                                       | -0.67382700 | 3.20518300  | -3.05850900 | H                                        | 0.69228100  | 1.89028400  | 3.58045300  |
| H                                       | 0.13841800  | 4.79044000  | -3.01616100 | H                                        | 0.34501600  | 3.55949700  | 4.08350300  |
| H                                       | 1.06249600  | 3.31309300  | -2.71088900 | H                                        | -0.85624700 | 2.65285000  | 3.15564700  |
| C                                       | 2.47862600  | 1.85626900  | -1.00946700 | C                                        | -2.11610800 | 2.08699000  | 1.01569400  |
| O                                       | 3.20697600  | 2.50954300  | -1.66053200 | O                                        | -2.79642300 | 2.77192400  | 1.69047600  |
| C                                       | 2.13544400  | 1.75869300  | 1.48711900  | C                                        | -1.52718300 | 2.37417300  | -1.40048600 |
| O                                       | 2.56344000  | 2.29464400  | 2.43955500  | O                                        | -1.78275600 | 3.12686500  | -2.26176200 |
| H                                       | 0.47964300  | 0.09333500  | 1.23875700  | H                                        | 0.00364900  | 0.59077500  | -1.37518300 |
| C                                       | -5.27119300 | -1.15481100 | 0.63244200  | C                                        | 5.51847100  | -1.24954500 | -1.33866300 |
| C                                       | -4.60457500 | -0.48175800 | 1.66188500  | C                                        | 4.57002400  | -0.42763700 | -1.96107000 |
| C                                       | -3.26272700 | -0.73461100 | 1.95763900  | C                                        | 3.19814200  | -0.74621300 | -1.98265400 |
| C                                       | -2.54042800 | -1.66523800 | 1.16850700  | C                                        | 2.78467800  | -1.93933000 | -1.30229800 |
| C                                       | -3.22204700 | -2.32952100 | 0.12875200  | C                                        | 3.73842400  | -2.75189300 | -0.67217400 |
| C                                       | -4.56942100 | -2.09487700 | -0.12994700 | C                                        | 5.10162600  | -2.42013900 | -0.69830200 |
| H                                       | -3.07151400 | -0.65369200 | 4.05433100  | H                                        | 6.57888700  | -0.98769300 | -1.37874600 |
| H                                       | -6.33464200 | -0.97300900 | 0.45390200  | H                                        | 4.89248300  | 0.48621700  | -2.47087800 |
| H                                       | -5.15326100 | 0.23100400  | 2.28740400  | C                                        | 2.20078200  | 0.05086700  | -2.63629300 |
| C                                       | -2.62246300 | -0.14575500 | 3.18272700  | H                                        | 3.40305800  | -3.66597300 | -0.17139400 |
| H                                       | -2.66395300 | -3.04930500 | -0.47626300 | H                                        | 5.82995400  | -3.08987100 | -0.23317200 |
| H                                       | -5.07361600 | -2.65098000 | -0.92581400 | C                                        | 0.48318200  | -1.65725100 | -2.17599600 |
| C                                       | -0.52166600 | -1.23912000 | 2.22679800  | C                                        | 0.85465500  | -0.25519700 | -2.56412500 |
| C                                       | -1.10111800 | -0.28478800 | 3.23511200  | H                                        | 0.38910500  | -2.27225600 | -3.10092500 |
| H                                       | 0.49619500  | -1.57111500 | 2.44999800  | H                                        | 0.17848500  | 0.22154900  | -3.27829900 |
| H                                       | -0.59311400 | 0.68423400  | 3.13646000  | N                                        | 1.44697400  | -2.22180700 | -1.25821100 |
| N                                       | -1.20301200 | -1.98044200 | 1.39110500  | C                                        | 1.46927700  | -3.77891800 | 2.58690400  |
| C                                       | -2.20711200 | -2.76717500 | -3.34598100 | H                                        | 0.95440700  | -4.03013200 | 3.52660900  |
| H                                       | -3.26397300 | -2.47639800 | -3.27329400 | H                                        | 1.38719100  | -4.66148900 | 1.93590400  |
| H                                       | -1.92688900 | -2.69329100 | -4.40745700 | H                                        | 2.52571300  | -3.60438000 | 2.82081700  |
| H                                       | -2.09297200 | -3.82055900 | -3.05948700 | K                                        | -2.67064000 | -4.07822100 | 1.26698900  |
| K                                       | 0.21106100  | -4.05474000 | 0.08364300  | K                                        | 3.98257400  | -0.36096000 | 1.25790000  |
| K                                       | -3.88173400 | 0.66392000  | -1.53517300 | H                                        | 2.52581500  | 0.96539500  | -3.13971500 |
| H                                       | -0.79120400 | -0.65223400 | 4.22758500  | H                                        | -0.49756900 | -1.68257700 | -1.68458100 |
| H                                       | -2.92709100 | 0.90703500  | 3.29693000  | H                                        | 1.16750300  | -3.06781400 | -0.77861900 |
| <b>TS2-2a<sub>g</sub>-H<sup>-</sup></b> |             |             |             | <b>TS2-2a<sub>2</sub>'-H<sup>-</sup></b> |             |             |             |
| Mn                                      | 0.53967200  | -1.34000300 | -0.03282500 | Mn                                       | -1.04083200 | 1.25289000  | -0.17420800 |
| C                                       | 1.58509600  | 1.27811300  | 1.00477000  | C                                        | -1.01634100 | -1.54582400 | 0.91706700  |
| C                                       | -0.62417500 | 0.83618500  | 1.67043000  | C                                        | 0.95247000  | -0.35345100 | 1.39760500  |
| N                                       | 0.55335400  | 0.39012000  | 1.12247700  | N                                        | -0.33916100 | -0.36241300 | 0.93578500  |
| N                                       | 1.52476000  | 2.52320500  | 1.59610100  | N                                        | -0.47923600 | -2.68736400 | 1.48336000  |

|   |             |             |             |   |             |             |             |
|---|-------------|-------------|-------------|---|-------------|-------------|-------------|
| N | -0.73184000 | 2.09961600  | 2.20437400  | N | 1.53002400  | -1.49090900 | 1.91679900  |
| C | 0.36485200  | 2.84802200  | 2.16261400  | C | 0.76833800  | -2.57691000 | 1.94171100  |
| N | -1.70974800 | 0.07834800  | 1.68065800  | N | 1.70026800  | 0.73584900  | 1.33294800  |
| N | 2.68832700  | 0.97723500  | 0.32501700  | N | -2.22667200 | -1.64639900 | 0.37344400  |
| P | -1.49712000 | -1.45529600 | 0.95906900  | P | 0.93954700  | 2.05731400  | 0.55561900  |
| P | 2.59159100  | -0.51123100 | -0.50861900 | P | -2.73455300 | -0.22102000 | -0.42702300 |
| C | 3.06054200  | 0.06053800  | -2.24068600 | C | -3.20418800 | -0.93990700 | -2.10249900 |
| H | 2.39211800  | 0.93348400  | -2.34714900 | H | -2.30222700 | -1.53798300 | -2.31894000 |
| C | 4.15079700  | -1.35514800 | 0.08379700  | C | -4.40345700 | 0.04662900  | 0.37948800  |
| H | 4.97068200  | -0.66409400 | -0.18641900 | H | -4.96802400 | -0.88535300 | 0.18674900  |
| C | 2.70955400  | -0.92625500 | -3.34209600 | C | -3.34426700 | 0.09778900  | -3.20413700 |
| H | 2.92842800  | -0.49729700 | -4.33293800 | H | -3.51864600 | -0.38946600 | -4.17669300 |
| H | 3.28029900  | -1.86363200 | -3.26643100 | H | -4.18852600 | 0.78248600  | -3.03462800 |
| H | 1.64866700  | -1.20509800 | -3.32814600 | H | -2.44862000 | 0.72387000  | -3.30105400 |
| C | 4.48916000  | 0.56351900  | -2.37371900 | C | -4.38318900 | -1.89870700 | -2.07590100 |
| H | 5.21994400  | -0.26000700 | -2.37267600 | H | -5.34280800 | -1.37441200 | -1.94565100 |
| H | 4.63110400  | 1.10827500  | -3.32129200 | H | -4.45678300 | -2.45931400 | -3.02173500 |
| H | 4.77185400  | 1.24414000  | -1.55386100 | H | -4.29803200 | -2.63921800 | -1.26390100 |
| C | 4.38107600  | -2.68954700 | -0.60720100 | C | -5.15783900 | 1.21468100  | -0.23496800 |
| H | 3.53955500  | -3.37841200 | -0.44105500 | H | -4.58355200 | 2.14936100  | -0.15245600 |
| H | 4.51491200  | -2.58547600 | -1.69358300 | H | -5.38397000 | 1.05667000  | -1.29912900 |
| H | 5.28457800  | -3.18369800 | -0.21710300 | H | -6.11837100 | 1.37872600  | 0.27823600  |
| C | 4.15334300  | -1.48677100 | 1.59903100  | C | -4.26764800 | 0.18953400  | 1.88789400  |
| H | 5.13574200  | -1.83924800 | 1.95112200  | H | -5.26039000 | 0.18740100  | 2.36590200  |
| H | 3.94370000  | -0.52521300 | 2.08876200  | H | -3.67966300 | -0.63183200 | 2.32460000  |
| H | 3.40676900  | -2.21082100 | 1.94976000  | H | -3.77625600 | 1.12974600  | 2.16937700  |
| C | -3.11485100 | -1.59824000 | 0.02922400  | C | 2.34482200  | 2.57753200  | -0.57898700 |
| H | -3.08824500 | -0.66008700 | -0.55346200 | H | 2.60819200  | 1.59090400  | -0.99692000 |
| C | -1.76899800 | -2.55567100 | 2.44936200  | C | 1.01814700  | 3.34637500  | 1.90858800  |
| H | -2.75071900 | -2.23718700 | 2.84551800  | H | 2.09096400  | 3.42641700  | 2.16047100  |
| C | -3.17067000 | -2.74706400 | -0.96383300 | C | 1.93193100  | 3.47536300  | -1.73298300 |
| H | -4.08575900 | -2.68089900 | -1.57384000 | H | 2.76827400  | 3.61000200  | -2.43858300 |
| H | -2.31561300 | -2.74626200 | -1.65172500 | H | 1.08330700  | 3.06740400  | -2.29681800 |
| H | -3.18795700 | -3.72860800 | -0.46743000 | H | 1.63614200  | 4.48041500  | -1.39642400 |
| C | -4.35200700 | -1.56406200 | 0.91393300  | C | 3.58005700  | 3.10874000  | 0.13147600  |
| H | -4.28617400 | -0.80018200 | 1.70542700  | H | 3.85214900  | 2.50708000  | 1.01357200  |
| H | -5.25428400 | -1.35784200 | 0.31403100  | H | 4.44918200  | 3.12189600  | -0.54766000 |
| H | -4.52356400 | -2.52695300 | 1.42010000  | H | 3.44158200  | 4.14247000  | 0.48457400  |
| C | -1.82878600 | -4.03453500 | 2.10200100  | C | 0.51793800  | 4.70154700  | 1.43500000  |
| H | -0.91689600 | -4.36905300 | 1.58610100  | H | -0.53056800 | 4.65169600  | 1.10627500  |
| H | -1.92240300 | -4.64446000 | 3.01428400  | H | 0.56675500  | 5.44452200  | 2.24655900  |
| H | -2.68622600 | -4.28469100 | 1.46164000  | H | 1.10961000  | 5.10008600  | 0.59779800  |
| C | -0.73434800 | -2.26385800 | 3.52534900  | C | 0.29966700  | 2.87023100  | 3.16109100  |
| H | -0.69325600 | -1.19293600 | 3.76861900  | H | 0.65813500  | 1.88061800  | 3.47806500  |
| H | -0.98319400 | -2.80655500 | 4.45092100  | H | 0.47431500  | 3.57210300  | 3.99194600  |
| H | 0.27286900  | -2.58303000 | 3.22536500  | H | -0.78659100 | 2.80752700  | 3.01521400  |
| C | 1.17116000  | -2.72423200 | 0.85865700  | C | -1.98736300 | 2.33762500  | 0.84480800  |
| O | 1.57384200  | -3.71138000 | 1.35763700  | O | -2.64450700 | 3.13133500  | 1.41732200  |
| C | 0.25692100  | -2.33205900 | -1.46024700 | C | -1.28882800 | 2.27538100  | -1.59046500 |
| O | 0.05247700  | -2.94809400 | -2.44056000 | O | -1.43291800 | 2.92984700  | -2.55512400 |
| H | -0.07847100 | 0.01726900  | -1.09762200 | H | -0.15657000 | 0.18819800  | -1.34541600 |
| C | -3.61733600 | -0.25710600 | -3.25251200 | C | 5.26419500  | -1.01075900 | -1.49843600 |
| C | -2.25466500 | -0.11233700 | -2.98605900 | C | 4.13351000  | -0.39133100 | -2.05341800 |
| C | -1.76094300 | 0.96430200  | -2.24641700 | C | 2.85794700  | -0.95021000 | -1.98622400 |
| C | -2.66858200 | 1.93023400  | -1.76552000 | C | 2.70472600  | -2.18542400 | -1.28806500 |
| C | -4.04105200 | 1.77319600  | -2.01666300 | C | 3.84116300  | -2.81130300 | -0.72366200 |
| C | -4.51284200 | 0.68697900  | -2.75650500 | C | 5.10549300  | -2.24561500 | -0.85361000 |

|                               |             |             |             |   |             |             |             |
|-------------------------------|-------------|-------------|-------------|---|-------------|-------------|-------------|
| H                             | 0.31541400  | 0.65185300  | -2.74133300 | H | 1.81416100  | -0.49374600 | -3.79244300 |
| H                             | -3.97510400 | -1.10950300 | -3.83356100 | H | 6.25266000  | -0.55979300 | -1.60977100 |
| H                             | -1.54140700 | -0.86124400 | -3.34488200 | H | 4.24996900  | 0.56093200  | -2.58323400 |
| C                             | -0.31240100 | 1.12468300  | -1.97544800 | C | 1.68506400  | -0.32952600 | -2.70530300 |
| H                             | -4.74250900 | 2.53770000  | -1.65903400 | H | 3.71486800  | -3.77402100 | -0.21814000 |
| H                             | -5.58392400 | 0.59222600  | -2.95197400 | H | 5.97432600  | -2.77203600 | -0.44668000 |
| C                             | -0.82227900 | 3.42802000  | -1.00727000 | C | 0.32640700  | -2.16941900 | -1.76012700 |
| C                             | 0.09152500  | 2.38820600  | -1.53680900 | C | 0.33990500  | -0.88560700 | -2.27947800 |
| H                             | -0.73274000 | 4.35723400  | -1.61692000 | H | -0.58556400 | -2.74913400 | -1.62516900 |
| H                             | 1.15083600  | 2.66039800  | -1.57001900 | H | -0.47152500 | -0.65755600 | -2.97643200 |
| N                             | -2.22979000 | 3.00850100  | -0.97867600 | N | 1.47004600  | -2.75016100 | -1.20730500 |
| C                             | 0.29436200  | 4.18604600  | 2.83698500  | C | 1.37143600  | -3.80146700 | 2.56538500  |
| H                             | -0.73416800 | 4.56722100  | 2.86475500  | H | 0.91228900  | -4.72290500 | 2.18251900  |
| H                             | 0.63470100  | 4.10458500  | 3.88090400  | H | 2.45596400  | -3.84097200 | 2.39728700  |
| H                             | 0.93935700  | 4.92507400  | 2.34273500  | H | 1.22396100  | -3.78958800 | 3.65642200  |
| K                             | 3.78181500  | 3.30291500  | 0.48650400  | K | -2.80413200 | -3.96075900 | 1.32281300  |
| K                             | -3.35200700 | 2.05218500  | 1.46996600  | K | 3.98876500  | -0.47749500 | 1.33991100  |
| H                             | -2.84729000 | 3.80688900  | -1.09611300 | H | 1.35376400  | -3.54690400 | -0.59481000 |
| H                             | -0.54953500 | 3.75688400  | 0.02219500  | H | 1.69591600  | 0.76841600  | -2.59226900 |
| <b>TS2-2a<sub>3</sub>'-H'</b> |             |             |             |   |             |             |             |
| Mn                            | 1.18747900  | 1.10767500  | 0.27961000  |   |             |             |             |
| C                             | 0.93840300  | -1.39363800 | -1.36868700 |   |             |             |             |
| C                             | -0.95389600 | -0.00543700 | -1.52744000 |   |             |             |             |
| N                             | 0.35479100  | -0.17391700 | -1.15425500 |   |             |             |             |
| N                             | 0.28254500  | -2.38501300 | -2.06777600 |   |             |             |             |
| N                             | -1.63036300 | -0.98451300 | -2.21540700 |   |             |             |             |
| C                             | -0.95916400 | -2.10710300 | -2.45253500 |   |             |             |             |
| N                             | -1.63061600 | 1.08900200  | -1.20468500 |   |             |             |             |
| N                             | 2.13307700  | -1.69158000 | -0.87507400 |   |             |             |             |
| P                             | -0.71757300 | 2.21114500  | -0.29730100 |   |             |             |             |
| P                             | 2.79189300  | -0.48247800 | 0.13321600  |   |             |             |             |
| C                             | 3.24789100  | -1.53472300 | 1.62043700  |   |             |             |             |
| H                             | 2.27448100  | -2.02884100 | 1.80404900  |   |             |             |             |
| C                             | 4.43102000  | -0.18363700 | -0.70777400 |   |             |             |             |
| H                             | 4.90032600  | -1.18289300 | -0.76455400 |   |             |             |             |
| C                             | 3.60693800  | -0.75636700 | 2.87546300  |   |             |             |             |
| H                             | 3.72063900  | -1.43718300 | 3.73420600  |   |             |             |             |
| H                             | 4.56047600  | -0.21852600 | 2.77158600  |   |             |             |             |
| H                             | 2.84698900  | -0.01193900 | 3.14121700  |   |             |             |             |
| C                             | 4.27968000  | -2.61185500 | 1.31790900  |   |             |             |             |
| H                             | 5.29563600  | -2.19244800 | 1.25598100  |   |             |             |             |
| H                             | 4.30795100  | -3.37538200 | 2.11342500  |   |             |             |             |
| H                             | 4.09447400  | -3.11952700 | 0.35752400  |   |             |             |             |
| C                             | 5.33760500  | 0.75111900  | 0.07664700  |   |             |             |             |
| H                             | 4.85773000  | 1.72428300  | 0.25680300  |   |             |             |             |
| H                             | 5.63015500  | 0.33752700  | 1.05233100  |   |             |             |             |
| H                             | 6.26747300  | 0.94927900  | -0.47876700 |   |             |             |             |
| C                             | 4.20839400  | 0.29253700  | -2.13526400 |   |             |             |             |
| H                             | 5.16548000  | 0.33455000  | -2.67808400 |   |             |             |             |
| H                             | 3.54041000  | -0.38471000 | -2.68532500 |   |             |             |             |
| H                             | 3.77376900  | 1.30073400  | -2.16885000 |   |             |             |             |
| C                             | -2.04698500 | 2.78298700  | 0.89860100  |   |             |             |             |
| H                             | -2.42085700 | 1.79936500  | 1.22695000  |   |             |             |             |
| C                             | -0.62916900 | 3.63778500  | -1.50522700 |   |             |             |             |
| H                             | -1.68286200 | 3.80937200  | -1.79114800 |   |             |             |             |
| C                             | -1.53258700 | 3.52681600  | 2.12029300  |   |             |             |             |
| H                             | -2.34666300 | 3.69971600  | 2.84304300  |   |             |             |             |

|                              |             |             |               |                                           |             |             |               |
|------------------------------|-------------|-------------|---------------|-------------------------------------------|-------------|-------------|---------------|
| H                            | -0.73175000 | 2.98568800  | 2.64110300    |                                           |             |             |               |
| H                            | -1.12556700 | 4.51568700  | 1.86370900    |                                           |             |             |               |
| C                            | -3.21927400 | 3.50021500  | 0.24809200    |                                           |             |             |               |
| H                            | -3.56391100 | 2.99133100  | -0.66578400   |                                           |             |             |               |
| H                            | -4.07442800 | 3.56478100  | 0.94155300    |                                           |             |             |               |
| H                            | -2.96578800 | 4.53329700  | -0.03506400   |                                           |             |             |               |
| C                            | -0.06931000 | 4.90939200  | -0.88859800   |                                           |             |             |               |
| H                            | 0.94492700  | 4.75867300  | -0.49162600   |                                           |             |             |               |
| H                            | -0.00229100 | 5.71021700  | -1.64156100   |                                           |             |             |               |
| H                            | -0.69534500 | 5.29274000  | -0.06999500   |                                           |             |             |               |
| C                            | 0.11595200  | 3.23191800  | -2.76724100   |                                           |             |             |               |
| H                            | -0.28360700 | 2.30045400  | -3.19242700   |                                           |             |             |               |
| H                            | 0.01970700  | 4.01554000  | -3.53501000   |                                           |             |             |               |
| H                            | 1.18951400  | 3.08826300  | -2.58599600   |                                           |             |             |               |
| C                            | 2.22777000  | 2.35295400  | -0.41727900   |                                           |             |             |               |
| O                            | 2.96344100  | 3.20447400  | -0.75937700   |                                           |             |             |               |
| C                            | 1.41577800  | 1.70497200  | 1.91552900    |                                           |             |             |               |
| O                            | 1.48563400  | 2.01902900  | 3.04710700    |                                           |             |             |               |
| H                            | 0.42196200  | -0.20162100 | 1.22879600    |                                           |             |             |               |
| C                            | -5.17434200 | -0.62377000 | 1.54896300    |                                           |             |             |               |
| C                            | -3.93384000 | -0.15876500 | 1.97496000    |                                           |             |             |               |
| C                            | -2.75539000 | -0.91516800 | 1.76879700    |                                           |             |             |               |
| C                            | -2.85826600 | -2.16504600 | 1.10022900    |                                           |             |             |               |
| C                            | -4.11666400 | -2.60317700 | 0.68522000    |                                           |             |             |               |
| C                            | -5.28142500 | -1.85343000 | 0.89021700    |                                           |             |             |               |
| H                            | -6.06745200 | -0.02652400 | 1.75329100    |                                           |             |             |               |
| H                            | -3.86447900 | 0.78489400  | 2.52314000    |                                           |             |             |               |
| H                            | -4.18233100 | -3.57632400 | 0.18596100    |                                           |             |             |               |
| H                            | -6.25418800 | -2.23884200 | 0.57633500    |                                           |             |             |               |
| C                            | -0.44200100 | -2.50301100 | 1.63288700    |                                           |             |             |               |
| C                            | -0.34377800 | -1.19350000 | 2.08527300    |                                           |             |             |               |
| H                            | 0.32592400  | -3.20585300 | 1.97020700    |                                           |             |             |               |
| H                            | 0.35263900  | -1.00619200 | 2.91174100    |                                           |             |             |               |
| C                            | -1.69478100 | -3.16696500 | -3.21745300   |                                           |             |             |               |
| H                            | -1.90339400 | -2.82488300 | -4.24147100   |                                           |             |             |               |
| H                            | -1.11633300 | -4.09621000 | -3.28137700   |                                           |             |             |               |
| H                            | -2.66988100 | -3.38017700 | -2.75422000   |                                           |             |             |               |
| K                            | 1.40942800  | -4.14516800 | -0.42992400   |                                           |             |             |               |
| K                            | -3.98051400 | -0.06020700 | -1.32028300   |                                           |             |             |               |
| N                            | -1.55166600 | -0.46317800 | 2.22560700    |                                           |             |             |               |
| C                            | -1.62897000 | -3.01407600 | 0.88245100    |                                           |             |             |               |
| H                            | -1.86710600 | -4.04920800 | 1.19943400    |                                           |             |             |               |
| H                            | -1.47212300 | -3.10642400 | -0.22034000   |                                           |             |             |               |
| H                            | -1.46595000 | 0.51776600  | 2.46665600    |                                           |             |             |               |
| <b>Mn-1<sub>k</sub>_1a-H</b> |             |             |               | <b>Mn-OiPr<sub>o</sub>-1<sub>2k</sub></b> |             |             |               |
| Mn                           | 1.41550948  |             | -0.86940884   | Mn                                        | 0.51361272  |             | -0.93265541   |
|                              | -0.19647340 |             | C 0.55909845  |                                           | -0.06613103 |             | C -1.36307884 |
|                              | 1.56302834  | 1.33168297  |               |                                           | 1.17290120  | -1.08318220 | C             |
|                              | -0.92983912 |             |               |                                           | 0.88138840  |             | 1.87997906    |
|                              | 1.56658823  |             | N 0.29341905  |                                           | -1.03542396 |             | N -0.03934926 |
|                              | 0.22275731  | 1.14692933  |               |                                           | 0.88979742  | -0.90505217 | N             |
|                              | -0.30731040 |             |               |                                           | -1.76800300 |             | 2.45438963    |
|                              | 2.02241373  |             | N -1.78044590 |                                           | -1.41149302 |             | N 0.51370717  |
|                              | 0.52806330  | 2.29956685  |               |                                           | 3.12993693  | -1.49706361 | C             |
|                              | -1.40849248 |             |               |                                           | -0.79576163 |             | 3.33391894    |
|                              | 2.48562830  |             | N -1.35682688 |                                           | -1.63076005 |             | N 2.16152699  |
|                              | -1.46591158 | 1.23694668  |               |                                           | 1.69852535  | -0.71928794 | N             |

|             |             |   |             |             |             |               |
|-------------|-------------|---|-------------|-------------|-------------|---------------|
| 1.62832947  |             |   | 2.14050515  | -2.30840303 |             | 0.26522231    |
| 0.80094001  |             | P | -0.28818062 | -0.89743740 |             | P 2.49199558  |
| -2.33425858 | 0.24102942  |   | P           | 0.18080842  | 0.00062859  | P             |
| 2.62001264  |             |   | 1.07658190  | -1.72458930 |             | -1.25986183   |
| -0.07692222 |             | C | 2.98429324  | -0.37566264 |             | C -2.79090538 |
| 2.12687540  | -1.58860568 |   | H           | -1.55887887 | 1.13465543  | H             |
| 1.96548206  |             |   | 2.46489989  | -2.69753036 |             | -0.57411136   |
| -1.85758144 |             | C | 4.20574843  | 1.62400078  |             | C -2.43668273 |
| 1.13929561  | 0.89954901  |   | H           | -2.39669436 | -1.67108138 | H             |
| 4.46414910  |             |   | 2.21279973  | -3.53392281 |             | -2.35459243   |
| 0.92310426  |             | C | 3.52762996  | -1.54865520 |             | C -2.17195809 |
| 1.34795445  | -2.77555198 |   | H           | -2.56728051 | 2.08822155  | H             |
| 3.69081188  |             |   | 2.01632902  | -2.80181182 |             | -2.69386586   |
| -3.63516930 |             | H | 4.49208119  | 2.98372866  |             | H -2.04965595 |
| 0.86699368  | -2.55703381 |   | H           | -3.56397575 | 1.63659963  | H             |
| 2.84465213  |             |   | 0.55258823  | -1.18455715 |             | -2.21217594   |
| -3.09983721 |             | C | 3.81020873  | 2.40962164  |             | C -4.25236675 |
| 3.36625027  | -1.27892892 |   | H           | -1.84995583 | 0.83699750  | H             |
| 4.86677302  |             |   | 3.11841101  | -4.40073360 |             | -2.86541040   |
| -1.09633892 |             | H | 3.79674932  | 0.43705705  |             | H -4.86078041 |
| 4.06814047  | -2.12811636 |   | H           | -1.78781512 | 1.75475747  | H             |
| 3.44094862  |             |   | 3.89949280  | -4.68776532 |             | -1.15634381   |
| -0.38944973 |             | C | 5.33665667  | 0.09765759  |             | C -1.96745658 |
| 0.36642885  | 0.24026649  |   | H           | -3.82613611 | -1.44411075 | H             |
| 5.07949973  |             |   | -0.69342948 | -0.87298516 |             | -3.90341375   |
| 0.09770906  |             | H | 5.61445187  | -1.53116091 |             | H -2.24395049 |
| 0.77713131  | -0.74095274 |   | H           | -4.20942986 | -0.45069237 | H             |
| 6.24140369  |             |   | 0.39513791  | -2.40389231 |             | -4.50894446   |
| 0.86656706  |             | C | 3.96287164  | -2.18976438 |             | C -2.11862238 |
| 0.70690138  | 2.33757794  |   | H           | -1.90461583 | -3.07470071 | H             |
| 4.86494728  |             |   | 0.88546032  | -2.59331473 |             | -2.55669942   |
| 2.94240009  |             | H | 3.13945824  | -3.82491121 |             | H -2.48690785 |
| 1.27296295  | 2.79397296  |   | H           | -0.88210474 | -3.23397949 | H             |
| 3.72930570  |             |   | -0.36290906 | -1.03951642 |             | -1.91124628   |
| 2.41773651  |             | C | -1.46982935 | -3.27857529 |             | C 3.34923662  |
| -2.86314266 | -1.10925633 |   | H           | 0.68352309  | 1.59335696  | H             |
| -1.92200205 |             |   | -1.88450348 | 2.51506603  |             | 0.99074941    |
| -1.35173394 |             | C | 0.00017972  | 2.24057212  |             | C 3.96424851  |
| -3.88170153 | 1.23479925  |   | H           | -0.46716330 | -0.96965830 | H             |
| -1.00915983 |             |   | -4.31261344 | 4.85519896  |             | 0.02228821    |
| 1.36321155  |             | C | -0.81805541 | -0.53099856 |             | C 4.03582283  |
| -3.38080106 | -2.37954631 |   | H           | -0.49669266 | 2.26225670  | H             |
| -1.57573063 |             |   | -3.52386435 | 4.34962407  |             | -0.23521410   |
| -3.16642632 |             | H | -0.06331220 | 3.28504577  |             | H 3.37154643  |
| -2.68940102 | -2.77388679 |   | H           | -1.37069564 | 2.33860960  | H             |
| -0.32186037 |             |   | -4.35183355 | 4.94359943  |             | -0.80981787   |
| -2.23447759 |             | C | -2.57864693 | 1.72262510  |             | C 4.27579593  |
| -3.78459835 | -0.62405231 |   | H           | 1.87952792  | 1.44810163  | H             |
| -3.00109016 |             |   | -3.46282187 | 3.71900043  |             | 2.77799794    |
| 0.34077417  |             | H | -3.40003041 | 1.14290304  |             | H 4.77056581  |
| -3.82892287 | -1.35790495 |   | H           | 2.11227842  | 2.40476334  | H             |
| -2.22376253 |             |   | -4.81805654 | 5.07913704  |             | 1.70683044    |
| -0.48850613 |             | C | 0.87918362  | 0.71127127  |             | C 4.12206821  |
| -4.88433230 | 0.50449259  |   | H           | -1.97491212 | -0.80339085 | H             |
| 1.87621751  |             |   | -4.47180039 | 3.35637376  |             | -2.51982870   |
| 0.29124845  |             | H | 1.02922699  | -1.37068861 |             | H 5.10292636  |
| -5.78711359 | 1.11610457  |   | H           | -2.30490040 | -1.18056872 | H             |

|                                           |             |            |                 |             |             |             |
|-------------------------------------------|-------------|------------|-----------------|-------------|-------------|-------------|
| 0.44440848                                |             |            | -5.21179257     | 4.04055439  |             | -2.30714460 |
| -0.45060064                               |             | C          | 0.52651990      | 0.24005192  | C           | 3.89495900  |
| -3.54425173                               | 2.62111095  |            | H               | -0.08459610 | -2.43945436 | H           |
| -0.11826595                               |             |            | -2.81374679     | 3.92053051  |             | 1.00515235  |
| 3.12832825                                |             | H          | 0.56267251      | -2.58735541 | H           | 4.74300376  |
| -4.45071253                               | 3.24454699  |            | H               | -0.51782611 | -2.99306918 | H           |
| 1.54539139                                |             |            | -3.13626565     | 2.97500405  |             | -0.45770918 |
| 2.58962549                                |             | C          | 2.61615559      | -2.91232456 | C           | 0.95112086  |
| -1.82326181                               | 0.63843354  |            | O               | -1.71295021 | -1.57550786 | O           |
| 3.44495313                                |             |            | -2.48771903     | 1.22417711  |             | -2.27058399 |
| 1.13571928                                |             | C          | 2.02574242      | -2.57682521 | C           | 0.98887049  |
| -1.53876618                               | -1.71500723 |            | O               | -2.38303349 | 0.85091274  | O           |
| 2.40815561                                |             |            | -1.96540747     | 1.33542397  |             | -3.32285683 |
| -2.73622086                               |             | H          | 0.02708241      | 1.45348505  | H           | 0.73669660  |
| 0.08489014                                | -1.31699375 |            | C               | 1.70028060  | 1.73420154  | C           |
| -5.42227456                               |             |            | 1.25524812      | -1.21944579 |             | 4.71967141  |
| -0.85331317                               |             | C          | -4.69545590     | -2.01942853 | H           | -1.28295858 |
| 0.51452557                                | -1.79133335 |            | C               | 5.36481934  | -1.12914252 | H           |
| -3.30887141                               |             |            | 0.65440817      | -0.49215157 |             | 5.18246254  |
| -1.93556462                               |             | C          | -2.56837382     | -2.69896964 | H           | -2.20499856 |
| 1.58517742                                | -1.10494022 |            | C               | 4.71532242  | -2.49987129 | C           |
| -3.35387448                               |             |            | 2.34928911      | -0.07725505 |             | 1.11350249  |
| -0.18107248                               |             | C          | -4.72643837     | 2.24390516  | C           | -1.29316060 |
| 2.19000106                                | -0.06378594 |            | H               | 2.05925376  | 2.21883026  | H           |
| -3.10962884                               |             |            | -0.56685774     | -2.17495728 |             | 1.53482699  |
| -3.74598579                               |             | H          | -6.50687367     | 2.63315514  | H           | -1.13849132 |
| 1.15242286                                | -0.77603948 |            | H               | 2.97497576  | 2.81476217  | H           |
| -5.21663143                               |             |            | -0.17954614     | -1.50349984 |             | 2.37286619  |
| -2.46097246                               |             | C          | -2.56322004     | 1.18333947  | C           | 0.36119195  |
| 0.00642821                                | -2.98924268 |            | H               | 0.88961359  | 3.69367710  | H           |
| -2.83767896                               |             |            | 3.07281785      | 0.65986808  |             | 1.81581880  |
| 0.45890690                                |             | H          | -5.27375684     | 4.21387903  | H           | -0.46073047 |
| 2.80416038                                | 0.65886014  |            | C               | 0.42552140  | 4.26255129  | H           |
| -0.49194263                               |             |            | 0.88770502      | 1.20281305  |             | 0.18171862  |
| -1.99664064                               |             | C          | -1.22405652     | 3.72875644  | O           | -0.34655525 |
| 0.14123254                                | -3.05473676 |            | H               | -0.07358702 | 1.63865600  | K           |
| 0.39224023                                |             |            | 1.38808814      | 3.03625297  |             | 3.95329706  |
| -2.43169552                               |             | H          | -0.64373659     | -1.57884798 | K           | -3.95454513 |
| -0.32727855                               | -3.85602549 |            | N               | 1.97291148  | 0.10188835  |             |
| -1.25031083                               |             |            | 1.79338358      |             |             |             |
| -1.20388010                               |             | C          | -2.33130627     |             |             |             |
| 2.64072198                                | 3.30451337  |            | H               |             |             |             |
| -3.38329875                               |             |            | 2.43592866      |             |             |             |
| 3.06291952                                |             | H          | -2.20119841     |             |             |             |
| 2.41036998                                | 4.37230891  |            | H               |             |             |             |
| -2.12190979                               |             |            | 3.70865083      |             |             |             |
| 3.16988448                                |             | K          | -0.05061197     |             |             |             |
| 4.01386433                                | -0.10660957 |            | K               |             |             |             |
| -3.87408681                               | -0.60032836 | 1.06138679 |                 |             |             |             |
| <b>Mn-OiPr<sub>H</sub>-1<sub>2K</sub></b> |             |            | <b>TS-1A-H'</b> |             |             |             |
| Mn                                        | -0.09214359 |            | -1.13586817     | Mn          | 1.27360558  | -0.82802626 |
| -0.07171347                               |             | C          | -0.99137983     | -0.26089894 | C           | 0.38534710  |
| 1.54039212                                | -1.01793969 |            | C               | 1.57732319  | 1.27058219  | C           |
| 1.34120178                                |             |            | 1.39986380      | -0.88063605 |             | -0.35043352 |
| -0.63152590                               |             | N          | 0.12929482      | 1.75100225  | N           | 0.20971423  |
| 0.78327971                                | -0.74809121 |            | N               | 0.21935931  | 1.17481599  | N           |
| -0.87566482                               |             |            | 2.89607351      | -0.50903312 |             | 2.34663074  |

|             |             |   |             |             |             |   |             |
|-------------|-------------|---|-------------|-------------|-------------|---|-------------|
| -1.22686996 |             | N | 1.47972183  | 1.98780128  |             | N | -1.68066697 |
| 2.73720417  | -0.91343190 |   | C           | 0.36991578  | 2.61338150  |   | C           |
| 0.34881948  |             |   | 3.39628513  | -1.44751425 |             |   | 1.68426226  |
| -1.18571426 |             | N | 2.42514110  | 2.65255208  |             | N | -1.23632437 |
| 0.74868117  | -0.20350109 |   | N           | -1.60814611 | 1.48947924  |   | N           |
| -2.20267912 |             |   | 1.01565813  | 1.37181787  |             |   | 2.19605372  |
| -1.04368043 |             | P | 2.13636347  | 0.64782826  |             | P | -0.28058391 |
| -0.88170496 | 0.19553678  |   | P           | -2.35375881 | 0.28380235  |   | P           |
| -2.26576393 |             |   | -0.61427005 | 2.35431158  |             |   | 1.16151847  |
| -0.55292559 |             | C | -3.52701324 | -0.29917096 |             | C | 2.47909873  |
| -0.54358955 | 0.81939217  |   | H           | 2.13437870  | -1.88849918 |   | H           |
| -3.00385296 |             |   | 0.14123170  | 1.40730755  |             |   | 2.25138658  |
| 1.51623734  |             | C | -3.17940639 | -2.12734887 |             | C | 4.01635790  |
| -1.44999114 | -1.94824627 |   | H           | 1.42118732  | 0.51559323  |   | H           |
| -4.22663002 |             |   | -1.11299013 | 4.24419914  |             |   | 2.49219247  |
| -1.83870618 |             | C | -3.76118093 | 0.36490007  |             | C | 3.11844127  |
| -1.86849119 | 1.52722167  |   | H           | 1.37973287  | -3.04389301 |   | H           |
| -4.29943344 |             |   | -1.70869793 | 2.96061345  |             |   | 1.92307608  |
| 2.47508398  |             | H | -4.38033916 | -3.98932367 |             | H | 4.20665137  |
| -2.55475486 | 0.92865689  |   | H           | 1.26878180  | -2.92539108 |   | H           |
| -2.82620573 |             |   | -2.39275213 | 2.69999084  |             |   | 0.37292598  |
| 1.76887317  |             | C | -4.84223329 | -3.17066272 |             | C | 3.08804472  |
| 0.10226077  | 0.40239632  |   | H           | 3.51894900  | -1.72097009 |   | H           |
| -5.50609954 |             |   | -0.60876915 | 4.18590208  |             |   | 3.47856251  |
| -0.11396895 |             | H | -5.40272992 | -1.64132060 |             | H | 2.86334831  |
| 0.46227414  | 1.28162286  |   | H           | 4.15860452  | -2.59064564 |   | H           |
| -4.69807361 |             |   | 0.94777899  | 2.72690014  |             |   | 4.03287534  |
| -0.28862562 |             | C | -3.14070695 | -0.81559201 |             | C | 5.11123886  |
| -2.96748470 | -1.82576736 |   | H           | 0.58535800  | -0.12879045 |   | H           |
| -2.13547977 |             |   | -3.36080214 | 4.89879801  |             |   | -0.49029846 |
| -2.02929480 |             | H | -3.43410785 | -0.04415977 |             | H | 5.24695608  |
| -3.32821119 | -0.83021684 |   | H           | 0.81205938  | -1.19544054 |   | H           |
| -3.82170317 |             |   | -3.43188381 | 6.07946273  |             |   | 0.76314539  |
| -2.55572036 |             | C | -2.68099478 | 0.36499095  |             | C | 3.92617971  |
| -0.97158163 | -3.30249718 |   | H           | 1.18446996  | 2.01532063  |   | H           |
| -3.25561704 |             |   | -1.44823999 | 4.89211815  |             |   | 1.40621887  |
| -4.11189147 |             | H | -2.78043454 | 2.49579290  |             | H | 3.16452820  |
| 0.11670424  | -3.40541922 |   | H           | 1.82646079  | 2.47792594  |   | H           |
| -1.62457622 |             |   | -1.22897972 | 3.68168496  |             |   | 0.14011278  |
| -3.46337772 |             | C | 2.88468940  | 2.25293453  |             | C | -1.57327454 |
| -1.06781607 | 1.90588769  |   | H           | -2.94765679 | -0.95011178 |   | H           |
| 2.06954805  |             |   | -0.72565845 | -1.75508203 |             |   | -2.05041825 |
| 2.56423734  |             | C | 3.37694178  | -1.56402967 |             | C | 0.19536139  |
| -1.80173629 | -0.86642453 |   | H           | -3.99038135 | 1.07405163  |   | H           |
| 4.35570188  |             |   | -1.64604052 | -0.70012026 |             |   | -4.63794928 |
| -0.36998810 |             | C | 3.17162132  | 0.99173037  |             | C | -1.04588619 |
| -2.51409346 | 2.27818622  |   | H           | -4.01972222 | -1.89076677 |   | H           |
| 3.42498873  |             |   | -2.58720012 | -1.76392103 |             |   | -4.20360091 |
| 3.34687029  |             | H | 2.30462097  | -2.70528474 |             | H | -0.09304056 |
| -3.16773770 | 2.10761649  |   | H           | -3.73033498 | -2.35703488 |   | H           |
| 4.02644641  |             |   | -2.92565385 | -0.89590135 |             |   | -4.98276020 |
| 1.72027178  |             | C | 4.09478478  | -1.37883495 |             | C | -2.89055299 |
| -0.17983723 | 2.14545002  |   | H           | -3.35581502 | -0.31107309 |   | H           |
| 3.81736830  |             |   | 0.88462118  | -3.36422488 |             |   | -2.51117375 |
| 2.13734134  |             | H | 4.54486961  | 0.21110282  |             | H | -3.60326562 |
| -0.38479782 | 3.12957145  |   | H           | -3.71716797 | -1.06975252 |   | H           |
| 4.88517481  |             |   | -0.33717980 | -2.76048572 |             |   | -4.17534543 |



|                              |             |   |             |             |             |   |             |
|------------------------------|-------------|---|-------------|-------------|-------------|---|-------------|
| 1.39207297                   |             | C | 3.10196078  | 0.41668606  |             | C | 1.35249629  |
| -3.29958382                  | -0.95118913 |   | H           | -4.66654603 | 0.34556347  |   | H           |
| 2.24695147                   |             |   | -3.50534300 | 2.30474810  |             |   | -4.17273438 |
| -1.60709859                  |             | H | 3.96991433  | 0.57740921  |             | H | 1.44716471  |
| -3.82257200                  | -1.38189260 |   | H           | -5.71726115 | 0.66195540  |   | H           |
| 2.88480407                   |             |   | -3.76982150 | 1.24901595  |             |   | -4.66006712 |
| 0.01537451                   |             | C | 3.44617214  | -0.74687844 |             | C | 0.52430643  |
| -1.19492813                  | -2.25980895 |   | H           | -3.81913138 | 2.54880892  |   | H           |
| 3.75058176                   |             |   | -0.14064640 | -0.33607101 |             |   | -3.46029139 |
| -2.24148812                  |             | H | 4.16227065  | 3.13195481  |             | H | 0.85436455  |
| -1.75007418                  | -2.88532228 |   | H           | -4.77436796 | 2.98667468  |   | H           |
| 2.47009720                   |             |   | -1.24712733 | 1.34152830  |             |   | -3.09704085 |
| -2.76533573                  |             | C | 0.09431612  | 2.69531161  |             | C | 2.52120504  |
| -2.04510359                  | -1.55129920 |   | O           | -1.60924797 | 0.71466842  |   | O           |
| 0.22577445                   |             |   | -2.64975631 | 3.38095737  |             |   | -2.13144642 |
| -2.54865259                  |             | C | -0.30730651 | 1.32417499  |             | C | 1.80362997  |
| -2.60802629                  | 0.89989777  |   | O           | -1.59143949 | -1.76674655 |   | O           |
| -0.42705560                  |             |   | -3.56251158 | 2.07747118  |             |   | -2.10531016 |
| 1.56634059                   |             | H | -0.29727238 | -2.78491430 |             | H | 0.14354057  |
| 0.09607383                   | 1.51732467  |   | C           | 0.10480994  | -1.22509486 |   | C           |
| 0.48574092                   |             |   | 4.87138952  | -2.38517458 |             |   | 2.49972033  |
| -1.41827833                  |             | H | 1.37043525  | 3.49256936  |             | H | -2.63484746 |
| 5.09364642                   | -2.02964779 |   | H           | 1.97751327  | 4.42582971  |   | H           |
| -0.40368856                  |             |   | 5.27792438  | -1.95354237 |             |   | 3.47756219  |
| -1.91233471                  |             | H | 0.61421748  | 3.73456412  |             | H | -3.33296212 |
| 5.40126196                   | -0.46117315 |   | K           | 2.67038260  | 2.95844311  |   | K           |
| -2.97216512                  |             |   | 3.01253537  | -0.21174276 |             |   | 4.13539780  |
| 0.59167748                   |             | C | -0.58374587 | -0.11274036 |             | C | -1.10374700 |
| 0.88368986                   | 2.39012052  |   | C           | 1.13147392  | -1.90335498 |   | C           |
| 0.69330276                   |             |   | 1.71164820  | -2.22811626 |             |   | 0.69461566  |
| 2.61107638                   |             | H | 0.50494775  | -0.99187886 |             | H | -3.17796792 |
| 2.38978285                   | 3.45904355  |   | H           | 1.00659283  | -1.46050819 |   | H           |
| 1.59734398                   |             |   | 1.12835038  | -2.27786666 |             |   | -0.38282667 |
| 2.84142608                   |             | H | 0.88738423  | -0.80537028 |             | H | -2.15451035 |
| 2.33967376                   | 1.72775958  |   | C           | 1.21296194  | -0.02647277 |   | C           |
| -0.85303342                  |             |   | -0.05376339 | -0.97742500 |             |   | 0.42238600  |
| 3.57151005                   |             | H | -0.01350154 | -3.23120298 |             | H | -1.09359986 |
| -0.73928096                  | 3.77506901  |   | H           | -0.66666419 | -3.15261422 |   | H           |
| -1.04806845                  |             |   | 0.53772165  | -1.75798645 |             |   | 0.81047330  |
| 4.48029616                   |             | H | -1.74384749 | -3.90890778 |             | H | -0.00450041 |
| -0.66772076                  | 3.37734364  |   | O           | 0.63500359  | -3.69070421 |   | O           |
| -1.59488736                  |             |   | 1.65309364  | -0.74804115 |             |   | 2.32915286  |
| 2.05102186                   |             | K | 3.88540929  | -1.82067175 |             | K | -3.11283661 |
| 2.85384445                   | 0.15472064  |   |             | -1.76705805 | 3.24157283  |   |             |
| <b>MnH-1<sub>2k</sub>-1A</b> |             |   |             |             |             |   |             |
| Mn                           | 0.00342425  |   |             | -1.28558943 |             |   |             |
| -0.34907007                  |             | C |             | -0.92833525 |             |   |             |
| 1.53982247                   | -0.82391975 |   |             |             |             | C |             |
| 1.40972949                   |             |   |             | 1.34552553  |             |   |             |
| -0.65777683                  |             | N |             | 0.18704036  |             |   |             |
| 0.75658504                   | -0.71340900 |   |             |             |             | N |             |
| -0.81095928                  |             |   |             | 2.90903650  |             |   |             |
| -0.96360935                  |             | N |             | 1.55938203  |             |   |             |
| 2.69352876                   | -0.91895344 |   |             |             |             | C |             |
| 0.42574436                   |             |   |             | 3.38533631  |             |   |             |
| -1.04407299                  |             | N |             | 2.49749397  |             |   |             |
| 0.65521325                   | -0.32290610 |   |             |             |             | N |             |

|             |             |   |             |
|-------------|-------------|---|-------------|
| -2.14428997 |             |   | 1.02115286  |
| -0.75382396 |             | P | 2.16180498  |
| -0.97789559 | 0.08482842  |   | P           |
| -2.14372324 |             |   | -0.68282516 |
| -0.52755056 |             | C | -3.26407844 |
| -0.81191660 | 0.97462837  |   | H           |
| -2.82330411 |             |   | -0.01444864 |
| 1.59921617  |             | C | -3.23719004 |
| -1.24894067 | -1.93185188 |   | H           |
| -4.23554258 |             |   | -0.81117506 |
| -1.75173742 |             | C | -3.11701839 |
| -2.11941150 | 1.73354486  |   | H           |
| -3.69177845 |             |   | -2.09404021 |
| 2.67398451  |             | H | -3.48216870 |
| -2.98335901 | 1.15756601  |   | H           |
| -2.06609945 |             |   | -2.32143387 |
| 1.98119358  |             | C | -4.72099912 |
| -0.45651348 | 0.72743196  |   | H           |
| -5.25354446 |             |   | -1.25623533 |
| 0.18939251  |             | H | -5.25925112 |
| -0.30610433 | 1.67783193  |   | H           |
| -4.83670530 |             |   | 0.46134034  |
| 0.12840731  |             | C | -3.34726635 |
| -2.76577367 | -1.93895357 |   | H           |
| -2.35819178 |             |   | -3.23085202 |
| -2.07410016 |             | H | -3.76893348 |
| -3.16580368 | -1.00474105 |   | H           |
| -3.99042363 |             |   | -3.11449753 |
| -2.76215899 |             | C | -2.73144406 |
| -0.71286429 | -3.26118307 |   | H           |
| -3.41668572 |             |   | -0.99605976 |
| -4.07588556 |             | H | -2.65303284 |
| 0.38303649  | -3.25026119 |   | H           |
| -1.74244570 |             |   | -1.11831081 |
| -3.51515124 |             | C | 2.78139692  |
| -1.06345004 | 1.85404859  |   | H           |
| 1.95895474  |             |   | -0.56757054 |
| 2.39976157  |             | C | 3.49466486  |
| -1.94494973 | -0.81696256 |   | H           |
| 4.41143751  |             |   | -1.89836655 |
| -0.19709147 |             | C | 2.86754937  |
| -2.49539937 | 2.35620327  |   | H           |
| 3.04147135  |             |   | -2.52200637 |
| 3.44348016  |             | H | 1.94369319  |
| -3.05791829 | 2.15562672  |   | H           |
| 3.70286347  |             |   | -3.04198651 |
| 1.89031786  |             | C | 4.06316174  |
| -0.28983373 | 2.11024396  |   | H           |
| 3.94777152  |             |   | 0.77451534  |
| 1.85561992  |             | H | 4.35886536  |
| -0.34928259 | 3.17040134  |   | H           |
| 4.91072396  |             |   | -0.68649560 |
| 1.52590851  |             | C | 3.07800197  |
| -3.40409651 | -0.96423817 |   | H           |
| 2.24788758  |             |   | -3.50259056 |
| -1.67804345 |             | H | 3.91360428  |
| -4.01403131 | -1.34262437 |   | H           |

|                |             |   |             |              |             |            |             |
|----------------|-------------|---|-------------|--------------|-------------|------------|-------------|
| 2.73704491     |             |   | -3.85440751 |              |             |            |             |
| -0.02228214    |             | C | 3.80033482  |              |             |            |             |
| -1.34170205    | -2.17858262 |   | H           |              |             |            |             |
| 4.25031299     |             |   | -0.34027170 |              |             |            |             |
| -2.10342377    |             | H | 4.50269271  |              |             |            |             |
| -1.97793015    | -2.74011659 |   | H           |              |             |            |             |
| 2.88838300     |             |   | -1.24769264 |              |             |            |             |
| -2.78763959    |             | C | 0.25332034  |              |             |            |             |
| -1.81251884    | -2.02982953 |   | O           |              |             |            |             |
| 0.43526574     |             |   | -2.22863558 |              |             |            |             |
| -3.11555968    |             | C | -0.16252531 |              |             |            |             |
| -2.93876602    | 0.25490538  |   | O           |              |             |            |             |
| -0.25791661    |             |   | -4.02352175 |              |             |            |             |
| 0.69172079     |             | H | -0.24600481 |              |             |            |             |
| -0.83453194    | 1.22936594  |   | C           |              |             |            |             |
| 0.56197536     |             |   | 4.86751854  |              |             |            |             |
| -1.23176158    |             | H | 1.50132409  |              |             |            |             |
| 5.12395356     | -1.73802943 |   | H           |              |             |            |             |
| -0.27849199    |             |   | 5.27448977  |              |             |            |             |
| -1.80705129    |             | H | 0.56962667  |              |             |            |             |
| 5.37837816     | -0.25573388 |   | K           |              |             |            |             |
| -3.19742133    |             |   | 3.18387911  |              |             |            |             |
| 0.27521008     |             | C | -1.10290676 |              |             |            |             |
| 1.77340889     | 2.86543635  |   | C           |              |             |            |             |
| 0.29922865     |             |   | 1.94697161  |              |             |            |             |
| 2.38969128     |             | H | 1.02023448  |              |             |            |             |
| 1.91239464     | 3.21920973  |   | H           |              |             |            |             |
| 0.51482195     |             |   | 1.06550456  |              |             |            |             |
| 1.75444607     |             | H | 0.42888698  |              |             |            |             |
| 2.86284198     | 1.80092074  |   | C           |              |             |            |             |
| -1.34018310    |             |   | 0.60625446  |              |             |            |             |
| 3.76877524     |             | H | -1.06705418 |              |             |            |             |
| -0.30542665    | 3.20551007  |   | H           |              |             |            |             |
| -0.67666984    |             |   | 0.63745906  |              |             |            |             |
| 4.64490938     |             | H | -2.38624958 |              |             |            |             |
| 0.54636260     | 4.08959747  |   | O           |              |             |            |             |
| -2.01802647    |             |   | 2.49304421  |              |             |            |             |
| 2.48277021     |             | K | 4.19834251  |              |             |            |             |
| 2.46995113     | -0.96044998 |   |             |              |             |            |             |
| <b>2H-Mn-5</b> |             |   |             | <b>Mn-5'</b> |             |            |             |
| P              | 0.32159337  |   | 0.11048416  | P            | 0.38696289  |            | 0.13985825  |
| -2.20074844    |             | P | 0.32159337  | -2.23784688  | P           | 0.38696289 | 0.13985825  |
| 0.11048416     | 2.20074844  |   | C           | 2.23784688   |             | C          | 2.04182818  |
| 1.94633111     |             |   | -0.78129739 | -0.64038920  | -2.44213276 | C          | 2.04182818  |
| -2.41792726    |             | C | 1.94633111  | -0.64038920  | 2.44213276  |            | H           |
| -0.78129739    | 2.41792726  |   | H           | 2.75355427   |             |            | 0.19288671  |
| 2.74631301     |             |   | -0.02096992 | -2.55874678  |             | H          | 2.75355427  |
| -2.42905740    |             | H | 2.74631301  | 0.19288671   | 2.55874678  |            | H           |
| -0.02096992    | 2.42905740  |   | H           | 2.11985992   |             |            | -1.25938880 |
| 2.02104907     |             |   | -1.31971617 | -3.35055929  |             | H          | 2.11985992  |
| -3.37483152    |             | H | 2.02104907  | -1.25938880  | 3.35055929  | C          | 2.36890106  |
| -1.31971617    | 3.37483152  |   | C           | -1.42300976  | -1.18182950 | C          | 2.36890106  |
| 2.14635720     |             |   | -1.71435180 | -1.42300976  | 1.18182950  |            | H           |
| -1.23856266    |             | C | 2.14635720  | 3.46965565   |             |            | -1.44978520 |
| -1.71435180    | 1.23856266  |   | H           | -1.04232584  |             | H          | 3.46965565  |
| 3.15911255     |             |   | -2.16324459 | -1.44978520  | 1.04232584  |            | H           |
| -1.24858814    |             | H | 3.15911255  | 2.08931051   |             |            | -2.49189865 |

|             |             |   |             |             |               |   |             |
|-------------|-------------|---|-------------|-------------|---------------|---|-------------|
| -2.16324459 | 1.24858814  |   | H           | -1.30597728 |               | H | 2.08931051  |
| 1.42535646  |             |   |             | -2.49189865 | 1.30597728    |   | N           |
| -1.26869847 |             | H | 1.42535646  | 1.73022076  |               |   | -0.86210592 |
| -2.54898382 | 1.26869847  |   | N           | 0.00000000  |               | C | 0.47582475  |
| 1.90601778  |             |   | -0.97012744 | 1.62129606  | 3.35931364    |   | C           |
| 0.00000000  |             | C | 0.71750412  | 0.47582475  |               |   | 1.62129606  |
| 1.77400955  | 2.95917464  |   | C           | -3.35931364 |               | H | 1.39309252  |
| 0.71750412  |             |   | 1.77400955  | 2.11255633  | 2.98355209    |   | H           |
| -2.95917464 |             | H | 1.66590961  | 1.39309252  |               |   | 2.11255633  |
| 2.00956471  | 2.44157803  |   | H           | -2.98355209 |               | C | -0.75822092 |
| 1.66590961  |             |   | 2.00956471  | -1.07847909 | 3.07039970    |   | C           |
| -2.44157803 |             | C | -0.79055031 | -0.75822092 |               |   | -1.07847909 |
| -0.73010323 | 3.44598788  |   | C           | -3.07039970 |               | C | -0.83530082 |
| -0.79055031 |             |   | -0.73010323 | -2.34416519 | 2.22787131    |   | C           |
| -3.44598788 |             | C | -0.72011071 | -0.83530082 |               |   | -2.34416519 |
| -2.24714478 | 3.34947030  |   | C           | -2.22787131 |               | O | 0.89668326  |
| -0.72011071 |             |   | -2.24714478 | 3.23601260  | 0.00000000    |   | H           |
| -3.34947030 |             | O | -2.46315432 | -0.28198616 |               |   | -1.32570769 |
| 1.68006677  | 0.00000000  |   | H           | -4.03805442 |               | H | -0.28198616 |
| -0.42528977 |             |   | -0.43433074 | -1.32570769 | 4.03805442    |   | C           |
| -4.44600748 |             | H | -0.42528977 | -2.14649272 |               |   | -0.51671991 |
| -0.43433074 | 4.44600748  |   | C           | -3.33639172 |               | C | -2.14649272 |
| -2.22185666 |             |   | -0.24270488 | -0.51671991 | 3.33639172    |   | H           |
| -3.27235369 |             | C | -2.22185666 | -2.14246222 |               |   | 0.28398772  |
| -0.24270488 | 3.27235369  |   | H           | -4.08740049 | H -2.14246222 |   | 0.28398772  |
| -2.31665277 |             |   | 0.84839889  | 4.08740049  |               | H | -2.61258159 |
| -3.36382825 |             | H | -2.31665277 | -0.11795742 | -2.42353203   |   | H           |
| 0.84839889  | 3.36382825  |   | H           | -2.61258159 |               |   | -0.11795742 |
| -2.61400672 |             |   | -0.52020825 | 2.42353203  |               | H | -2.80873508 |
| -2.28196088 |             | H | -2.61400672 | -1.30847229 | -3.71824479   |   | H           |
| -0.52020825 | 2.28196088  |   | H           | -2.80873508 |               |   | -1.30847229 |
| -2.88291201 |             |   | -0.69427165 | 3.71824479  | C -0.66937863 |   | 2.60385935  |
| -4.02737417 |             | H | -2.88291201 | 3.15581342  | C -0.66937863 |   | 2.60385935  |
| -0.69427165 | 4.02737417  |   | C           | -3.15581342 | H -1.62261352 |   | 2.22595116  |
| -0.27578973 |             |   | 2.85630261  | 3.54983478  |               | H | -1.62261352 |
| 2.56774504  |             | C | -0.27578973 | 2.22595116  | -3.54983478   |   | H           |
| 2.85630261  | -2.56774504 |   | H           | -0.82403727 |               |   | 2.84805051  |
| -1.27789970 |             |   | 2.68227441  | 2.09683382  |               | H | -0.82403727 |
| 2.98656370  |             | H | -1.27789970 | 2.84805051  | -2.09683382   |   | H           |
| 2.68227441  | -2.98656370 |   | H           | -0.45724771 |               |   | 3.54658062  |
| -0.37971115 |             |   | 2.92839269  | 3.68170559  |               | H | -0.45724771 |
| 1.47724161  |             | H | -0.37971115 | 3.54658062  | -3.68170559   | C | 0.68508115  |
| 2.92839269  | -1.47724161 |   | H           | 1.26594889  | 4.82319804    |   | C           |
| 0.06059404  |             |   | 3.83569842  | 0.68508115  |               |   | 1.26594889  |
| 2.94059939  |             | H | 0.06059404  | -4.82319804 |               | H | 1.53540787  |
| 3.83569842  | -2.94059939 |   | C           | 0.58539932  | 4.97655238    |   | H           |
| 0.97489578  |             |   | 1.74589159  | 1.53540787  |               |   | 0.58539932  |
| 4.45700150  |             | C | 0.97489578  | -4.97655238 | H -0.20487573 |   | 0.78712495  |
| 1.74589159  | -4.45700150 |   | H           | 5.25941090  |               | H | -0.20487573 |
| 1.66820315  |             |   | 0.94638885  | 0.78712495  | -5.25941090   |   | H           |
| 4.75984467  |             | H | 1.66820315  | 0.88177909  |               |   | 2.16979086  |
| 0.94638885  | -4.75984467 |   | H           | 5.41951214  |               | H | 0.88177909  |
| 0.04375153  |             |   | 1.61095286  | 2.16979086  | -5.41951214   |   | H           |
| 5.02824753  |             | H | 0.04375153  | -1.48097986 |               |   | -3.09388728 |
| 1.61095286  | -5.02824753 |   | H           | 2.70951670  |               | H | -1.25986746 |
| 1.41204750  |             |   | 2.69844601  | -2.12960851 | 1.23494455    |   | H           |
| 4.79344440  |             | H | 1.41204750  | 0.14645993  |               |   | -2.81147821 |

|                   |             |    |                                         |               |               |
|-------------------|-------------|----|-----------------------------------------|---------------|---------------|
| 2.69844601        | -4.79344440 | H  | 2.06975360                              | H             | -1.48097986   |
| -1.38988591       |             |    | -3.09388728                             | -2.70951670   | H 0.14645993  |
| 4.09446315        |             | H  | -2.81147821                             | -2.06975360   | H             |
| -2.61235745       | 2.36514326  | H  | -1.25986746                             |               | -2.12960851   |
| 0.28580220        |             |    | -1.23494455                             | C 0.58663502  | 2.10604753    |
| 3.54681960        |             | H  | 0.00000000                              |               | Mn 0.26721717 |
| -2.70284331       | -4.09446315 | H  | 0.38009876                              | 0.00000000    | C             |
| 0.28580220        |             |    | -1.49208668                             |               | 0.61731112    |
| -3.54681960       |             | H  | 0.00000000                              |               | O -2.65769084 |
| -2.61235745       | -2.36514326 | C  | 0.74956265                              | 0.00000000    |               |
| -1.50994713       |             |    |                                         |               | 1.00168397    |
| 0.00000000        |             | Mn |                                         |               | -0.05742550   |
| -0.00120624       | 0.00000000  |    |                                         |               | C             |
| -0.99303598       |             |    |                                         |               | -1.51772797   |
| 0.00000000        |             | O  |                                         |               | -1.65957863   |
| -2.48631220       | 0.00000000  |    |                                         |               | H             |
| 0.86502062        |             |    |                                         |               | 1.36362295    |
| 0.00000000        |             | H  |                                         |               | 2.51025208    |
| -0.14676720       | 0.00000000  |    |                                         |               |               |
| <b>2H-Mn-5_1a</b> |             |    | <b>TSB-1a-H<sub>H</sub><sup>-</sup></b> |               |               |
| P                 | -0.80167737 |    | P                                       | -0.89186666   | 1.78340090    |
| 0.13513448        |             | C  | -0.22379601                             | C -1.55820970 | 1.22814078    |
| 1.33804259        | -1.50939725 |    | -1.86351080                             | C -0.44365241 | 0.57367720    |
| -0.50410081       |             |    | -2.65438530                             | H -2.05116243 | 2.02899015    |
| -2.44338469       |             | H  | -2.43333555                             | H -2.33512242 | 0.47677979    |
| 2.17727279        | -1.95234885 |    | -1.64570644                             | H -0.84538284 | 0.08486418    |
| -2.31585312       |             |    | -3.56356803                             | H 0.29811566  | 1.31659443    |
| -1.32786255       |             | H  | -2.99591341                             | N 0.24125339  | -0.40414762   |
| 0.39517131        | -3.36542511 |    | -1.79883397                             | C 1.27653786  | -1.16236017   |
| 0.17717401        |             |    | -2.50906559                             | C 1.96931201  | -2.10948116   |
| -2.76073411       |             | N  | -1.54827677                             | H 1.99490734  | -0.44344269   |
| -0.19178694       | -1.73583822 |    | -2.93851025                             | H 0.84071205  | -1.71895634   |
| 1.30415267        |             |    | -3.36085148                             | H 1.24337683  | -2.86449954   |
| -2.57041825       |             | C  | -1.19889834                             | H 2.78372540  | -2.66565334   |
| -1.83674402       | -1.73059293 |    | -2.03783146                             | P 2.51387355  | -1.15293307   |
| 1.97332672        |             |    | -0.05293958                             | Mn 0.95881744 | 0.49595287    |
| -2.95925907       |             | H  | 0.84265115                              | C 1.98553969  | 1.67208567    |
| -1.33113874       | -3.44949049 |    | -0.79669470                             | O 2.65826694  | 2.46649175    |
| 1.39528622        |             |    | -1.34215448                             | C 1.38398442  | 1.06041931    |
| -1.41155443       |             | H  | 1.65319544                              | O 1.66826163  | 1.42437688    |
| -2.31794244       | -2.30541036 |    | 2.72862685                              | C -2.35166244 | 1.50984118    |
| 2.66305323        |             |    | 0.89351490                              | C -3.66953530 | 2.05259428    |
| -0.18648338       |             | Mn | 0.36427048                              | C -2.08203716 | 1.95870946    |
| 0.64965229        | 0.09321618  |    | 2.32020434                              | H -2.41161445 | 0.41048642    |
| 2.05480088        |             |    | 0.89635903                              | H -3.93442559 | 1.64418038    |
| -0.77140783       |             | O  | -0.62130695                             | H -4.49068254 | 1.78214763    |
| 2.78210093        | -1.29399743 |    | 1.04568639                              | H -3.66968811 | 3.15139619    |
| 1.71104912        |             |    | 0.28791039                              | H -1.12312329 | 1.58296113    |
| 1.68880842        |             | O  | 2.70543178                              | H -2.07646512 | 3.05623318    |
| 1.45597560        | 2.76475382  |    | 2.41143909                              | H -2.87384883 | 1.58916087    |
| -2.13635166       |             |    | 2.98978783                              | C -0.73773195 | 3.64479122    |
| 1.29053208        |             | C  | -0.30287186                             | C -0.33074549 | 4.16123708    |
| 1.68359141        | 1.02691887  |    | -1.67480460                             | C 0.22753403  | 4.13367190    |
| -1.73934038       |             |    | 0.77070702                              | H -1.74736464 | 4.03294517    |
| 2.75117794        |             | H  | -0.07197015                             | H -1.06084117 | 3.92127277    |
| 0.05818791        | 1.03841354  |    | -2.45975255                             | H -0.23800663 | 5.25750901    |
| -3.86494545       |             |    | -1.65191487                             | H 0.64776050  | 3.76818690    |

|             |             |   |             |             |             |            |             |
|-------------|-------------|---|-------------|-------------|-------------|------------|-------------|
| -0.00889693 |             | H | -4.26630993 | -1.98515286 | H           | 0.00535164 | 3.73074364  |
| 1.18810151  | 1.67890041  |   | H           | 1.76811265  | H           | 1.26180606 | 3.84588574  |
| -3.59921393 |             |   | 2.76152385  | 0.53352799  | H           | 0.20037706 | 5.23151215  |
| 1.24036146  |             | H | -0.72767682 | 0.84160240  | C           | 2.64882484 | -2.48445128 |
| 0.87276227  | 2.93622026  |   | H           | 1.25536105  | C           | 3.30316396 | -1.96955177 |
| -1.76960994 |             |   | 2.30721040  | 2.52903772  | C           | 3.30659762 | -3.76750782 |
| 3.09437312  |             | H | -2.43733206 | 0.77005352  |             | H          | 1.59711436  |
| 0.69902243  | 3.39155388  |   | C           | -2.71277101 | 1.49844927  | H          | 2.86205479  |
| -0.85942116 |             |   | 3.60356500  | -1.02664361 | 2.88151095  | H          | 3.19295852  |
| 0.28119591  |             | C | -0.54039562 | -2.70731227 | 3.33771238  | H          | 4.38385848  |
| 4.30211521  | -1.03255650 |   | C           | -1.81007959 | 2.39567463  | H          | 2.77786784  |
| 0.10665017  |             |   | 4.05568515  | -4.22770243 | -0.07572596 | H          | 4.35151594  |
| 1.36945746  |             | H | -1.89042204 | -3.60799286 | 0.46171853  | H          | 3.32965149  |
| 3.86919220  | 0.58077944  |   | H           | -4.51460647 | 1.57797115  | C          | 4.31181278  |
| -1.27928402 |             |   | 4.10280872  | -0.72375991 | -0.35142710 | C          | 4.75545409  |
| -1.82085048 |             | H | -0.51847200 | 0.41507413  | 0.56104695  | C          | 4.61463664  |
| 5.39271273  | -0.88629480 |   | H           | -0.39159440 | -1.80495555 | H          | 4.87999763  |
| 0.45072799  |             |   | 4.01360577  | -1.63384091 | -0.08194297 | H          | 4.47547827  |
| -1.41263639 |             | H | -0.03367761 | 0.26891827  | 1.61213449  | H          | 5.84935042  |
| 3.52736325  | 2.32241240  |   | H           | 0.52887181  | 0.52264165  | H          | 4.31908637  |
| 1.14793411  |             |   | 3.87927355  | 1.37144565  | 0.24359869  | H          | 4.39353949  |
| 1.06082494  |             | H | -0.00391480 | -1.21953053 | -2.49300864 | H          | 4.06012143  |
| 5.13322087  | 1.56447469  |   | C           | 0.49602885  | -2.14245215 | H          | 5.68329295  |
| 2.74477901  |             |   | -2.41558870 | -0.15682041 | -1.92200584 | H          | -0.18131120 |
| 1.00763553  |             | C | 3.23927692  | -0.68018378 | 0.74952014  | C          | -5.88081068 |
| -1.99852186 | 2.38340233  |   | C           | -1.48430599 | -0.21480574 | C          | -5.15506754 |
| 3.49291178  |             |   | -3.63495437 | -1.59211373 | 0.96065460  | C          | -3.75704798 |
| 0.49214777  |             | H | 1.67329913  | -1.74736097 | 0.94046864  | C          | -3.06174098 |
| -2.67045851 | 1.10255258  |   | H           | -1.80594713 | -0.31431006 | C          | -3.83459417 |
| 2.72362666  |             |   | -1.10524640 | -1.70491097 | -1.50029315 | C          | -5.20706997 |
| 2.76127040  |             | H | 3.08213796  | -1.54366814 | -1.44867985 | H          | -3.46131411 |
| -2.80842480 | 3.11190346  |   | H           | -1.86329800 | 3.10119046  | H          | -6.96518675 |
| 4.31976306  |             |   | -1.78854956 | -1.36029709 | -0.18610627 | H          | -5.66282306 |
| 2.37746642  |             | H | 3.11764575  | -1.55118464 | 1.92951151  | C          | -2.96246353 |
| -3.99555869 | -0.47606580 |   | H           | -1.85441903 | 2.12693945  | H          | -3.30868386 |
| 4.57024341  |             |   | -3.44029348 | -1.76400835 | -2.45764686 | H          | -5.77607006 |
| 0.37759713  |             | H | 3.40303824  | -1.46626436 | -2.37900585 | C          | -0.97301155 |
| -4.47095622 | 1.20301921  |   | C           | -1.93584209 | 0.72989910  | C          | -1.61043754 |
| 4.46235872  |             |   | -0.57128037 | -1.94961728 | 2.03746512  | H          | -0.03982437 |
| -0.49856073 |             | C | 4.93153749  | -2.51194411 | 0.66419354  | H          | -0.98176829 |
| 0.47431486  | 0.50705229  |   | C           | -2.01492673 | 2.93000214  | N          | -1.72137577 |
| 4.70931574  |             |   | -0.08592847 | -1.99094455 | -0.40324611 | H          | -0.48958680 |
| -1.91929253 |             | H | 5.03538258  | -1.07966676 | -1.47653758 |            |             |
| -1.50436706 | -0.34229804 |   | H           |             |             |            |             |
| 4.70841669  |             |   | 0.20784158  |             |             |            |             |
| 1.54893998  |             | H | 6.01852602  |             |             |            |             |
| 0.62782889  | 0.42727734  |   | H           |             |             |            |             |
| 4.44692519  |             |   | 1.44291101  |             |             |            |             |
| 0.31729062  |             | H | 4.47225929  |             |             |            |             |
| -0.84072124 | -2.68252920 |   | H           |             |             |            |             |
| 4.12787417  |             |   | 0.82179855  |             |             |            |             |
| -2.14019182 |             | H | 5.76922881  |             |             |            |             |
| 0.17928742  | -2.05190278 |   | H           |             |             |            |             |
| 0.33617127  |             |   | -0.53007312 |             |             |            |             |
| 0.88033701  |             | C | -5.95204297 |             |             |            |             |
| -1.24989828 | -0.97322303 |   | C           |             |             |            |             |
| -5.46502085 |             |   | -1.64180435 |             |             |            |             |

|                                |             |             |             |    |             |
|--------------------------------|-------------|-------------|-------------|----|-------------|
| 0.25404205                     |             | C           | -4.09949847 |    |             |
| -1.98453189                    | 0.41166785  |             |             | C  |             |
| -3.22589958                    |             |             | -1.91882041 |    |             |
| -0.72181354                    |             | C           | -3.76076428 |    |             |
| -1.52097032                    | -1.97288991 |             |             | C  |             |
| -5.09288400                    |             |             | -1.19203879 |    |             |
| -2.09379813                    |             | H           | -4.17381016 |    |             |
| -2.44262627                    | 2.53499483  |             |             | H  |             |
| -7.00560130                    |             |             | -0.98536420 |    |             |
| -1.08531066                    |             | H           | -6.12427512 |    |             |
| -1.69145012                    | 1.12501160  |             |             | C  |             |
| -3.53654488                    |             |             | -2.38696081 |    |             |
| 1.64766322                     |             | H           | -3.08268912 |    |             |
| -1.48487504                    | -2.82907986 |             |             | H  |             |
| -5.49230679                    |             |             | -0.88599743 |    |             |
| -3.06339480                    |             | C           | -1.42188397 |    |             |
| -2.58683556                    | 0.53447608  |             |             | C  |             |
| -2.19911131                    |             |             | -2.69572757 |    |             |
| 1.71126774                     |             | H           | -0.35106159 |    |             |
| -2.81436909                    | 0.57740353  |             |             | H  |             |
| -1.72727453                    |             |             | -3.00260009 |    |             |
| 2.64616995                     |             | N           | -1.89904975 |    |             |
| -2.21330853                    | -0.63434683 |             |             | H  |             |
| -0.35917039                    | -0.91927691 | -1.40607453 |             |    |             |
| <b>Mn-5-H_1a-H<sub>H</sub></b> |             |             |             |    |             |
| P                              | -0.93467099 |             | 1.76932331  |    |             |
| 0.05691967                     | C           | -1.56095847 | 1.45727286  |    |             |
| -1.65798549                    | C           | -0.42489509 | 0.93199658  |    |             |
| -2.51149875                    | H           | -2.04847259 | 2.33130092  |    |             |
| -2.11290586                    | H           | -2.33514640 | 0.67720710  |    |             |
| -1.56957127                    | H           | -0.80821896 | 0.56664434  |    |             |
| -3.48392275                    | H           | 0.31010853  | 1.72397611  |    |             |
| -2.73953401                    |             | N           | 0.25983021  |    |             |
| -0.14896953                    | -1.78904003 | C           | 1.29233005  |    |             |
| -0.80264024                    | -2.60067143 | C           | 1.99450395  |    |             |
| -1.86765649                    | -1.78126102 | H           | 2.00605255  |    |             |
| -0.03329922                    | -2.94198945 | H           | 0.84777967  |    |             |
| -1.24434315                    | -3.51276941 | H           | 1.27160384  |    |             |
| -2.66367699                    | -1.53069773 | H           | 2.80899311  |    |             |
| -2.34901959                    | -2.34442137 | P           | 2.54147555  |    |             |
| -1.12492287                    | -0.17428692 | Mn          | 0.94631642  |    |             |
| 0.47406398                     | 0.14624340  | C           | 1.95703969  |    |             |
| 1.77401663                     | -0.46820398 | O           | 2.62118108  |    |             |
| 2.64981142                     | -0.88113877 | C           | 1.34901369  |    |             |
| 0.80410754                     | 1.84260299  |             |             | O  |             |
| 1.62637111                     |             |             | 1.02364049  |    |             |
| 2.95708031                     | C           | -2.40193412 | 1.30809153  |    |             |
| 1.09837777                     | C           | -3.72124022 | 1.89753062  |    |             |
| 0.62515724                     | C           | -2.16286647 | 1.55586553  |    |             |
| 2.57869570                     | H           | -2.44650545 | 0.21908959  |    |             |
| 0.94358108                     | H           | -3.96415227 | 1.62098928  |    |             |
| -0.41036420                    | H           | -4.54546239 | 1.51944938  |    |             |
| 1.24868659                     | H           | -3.74170402 | 2.99631438  |    |             |
| 0.70015551                     | H           | -1.20012206 | 1.15261873  |    |             |
| 2.92502317                     | H           | -2.18761606 | 2.62901152  |    |             |
| 2.82512178                     | H           | -2.95321245 | 1.07404297  |    |             |
| 3.17389855                     | C           | -0.79651829 | 3.62028745  |    |             |
| <b>Mn-5-H_1a-H<sub>N</sub></b> |             |             |             |    |             |
| P                              |             |             | 2.41028792  |    | -0.56250848 |
| 0.47044809                     |             |             |             | C  | 2.27594970  |
| -0.63401960                    | 2.32623867  |             |             |    | C           |
| 1.31435724                     |             |             |             |    | 0.43693644  |
| 2.80813226                     |             |             |             | H  | 3.25024863  |
| -0.53145347                    | 2.82412617  |             |             |    | H           |
| 1.91157544                     |             |             |             |    | -1.63324659 |
| 2.60577564                     |             |             |             | H  | 1.07782259  |
| 0.29627771                     | 3.88015593  |             |             |    | H           |
| 1.77702613                     |             |             |             |    | 1.43482605  |
| 2.72286067                     |             |             |             | N  | 0.08316557  |
| 0.45512278                     | 2.00315522  |             |             |    | C           |
| -0.86298680                    |             |             |             |    | 1.48550792  |
| 2.44454415                     |             |             |             | H  | -0.35469264 |
| 2.46308097                     | 2.38674203  |             |             |    | H           |
| -1.13779783                    |             |             |             |    | 1.33599079  |
| 3.50605254                     |             |             |             | Mn | 0.52246063  |
| 0.57593225                     | -0.14547725 |             |             |    | C           |
| 1.31920825                     |             |             |             |    | 2.10830053  |
| 0.18024437                     |             |             |             | O  | 1.86756417  |
| 3.12745455                     | 0.38602053  |             |             |    | C           |
| 0.93455374                     |             |             |             |    | 0.80648891  |
| -1.85233554                    |             |             |             | O  | 1.22728535  |
| 1.03636541                     | -2.95969087 |             |             |    | C           |
| 2.59558960                     |             |             |             |    | -2.34415517 |
| -0.03129211                    |             |             |             | C  | 3.57030633  |
| -3.14476355                    | 0.81645496  |             |             |    | C           |
| 2.92881142                     |             |             |             |    | -2.44256857 |
| -1.51312258                    |             |             |             | H  | 1.57397200  |
| -2.73793205                    | 0.11336422  |             |             |    | H           |
| 3.29776469                     |             |             |             |    | -3.16740533 |
| 1.88071572                     |             |             |             | H  | 3.60212362  |

|             |               |             |              |             |             |             |
|-------------|---------------|-------------|--------------|-------------|-------------|-------------|
| 0.26767906  | C             | -0.38018756 | 4.34633159   | -4.19066748 | 0.47566021  | H           |
| -1.00282127 | C             | 0.14580999  | 3.94983407   | 4.59983196  |             | -2.75951110 |
| 1.41934759  | H             | -1.81488033 | 3.95520162   | 0.74442318  | H           | 2.27412252  |
| 0.53975379  | H             | -1.09781213 | 4.22159405   | -1.81103414 | -2.13150475 | H           |
| -1.82491883 | H             | -0.30352199 | 5.42679318   | 3.97098247  |             | -2.14976749 |
| -0.80949149 | H             | 0.60706709  | 4.01811532   | -1.71642298 | H           | 2.81443310  |
| -1.35732950 | H             | -0.08498872 | 3.39593421   | -3.47810988 | -1.86596476 | C           |
| 2.33928101  |               |             | H 1.18825097 | 4.10569406  |             | 0.16136405  |
| 3.71742608  | 1.15837200    |             | H            | 0.12608682  | C           | 4.58499706  |
| 0.09986250  |               |             | 5.02309293   | 1.15394783  | 1.17602396  | C           |
| 1.65756306  |               | C           | 2.69994825   | 4.14393562  |             | 0.79641510  |
| -2.62210976 | 0.93657040    | C           | 3.34675657   | -1.25869392 | H           | 4.79500766  |
| -2.28432383 | 2.27168446    | C           | 3.37785046   | -0.70381114 | 0.13258464  | H           |
| -3.81162636 | 0.27310052    | H           | 1.65126987   | 4.73384230  |             | 0.70403801  |
| -2.90020956 | 1.13848517    | H           | 2.89447085   | 2.16649437  | H           | 5.55609064  |
| -1.40662552 | 2.75421526    | H           | 3.24402926   | 1.57372924  | 0.87383307  | H           |
| -3.13049060 | 2.96701258    | H           | 4.42573027   | 3.89590400  |             | 2.00387781  |
| -2.09547740 | 2.16547272    | H           | 2.85532420   | 1.28309158  | H           | 3.75374044  |
| -4.15449135 | -0.63008317   | H           | 4.42032321   | 0.14307631  | -2.04950288 | H           |
| -3.59418161 | -0.00678958   | H           | 3.41177495   | 3.55412793  |             | 1.72391245  |
| -4.66545766 | 0.96656290    | C           | 4.32659586   | -1.28776979 | H           | 5.17754318  |
| -0.62107382 | -0.41472766   | C           | 4.76368956   | 1.06132347  | -1.52751585 | C           |
| 0.37449757  | 0.65470924    | C           | 4.61072750   | -2.08569148 |             | 1.45159265  |
| -0.07396047 | -1.80563690   | H           | 4.90872038   | 1.55419000  | H           | -0.38903942 |
| -1.55304849 | -0.28761629   | H           | 4.50115139   | -0.45093981 | 2.10936635  | C           |
| 0.06547976  | 1.67444835    |             | H            | -1.53719940 |             | -3.13950454 |
| 5.85505981  |               |             | 0.51086486   | 2.54664294  | C           | -0.78351379 |
| 0.62213565  |               | H           | 4.31015147   | -2.41332765 | 1.62490173  | C           |
| 1.36084673  | 0.49045893    |             | H            | -1.22072069 |             | -2.14900039 |
| 4.39026464  |               |             | -0.79408710  | 0.29717019  | C           | -2.45417247 |
| -2.60588920 | H 4.04428535  |             | 0.84741852   | -2.80532215 | -0.07562980 | C           |
| -2.00404662 | H 5.67579876  |             | 0.18696186   | -3.19896169 |             | -3.51136833 |
| -1.89573796 | H -0.25832212 |             | -0.89717089  | 0.87071468  | C           | -2.77548381 |
| 0.68832147  |               | C           | -5.81975741  | -3.67094385 | 2.19255044  | H           |
| -1.62391604 | -0.61868820   | C           | -5.13231857  | -1.12888252 |             | -3.31645000 |
| -1.86345790 | 0.56402061    |             | C            | 3.54663590  | H           | 0.23303690  |
| -3.73201511 |               |             | -1.94707806  | -2.12542864 | 1.88648191  | C           |
| 0.59165316  |               | C           | -2.97301541  | -2.88613292 |             | -2.68966290 |
| -1.79498016 | -0.62136368   | C           | -3.70788364  | -1.45221384 | H           | -4.14274680 |
| -1.56358610 | -1.81726212   | C           | -5.08938189  | -3.96130448 | 0.54402809  | H           |
| -1.47754879 | -1.81066969   | H           | -3.52937442  | -3.37553434 |             | -4.23339399 |
| -2.37135345 | 2.72713450    |             | H            | 2.90993873  | C           | -2.05373128 |
| -6.90938832 | -1.55775200   | -0.62522497 | H            | -2.16318963 | -2.36513865 | C           |
| -5.67992199 |               |             | -1.98654284  | -0.68545947 |             | -1.70229164 |
| 1.50439314  |               | C           | -2.98444862  | -1.96751415 | H           | -2.34231027 |
| -2.18810829 | 1.79510925    |             | H            | -2.08011539 | -3.41801030 | H           |
| -3.14405596 | -1.46237347   | -2.74982927 | H            | -0.40494471 |             | -0.85474283 |
| -5.61948236 | -1.29674562   | -2.75012582 | C            | -2.60826041 | N           | -0.52961547 |
| -0.90155181 |               |             | -1.94910242  | -1.34178083 | -0.55825932 | P           |
| 0.51711126  |               | C           | -1.63158128  | -1.55356917 |             | 1.59869763  |
| -2.19316643 | 1.77771839    |             | H            | -0.21233246 | H           | -2.58092097 |
| -0.02878405 |               |             | -2.62324492  | 0.46804443  | 1.64702136  | H           |
| 0.41937297  |               | H           | -1.05176760  | -2.82868921 |             | 2.20784476  |
| -2.36027916 | 2.69089696    |             | N            | 1.84975729  | C           | -3.00283143 |
| -1.62820469 | -1.89182035   | -0.67026908 | H            | 0.86604260  | -1.10822037 | H           |
| -0.48116634 | -0.87141612   | -1.56285838 |              | -2.89013322 |             | -0.20644781 |
|             |               |             |              | -0.88210281 | C           | -1.67736548 |



|                                         |             |             |             |  |             |             |             |
|-----------------------------------------|-------------|-------------|-------------|--|-------------|-------------|-------------|
|                                         |             |             | 3.41880798  |  | -0.63179753 |             | H           |
|                                         |             |             | -2.74019584 |  |             | 3.57469513  |             |
|                                         |             |             | -0.89578005 |  | C           | -0.82639464 |             |
|                                         |             |             | 3.74155137  |  | -1.85459743 |             | H           |
|                                         |             |             | -1.03061955 |  |             | 4.76448852  |             |
|                                         |             |             | -2.20503502 |  | H           | 0.24629162  |             |
|                                         |             |             | 3.68736905  |  | -1.62109076 |             | H           |
|                                         |             |             | -1.00573424 |  |             | 3.06193691  |             |
|                                         |             |             | -2.69814069 |  | C           | -1.34193175 |             |
|                                         |             |             | 4.35169223  |  | 0.52231560  |             | H           |
|                                         |             |             | -0.29138213 |  |             | 4.25870143  |             |
|                                         |             |             | 0.83217962  |  | H           | -1.48513535 |             |
|                                         |             |             | 5.39780308  |  | 0.21211042  |             | H           |
|                                         |             |             | -1.97795771 |  |             | 4.19357841  |             |
|                                         |             |             | 1.40458028  |  | C           | -4.35875100 |             |
|                                         |             |             | 1.32927507  |  | -0.59922705 |             | H           |
|                                         |             |             | -4.51587440 |  |             | 2.41137051  |             |
|                                         |             |             | -0.73498550 |  | H           | -5.16062329 |             |
|                                         |             |             | 0.82367644  |  | -1.15856277 |             | H           |
|                                         |             |             | -4.52067832 |  |             | 1.09769362  |             |
|                                         |             |             | 0.46218005  |  | C           | -2.88223782 |             |
|                                         |             |             | 1.04580484  |  | -2.61332739 |             | H           |
|                                         |             |             | -3.61208001 |  |             | 0.40732056  |             |
|                                         |             |             | -3.13315531 |  | H           | -3.08912569 |             |
|                                         |             |             | 2.08412934  |  | -2.91830633 |             | H           |
|                                         |             |             | -1.88474493 |  |             | 0.77866705  |             |
|                                         |             |             | -2.99259565 |  | H           | -3.88481652 |             |
|                                         |             |             | -3.04643623 |  | -1.72492838 |             | H           |
|                                         |             |             | 0.05010524  |  | -2.49680358 |             | -2.25738492 |
| <b>TSB-1a-H<sub>N</sub><sup>+</sup></b> |             |             |             |  |             |             |             |
| P                                       |             | 2.65169820  |             |  | -0.55377182 |             |             |
| 0.35403503                              | C           | 2.42629685  |             |  | -0.94748033 |             |             |
| 2.14422600                              | C           | 1.48125915  |             |  | 0.06215584  |             |             |
| 2.76909418                              | H           | 3.38452523  |             |  | -1.00119917 |             |             |
| 2.68639360                              | H           | 1.98044714  |             |  | -1.95610397 |             |             |
| 2.18440685                              | H           | 1.14750549  |             |  | -0.30949607 |             |             |
| 3.76146036                              | H           | 2.01628493  |             |  | 1.00732270  |             |             |
| 2.98797062                              | N           | 0.33705777  |             |  | 0.31550516  |             |             |
| 1.91114716                              | C           | -0.50786767 |             |  | 1.33031560  |             |             |
| 2.52636721                              | H           | 0.08103670  |             |  | 2.26595686  |             |             |
| 2.64170646                              | H           | -0.77733490 |             |  | 1.03711734  |             |             |
| 3.56427524                              | Mn          | 0.52631626  |             |  | 0.34381548  |             |             |
| -0.20525995                             | C           | 1.35187649  |             |  | 1.78765615  |             |             |
| -0.72919466                             | O           | 1.88838542  |             |  | 2.72842871  |             |             |
| -1.18334846                             | C           | 0.43762893  |             |  | -0.12202177 |             |             |
| -1.92318360                             | O           | 0.41137049  |             |  | -0.39606536 |             |             |
| -3.05726580                             | C           | 3.42039256  |             |  | -2.14805416 |             |             |
| -0.29902443                             | C           | 4.85775053  |             |  | -2.39872657 |             |             |
| 0.13292458                              | C           | 3.24236045  |             |  | -2.30332947 |             |             |
| -1.80337353                             | H           | 2.80741543  |             |  | -2.92239926 |             |             |
| 0.19290552                              | H           | 5.00200448  |             |  | -2.29417516 |             |             |
| 1.21811781                              | H           | 5.15353873  |             |  | -3.42511081 |             |             |
| -0.13219985                             | H           | 5.57155934  |             |  | -1.72835706 |             |             |
| -0.36747346                             | H           | 2.19434139  |             |  | -2.20452404 |             |             |
| -2.11704654                             | H           | 3.80956432  |             |  | -1.55241257 |             |             |
| -2.37136806                             | H           | 3.59742383  |             |  | -3.29114043 |             |             |
| -2.13368532                             | C           | 4.13129358  |             |  | 0.59537932  |             |             |
| <b>Mn-5'-2a<sub>N</sub></b>             |             |             |             |  |             |             |             |
| P                                       |             | 2.66001092  |             |  |             |             | -0.72162236 |
| 0.06831397                              |             |             |             |  |             | C           | 2.46756748  |
| -1.45075637                             | 1.75027444  |             |             |  | C           | 1.60675453  |             |
| -0.52066611                             | 2.58315107  |             |             |  | H           | 3.43093393  |             |
| -1.67876591                             | 2.23450186  |             |             |  | H           | 1.94225673  |             |
| -2.40973463                             | 1.60524537  |             |             |  | H           | 1.11244110  |             |
| -1.10255971                             | 3.39121685  |             |             |  | H           | 2.23842953  |             |
| 0.21012076                              | 3.13331984  |             |             |  |             | N           |             |
| 0.61226747                              |             |             |             |  |             |             | 0.16676600  |
| 1.77328041                              | C           | -0.41569828 |             |  |             |             | 0.69408984  |
| 2.65663978                              |             |             |             |  | H           |             | 0.00537725  |
| 1.47936724                              | 3.32276085  |             |             |  |             |             | H           |
| -0.75021478                             |             |             |             |  |             |             | -0.09958333 |
| 3.36157604                              | Mn          | 0.77476542  |             |  |             |             | 0.52328825  |
| -0.11353241                             | C           | 1.53040926  |             |  |             |             | 1.71338532  |
| -1.17404385                             | O           | 2.05641738  |             |  |             |             | 2.53007481  |
| -1.83269514                             |             |             |             |  | C           |             | 0.12152335  |
| -0.34420436                             | -1.50240331 |             |             |  | O           |             | -0.32933810 |
| -0.95070977                             | -2.39816061 |             |             |  | C           |             | 2.91965685  |
| -2.22908697                             | -0.99430206 |             |             |  | C           |             | 4.09145338  |
| -3.09212393                             | -0.55297673 |             |             |  | C           |             | 2.95656773  |
| -1.94093138                             | -2.48959323 |             |             |  | H           |             | 1.97830719  |
| -2.77506936                             | -0.79058792 |             |             |  | H           |             | 4.04697719  |
| -3.36169336                             | 0.51222430  |             |             |  | H           |             | 4.12031588  |
| -4.03248956                             | -1.12448233 |             |             |  | H           |             | 5.05459526  |
| -2.58778504                             | -0.72730178 |             |             |  | H           |             | 2.19858619  |
| -1.21146272                             | -2.80057290 |             |             |  | H           |             | 3.93493759  |

|             |   |             |             |             |               |             |             |
|-------------|---|-------------|-------------|-------------|---------------|-------------|-------------|
| 0.37283014  | C | 3.94577767  | 1.82676320  | -1.56270162 | -2.81455320   | H           | 2.77035769  |
| 1.25000402  | C | 4.60701329  | 0.93886332  | -2.86452648 | -3.05752377   | C           | 4.31976072  |
| -1.03242830 | H | 4.91985854  | -0.01005736 | 0.12934986  | 0.18411691    | C           | 4.20290258  |
| 0.85313539  | H | 3.89190387  | 1.56584941  | 1.35038367  | 1.08682135    | C           | 4.90425173  |
| 2.31522813  | H | 4.80979173  | 2.49781737  | 0.50801732  | -1.16826683   | H           | 4.99279566  |
| 1.13185354  | H | 3.05174026  | 2.41303353  | -0.60243566 | 0.66960749    | H           | 3.80553164  |
| 1.00049144  | H | 4.90541509  | 0.04748386  | 1.10963688  | 2.08261173    |             | H           |
| -1.60042981 | H | 3.84733456  | 1.46979029  | 5.18875214  |               |             | 1.81704160  |
| -1.61929657 | H | 5.48959752  | 1.59404479  | 1.23320517  |               | H           | 3.54394064  |
| -0.98131341 | C | -1.77578263 | 1.62410471  | 2.11078194  | 0.64178432    |             | H           |
| 1.74307265  | H | -0.15407808 | -0.83370868 | 5.20961677  |               |             | -0.36670344 |
| 1.47804875  | C | -4.00358567 | -1.63403643 | -1.75634311 | H 4.19819488  |             | 1.09429956  |
| 2.15410305  | C | -2.62496258 | -1.49868599 | -1.77410721 | H 5.80213886  |             | 1.12951302  |
| 1.99907313  | C | -1.98370479 | -1.88707339 | -1.03134142 | C -1.61307725 |             | 1.22923730  |
| 0.80897490  | C | -2.76946318 | -2.52142765 | 1.89532533  |               | H           | -2.86342706 |
| -0.19936039 | C | -4.15291457 | -2.63945154 | -2.01058347 | 2.83266570    |             | C           |
| -0.02623244 | C | -4.78013507 | -2.18596770 | -5.07942489 | -1.02706364   | -0.30111419 | C           |
| 1.13330629  | H | -4.47306127 | -1.32037120 | -4.38086371 |               |             | -1.31979341 |
| 3.09030424  | H | -2.01865778 | -1.09205609 | 0.86925681  |               | C           | -3.15336635 |
| 2.81270228  | C | -2.08063133 | -2.98081653 | -2.00016816 | 0.81456892    |             | C           |
| -1.39109896 | H | -4.74191566 | -3.10370403 | -2.62917627 | -2.37579416   | -0.44983789 | C           |
| -0.82339195 | H | -5.86029557 | -2.29097105 | -3.34329735 | -2.05599092   | -1.60763633 | C           |
| 1.25424410  | C | -0.74201624 | -3.09732482 | -4.56652865 | -1.38659329   | -1.54782185 | H           |
| -1.37291598 | C | -0.00258465 | -2.76712506 | -6.03618022 | -0.50268759   | -0.23168433 | H           |
| -0.11073195 | H | -0.18629300 | -3.45136751 | -4.78924271 |               |             | -1.03060648 |
| -2.24602449 | H | 1.02428877  | -2.49310507 | 1.84263576  |               | C           | -1.37257305 |
| -0.35718964 | N | -0.62470898 | -1.66240841 | -3.10334841 | -0.46437040   | H           | -2.91362568 |
| 0.60691902  | P | -1.44474825 | 1.55335734  | -2.33808235 | -2.57253491   | H           | -5.11222992 |
| -0.07357147 | H | -2.55178592 | 0.87501002  | -1.14894428 | -2.46298528   | C           | -0.69806972 |
| 1.95138739  | H | -2.20321204 | 2.59617828  | -3.37629822 | 0.66403850    |             | C           |
| 2.03456067  | C | -3.06174720 | 0.89675544  | -1.16253379 |               |             | -2.94750452 |
| -0.74714169 | H | -3.25125842 | 0.04942415  | 2.01425729  |               | H           | 0.23917722  |
| -0.07012077 | C | -1.48244654 | 3.36397231  | -3.93921257 | 0.62940935    |             | H           |
| -0.53912917 | H | -2.51807327 | 3.66458267  | -0.40846203 |               |             | -2.26577846 |
| -0.29897113 | C | -1.26379302 | 3.57888335  | 2.46365466  |               | N           | -2.45901242 |
| -2.02913342 | H | -1.31792162 | 4.65016614  | -2.30897036 | 1.95598071    | P           | -1.06143186 |
| -2.27507516 | H | -0.27948783 | 3.22162243  | 1.80398951  | 0.23661118    |             | H           |
| -2.36135339 | H | -2.02455696 | 3.07025193  | -2.32740965 |               |             | 0.41513024  |
| -2.63708454 | C | -0.57070300 | 4.23055012  | 1.69560374  | H -2.15442173 |             | 2.00623861  |
| 0.31891048  | H | 0.49354764  | 4.01493899  | 2.45855628  | C -2.59135694 |             | 1.59002368  |
| 0.16864285  | H | -0.71941254 | 5.29001797  | -0.79136254 | H -2.76884060 |             | 0.50746584  |
| 0.06077261  | H | -0.78728466 | 4.13396579  | -0.64802628 | C -0.83032507 |             | 3.63925071  |
| 1.39203784  | C | -4.23899175 | 1.84919835  | 0.49572546  | H -1.71966639 |             | 3.96590143  |
| -0.60897245 | H | -4.18991911 | 2.68500500  | 1.06735521  | C -0.76741962 |             | 4.43215119  |
| -1.32382786 | H | -5.17818401 | 1.31215217  | -0.80050300 | H -0.51294402 |             | 5.48228712  |
| -0.81272299 | H | -4.32761249 | 2.27509089  | -0.59090496 | H 0.00269638  |             | 4.04534884  |
| 0.40199580  | C | -2.93933732 | 0.32622034  | -1.48369603 | H -1.72460910 |             | 4.43595767  |
| -2.15047964 | H | -3.88307065 | -0.16046208 | -1.33777621 | C 0.40896426  |             | 3.88208718  |
| -2.44229700 | H | -2.72285164 | 1.09379298  | 1.34698619  |               | H           | 1.32296975  |
| -2.90868524 | H | -2.14751342 | -0.43093667 | 3.60440664  | 0.80110841    |             | H           |
| -2.21540839 | H | 0.06215889  | -3.68238872 | 0.49555086  |               |             | 4.94737072  |
| 0.52768301  | H | -2.66665593 | -3.23328910 | 1.60978832  |               | H           | 0.40168073  |
| -2.27991322 |   |             |             | 3.31199696  | 2.28685243    |             | C           |
|             |   |             |             | -3.79888367 |               |             | 2.34473545  |
|             |   |             |             | -0.25954558 | H -3.67651044 |             | 3.43562623  |
|             |   |             |             | -0.35237340 | H -4.70072392 |             | 2.07378760  |
|             |   |             |             | -0.83031027 | H -4.00812692 |             | 2.11839118  |

|                                         |             |   |             |                                       |             |             |             |
|-----------------------------------------|-------------|---|-------------|---------------------------------------|-------------|-------------|-------------|
|                                         |             |   |             | 0.79645771                            | C           | -2.38460874 | 1.81675388  |
|                                         |             |   |             | -2.28257134                           | H           | -3.20217549 | 1.34379354  |
|                                         |             |   |             | -2.84736198                           | H           | -2.38721837 | 2.88295452  |
|                                         |             |   |             | -2.54805843                           | H           | -1.44537840 | 1.38526160  |
|                                         |             |   |             | -2.65151961                           | H           | -0.97769922 | -3.42284325 |
|                                         |             |   |             | -1.43209997                           | H           | -1.19800415 | -3.82245743 |
|                                         |             |   |             | 2.69574320                            |             |             |             |
| <b>TSB-1a-H<sub>H</sub><sup>+</sup></b> |             |   |             | <b>Mn-5'<sub>2a<sub>H</sub></sub></b> |             |             |             |
| P                                       | -0.75213722 |   | 1.89267943  | P                                     | -0.87766124 |             | 1.81975997  |
| -0.26818685                             |             | C | -1.55785744 | -0.07541423                           |             | C           | -1.61629741 |
| 1.26321505                              | -1.80822492 |   | C           | 1.29925571                            | -1.68369323 |             | C           |
| -0.59414569                             |             |   | 0.33420817  | -0.53939220                           |             |             | 0.61523507  |
| -2.51887727                             |             | H | -1.92623974 | -2.50326442                           |             | H           | -2.10907702 |
| 2.06300307                              | -2.46609882 |   | H           | 2.12040966                            | -2.22464900 |             | H           |
| -2.44383062                             |             |   | 0.69152624  | -2.40625280                           |             |             | 0.57156618  |
| -1.48860127                             |             | H | -1.13549039 | -1.43764473                           |             | H           | -1.01599730 |
| -0.24696515                             | -3.29305069 |   | H           | -0.00271358                           | -3.29427097 |             | H           |
| 0.18049815                              |             |   | 0.90846515  | 0.06402354                            |             |             | 1.36616798  |
| -3.06455439                             |             | N | 0.04032858  | -3.06039948                           |             | N           | 0.30914324  |
| -0.56419760                             | -1.55210284 |   | C           | -0.20824739                           | -1.65274377 |             | C           |
| 0.83777392                              |             |   | -1.57712666 | 1.10798748                            |             |             | -1.09954359 |
| -2.24278865                             |             | C | 1.53962256  | -2.47753339                           |             | C           | 1.91478958  |
| -2.46933106                             | -1.23706612 |   | H           | -2.04700811                           | -1.61248224 |             | H           |
| 1.57337917                              |             |   | -1.08926418 | 1.78236851                            |             |             | -0.52907842 |
| -2.91153628                             |             | H | 0.19116637  | -3.15430614                           |             | H           | 0.45533908  |
| -2.19019540                             | -2.90369576 |   | H           | -1.68416649                           | -3.16187946 |             | H           |
| 0.78465756                              |             |   | -3.06382223 | 1.24010669                            |             |             | -2.79960149 |
| -0.69400925                             |             | H | 2.22167771  | -1.16772181                           |             | H           | 2.67809151  |
| -3.18754441                             | -1.71831466 | P | 2.36370847  | -2.60115665                           | -2.18132259 |             | P           |
| -1.39906858                             | 0.02447650  |   | Mn          | 2.60280601                            |             |             | -1.08736997 |
| 0.97874872                              |             |   | 0.42214355  | -0.19463871                           |             | Mn          | 1.03766357  |
| 0.03308733                              |             | C | 2.04603055  | 0.56918972                            | 0.00963647  |             | C           |
| 1.39120249                              | -0.95524832 |   | O           | 2.05876273                            |             |             | 1.84890834  |
| 2.74070654                              |             |   | 2.04125317  | -0.57457199                           |             | O           | 2.72381085  |
| -1.64210147                             |             | C | 1.59035906  | 2.69997018                            | -1.03430173 |             | C           |
| 1.11172072                              | 1.55544665  |   | O           | 1.41512356                            |             |             | 0.95447494  |
| 2.01452126                              |             |   | 1.56889007  | 1.71234046                            |             | O           | 1.69206494  |
| 2.54468137                              |             | C | -2.16385729 | 1.23778663                            | 2.81443579  |             | C           |
| 1.86327229                              | 0.94113923  |   | C           | -2.26055110                           |             |             | 1.42171489  |
| -3.43914870                             |             |   | 2.52527664  | 1.11289091                            |             | C           | -3.61691675 |
| 0.44345575                              |             | C | -1.76070398 | 1.97229969                            | 0.69844212  |             | C           |
| 2.36519709                              | 2.31765640  |   | H           | -1.93709380                           |             |             | 1.76181616  |
| -2.36183476                             |             |   | 0.78176312  | 2.55824121                            |             | H           | -2.31038464 |
| 1.01840056                              |             | H | -3.80111337 | 0.32295410                            | 1.02732194  |             | H           |
| 2.09823511                              | -0.50244886 |   | H           | -3.92143737                           |             |             | 1.65463515  |
| -4.24573842                             |             |   | 2.38240351  | -0.30861912                           |             | H           | -4.39384794 |
| 1.17880969                              |             | H | -3.32324826 | 1.61129887                            | 1.38995761  |             | H           |
| 3.61168705                              | 0.30558257  |   | H           | -3.64890706                           |             |             | 3.07244130  |
| -0.82577692                             |             |   | 1.91041231  | 0.73271027                            |             | H           | -0.95002913 |
| 2.67635243                              |             | H | -1.62825040 | 1.39535485                            | 2.87291333  |             | H           |
| 3.45839108                              | 2.33169486  |   | H           | -1.96523658                           |             |             | 2.84753403  |
| -2.54466095                             |             |   | 2.13018762  | 2.73839394                            |             | H           | -2.68488725 |
| 3.05336003                              |             | C | -0.39503996 | 1.31010023                            | 3.22760269  |             | C           |
| 3.71046123                              | -0.50779561 |   | C           | -0.77719861                           |             |             | 3.68125004  |
| -0.02483506                             |             |   | 4.07344787  | -0.06634981                           |             | C           | -0.37261301 |
| -1.93825577                             |             | C | 0.67998566  | 4.25209184                            | -1.41772387 |             | C           |
| 4.17000336                              | 0.46991939  |   | H           | 0.16824275                            |             |             | 4.15409906  |

|             |             |             |             |             |   |             |
|-------------|-------------|-------------|-------------|-------------|---|-------------|
| -1.34081691 |             | 4.22455488  | 1.03227814  |             | H | -1.79912973 |
| -0.25473541 |             | -0.82925337 | 4.03226085  | 0.16925024  |   | H           |
| 3.86592671  | -2.65636075 |             | -1.09390068 |             |   | 4.02301366  |
| 0.19265646  |             | 5.14986236  | -2.21366801 |             | H | -0.29914226 |
| -2.00664523 |             | 0.87819365  | 5.34824396  | -1.35701941 |   | H           |
| 3.54556750  | -2.27543335 |             | 0.61305484  |             |   | 3.88439357  |
| 0.47907670  |             | 3.86950875  | -1.73643127 |             | H | -0.03490136 |
| 1.50719473  |             | 1.66374608  | 3.69315759  | 2.00819626  |   | H           |
| 3.75822603  | 0.20226499  |             | 1.21334645  |             |   | 3.92399813  |
| 0.76962616  |             | 5.26655364  | 0.78160804  |             | H | 0.09574541  |
| 0.45324268  |             | 2.51508395  | 5.24480354  | 1.15796826  |   | C           |
| -2.53901333 | 1.49970057  |             | 2.78489255  |             |   | -2.41441280 |
| 3.35569501  |             | -1.94060866 | 1.11046645  |             | C | 3.44526989  |
| 2.61762467  |             | 2.98102724  | -1.92426999 | 2.39008860  |   | C           |
| -3.94299448 | 1.14384907  |             | 3.44426525  |             |   | -3.68874729 |
| 1.47621071  |             | -2.60953712 | 0.60352201  |             | H | 1.72979309  |
| 1.86634881  |             | 3.06168959  | -2.64581536 | 1.34360243  |   | H           |
| -0.91216694 | 2.86921525  |             | 3.03038860  |             |   | -0.97369098 |
| 3.25519203  |             | -2.54404265 | 2.75111852  |             | H | 3.31584767  |
| 3.53189544  |             | 4.42602478  | -2.66605273 | 3.19221787  |   | H           |
| -1.93537175 | 2.36212250  |             | 4.52980749  |             |   | -1.79366154 |
| 2.31856489  |             | -4.44608702 | 2.25902996  |             | H | 2.93133421  |
| 0.42684537  |             | 3.99713830  | -4.12461534 | -0.26442175 |   | H           |
| -3.94844273 | 0.71982610  |             | 4.49571840  |             |   | -3.52469341 |
| 3.01500462  |             | -4.57251376 | 0.32199251  |             | H | 3.44849472  |
| 2.04588872  |             | 4.14085324  | -4.45527656 | 1.39327524  |   | C           |
| -1.20842121 | -0.52150850 |             | 4.35984288  |             |   | -0.66590290 |
| 4.81505355  |             | -0.03783567 | -0.65696023 |             | C | 4.94869539  |
| 0.18652292  |             | 4.28718983  | 0.37796181  | 0.28540558  |   | C           |
| -1.08081575 | -2.03057661 |             | 4.47080658  |             |   | -0.20806145 |
| 4.63839124  |             | -2.14500112 | -2.10426558 |             | H | 4.92807263  |
| -0.20670823 |             | 4.65399512  | -1.60858245 | -0.54593119 |   | H           |
| -0.02947509 | 1.27189551  |             | 4.81549748  |             |   | 0.13495662  |
| 5.90148262  |             | -0.06615288 | 1.34704700  |             | H | 6.02889638  |
| 0.01443677  |             | 4.45285003  | 0.48452184  | 0.10509621  |   | H           |
| 0.92369230  | -0.19994635 |             | 4.49550928  |             |   | 1.36411577  |
| 3.89624973  |             | -1.95080856 | 0.11996358  |             | H | 4.16100605  |
| -2.57598945 |             | 3.78488613  | -0.97905164 | -2.82307983 |   | H           |
| -0.18066277 | -2.41333432 |             | 3.86954953  |             |   | 0.69413015  |
| 5.35040951  |             | -0.98617303 | -2.29043135 |             | H | 5.51403550  |
| -2.29756559 |             | -0.34576314 | 0.05131779  | -2.33901211 |   | H           |
| -0.61267246 | 1.10539290  |             | -0.34012793 |             |   | -1.04322221 |
| -5.85642235 |             | -1.23599112 | 1.18532417  |             | C | -5.84082413 |
| -0.51446688 |             | -5.28155430 | -1.78503958 | -0.68017925 |   | C           |
| -1.20827034 | 0.75128794  |             | -5.28141499 |             |   | -1.92731027 |
| -3.90092889 |             | -1.36907984 | 0.58833099  |             | C | -3.89603603 |
| 0.93125832  |             | -3.05019052 | -1.96648186 | 0.77542538  |   | C           |
| -1.57778959 | -0.20081574 |             | -3.03701772 |             |   | -1.87391076 |
| -3.66046904 |             | -1.61704381 | -0.35223839 |             | C | -3.60853984 |
| -1.47830310 |             | -5.02897649 | -1.72761438 | -1.62786382 |   | C           |
| -1.44464435 | -1.62689904 |             | -4.99163551 |             |   | -1.68285080 |
| -3.89907803 |             | -1.22488045 | -1.78397308 |             | H | -3.92586052 |
| 3.11556178  |             | -6.93278940 | -2.12165722 | 2.96029908  |   | H           |
| -1.10546205 | -0.63978494 |             | -6.92416989 |             |   | -1.75445661 |
| -5.90616496 |             | -1.05040096 | -0.80807137 |             | H | -5.92623947 |
| 1.63651126  |             | -3.26792850 | -1.99854925 | 1.46945839  |   | C           |
| -1.32908062 | 2.22710493  |             | -3.27475698 |             |   | -2.05535266 |

|                                |             |   |             |                                |             |             |             |
|--------------------------------|-------------|---|-------------|--------------------------------|-------------|-------------|-------------|
| -3.02375736                    |             |   | -1.79379638 | 2.08349504                     |             | H           | -2.94937817 |
| -2.35071264                    |             | H | -5.46553034 | -1.65823897                    | -2.49848652 |             | H           |
| -1.47855547                    | -2.62888555 |   | C           | -5.41034705                    |             |             | -1.57071932 |
| -1.05865574                    |             |   | -1.56437033 | -2.78723457                    |             | C           | -1.00512777 |
| 1.15672965                     |             | C | -1.92687478 | -1.95275963                    | 1.08104999  |             | C           |
| -1.41318748                    | 2.34963623  |   | H           | -1.93861504                    |             |             | -2.03555846 |
| -0.30111393                    |             |   | -2.35475137 | 2.23658315                     |             | H           | -0.28425222 |
| 1.33505106                     |             | H | -1.44430803 | -2.79884811                    | 1.12412405  |             | H           |
| -1.36808039                    | 3.33009984  |   | N           | -1.48793761                    |             |             | -2.07888858 |
| -1.70714182                    |             |   | -1.75485548 | 3.23127994                     |             | N           | -1.67480356 |
| -0.08503089                    |             | H | -0.88072837 | -1.92670355                    | -0.19316307 |             | H           |
| -1.20414727                    | -0.96058641 |   |             | -1.09505867                    | -1.50338152 | -0.93082532 |             |
| <b>Mn-5' iPrOH<sub>o</sub></b> |             |   |             | <b>Mn-5' iPrOH<sub>H</sub></b> |             |             |             |
| P                              | -2.27710058 |   | -0.15892966 | P                              | 2.26800468  |             | 0.32150691  |
| -0.12811145                    |             | P | 2.26816442  | -0.06953585                    |             | P           | -2.26796404 |
| -0.24622033                    | -0.21411592 |   | C           | 0.32256854                     | -0.06739975 |             | C           |
| -2.46470652                    |             |   | -0.08490490 | 2.40070223                     |             |             | -0.50182028 |
| -1.96481811                    |             | C | 2.37739148  | -1.71372251                    |             | C           | -2.40261361 |
| -0.18550824                    | -2.05822433 |   | H           | -0.50073991                    | -1.71148670 |             | H           |
| -2.44398795                    |             |   | 0.98814739  | 2.33098418                     |             |             | -1.58553898 |
| -2.22593352                    |             | H | 2.38909747  | -1.51883060                    |             | H           | -2.33345805 |
| 0.88709842                     | -2.31931118 |   | H           | -1.58450053                    | -1.51662194 |             | H           |
| -3.42699995                    |             |   | -0.48109388 | 3.36130108                     |             |             | -0.32230351 |
| -2.32503271                    |             | H | 3.30598179  | -2.22128881                    |             | H           | -3.36360880 |
| -0.62246770                    | -2.45706220 |   | C           | -0.32077424                    | -2.21814674 |             | C           |
| -1.26260071                    |             |   | -0.77135742 | 1.19787639                     |             |             | -0.09720886 |
| -2.59109169                    |             | C | 1.12401021  | -2.54174844                    |             | C           | -1.20036859 |
| -0.82421379                    | -2.63367188 |   | H           | -0.09670687                    | -2.54063577 |             | H           |
| -1.26673512                    |             |   | -0.59121014 | 1.08707481                     |             |             | -0.79592895 |
| -3.68811518                    |             | H | 1.09337151  | -3.39633436                    |             | H           | -1.09065872 |
| -0.64828682                    | -3.73095480 |   | H           | -0.79545486                    | -3.39534403 |             | H           |
| -1.36488131                    |             |   | -1.87724034 | 1.34664423                     |             |             | 0.90266871  |
| -2.48603510                    |             | H | 1.18286369  | -3.00084538                    |             | H           | -1.34918424 |
| -1.93325461                    | -2.52678140 |   | N           | 0.90322875                     | -2.99959396 |             | N           |
| -0.04750328                    |             |   | -0.27198039 | -0.00088230                    |             |             | -0.12385065 |
| -1.98856210                    |             | C | 3.23987719  | -1.71107680                    |             | C           | -3.14770038 |
| 1.26189195                     | 0.29540670  |   | C           | -0.88250070                    | 1.05695316  |             | C           |
| -3.25117645                    |             |   | 1.33203442  | 3.14828133                     |             |             | -0.88397794 |
| 0.44111911                     |             | H | 2.57858624  | 1.05393716                     |             | H           | -2.40282715 |
| 2.06889118                     | -0.06315463 |   | H           | -1.69517232                    | 1.13709541  |             | H           |
| -2.60756588                    |             |   | 2.17129115  | 2.40316601                     |             |             | -1.69637489 |
| 0.12667610                     |             | C | 3.33182424  | 1.13467677                     |             | C           | -3.40340244 |
| -1.66955224                    | 0.35543619  |   | C           | 1.80001506                     | -0.15121712 |             | C           |
| -3.34113232                    |             |   | -1.57645783 | 3.40400123                     |             |             | 1.79846923  |
| 0.46762808                     |             | C | 3.28562518  | -0.15432344                    |             | C           | -3.24548050 |
| -2.86515160                    | -0.58508044 |   | C           | 2.54852151                     | -1.46740614 |             | C           |
| -3.36699623                    |             |   | -2.75520197 | 3.24521423                     |             |             | 2.54708330  |
| -0.49437441                    |             | O | 0.03728692  | -1.47034347                    |             | O           | 0.00160141  |
| 0.11994525                     | 3.03982495  |   | H           | 0.51613449                     | 3.07016412  |             | H           |
| -4.36489264                    |             |   | -1.16151847 | 4.42856609                     |             |             | 1.38183543  |
| 0.52658333                     |             | H | 4.36619173  | -0.10773149                    |             | H           | -4.42811763 |
| -1.27718861                    | 0.36251306  |   | C           | 1.38385819                     | -0.10365792 |             | C           |
| -2.92250897                    |             |   | -2.02314739 | 3.20077995                     |             |             | 2.74617720  |
| 1.86451568                     |             | C | 2.95999826  | 1.02233600                     |             | C           | -3.19862675 |
| -2.07993960                    | 1.77646215  |   | H           | 2.74767493                     | 1.02520572  |             | H           |
| -2.79592097                    |             |   | -1.19103358 | 3.20975551                     |             |             | 2.24569130  |
| 2.56958091                     |             | H | 2.90021209  | 1.99799683                     |             | H           | -3.20702128 |

|             |             |    |             |             |             |    |             |
|-------------|-------------|----|-------------|-------------|-------------|----|-------------|
| -1.23231728 | 2.47216852  |    | H           | 2.24724821  | 2.00090039  |    | H           |
| -1.97004823 |             |    |             | 2.24613664  |             |    | 3.28168213  |
| 1.83941422  |             | H  | 1.98413051  | 0.93957770  |             | H  | -2.24375501 |
| -2.58426899 | 1.80113049  |    | H           | 3.28264046  | 0.94157450  |    | H           |
| -3.67542375 |             |    | -2.70513235 | 3.99605064  |             |    | 3.50656430  |
| 2.28793672  |             | H  | 3.70172934  | 1.03597576  |             | H  | -3.99346304 |
| -2.78706861 | 2.17767166  |    | C           | 3.50850340  | 1.03949923  |    | C           |
| 3.37281674  |             |    | 1.39170926  | -3.39397266 |             |    | -0.34364988 |
| 1.80472251  |             | C  | -3.38748105 | 2.45807646  |             | C  | 3.39606103  |
| 1.38861400  | 1.95542626  |    | H           | -0.34536209 | 2.45488367  |    | H           |
| 4.08248814  |             |    | 0.65685646  | -4.21200004 |             |    | 0.39217530  |
| 2.21536750  |             | H  | -4.10616588 | 2.46844017  |             | H  | 4.21437426  |
| 0.64041143  | 2.32361113  |    | H           | 0.39015384  | 2.46455850  |    | H           |
| 2.41515754  |             |    | 1.26074640  | -2.50554402 |             |    | 0.12390143  |
| 2.32843184  |             | H  | -2.43467558 | 2.90209808  |             | H  | 2.50822711  |
| 1.21829848  | 2.47730773  |    | H           | 0.12248253  | 2.89978437  |    | H           |
| 3.76334794  |             |    | 2.38570751  | -3.70062078 |             |    | -1.16144367 |
| 2.07225391  |             | H  | -3.76784255 | 3.12694024  |             | H  | 3.70302992  |
| 2.37173578  | 2.27206587  |    | C           | -1.16333684 | 3.12338030  |    | C           |
| 4.58792531  |             |    | 1.39405056  | -4.42571180 |             |    | -1.45597494 |
| -0.39627724 |             | C  | -4.60047593 | 0.46260945  |             | C  | 4.42551628  |
| 1.49144388  | -0.24362881 |    | H           | -1.45789515 | 0.45834934  |    | H           |
| 4.51047105  |             |    | 1.38025113  | -4.26738897 |             |    | -1.96367034 |
| -1.49219059 |             | H  | -4.52057587 | -0.49820650 |             | H  | 4.26609773  |
| 1.55660089  | -1.33726617 |    | H           | -1.96534801 | -0.50240923 |    | H           |
| 5.28535407  |             |    | 0.59389844  | -5.19044403 |             |    | -0.67902655 |
| -0.10301362 |             | H  | -5.28383086 | 0.30630673  |             | H  | 5.19043649  |
| 0.66027038  | -0.01049233 |    | H           | -0.68124236 | 0.30150401  |    | H           |
| 5.07016414  |             |    | 2.34431162  | -4.86509759 |             |    | -2.19635805 |
| -0.11904714 |             | H  | -5.09897065 | 1.14850254  |             | H  | 4.86520085  |
| 2.41113601  | 0.09938951  |    | H           | -2.19857964 | 1.14372789  |    | H           |
| 3.93502190  |             |    | -3.66817997 | -3.91153964 |             |    | 3.42403148  |
| -0.20477438 |             | H  | 2.27242297  | -1.48771729 |             | H  | -2.21944321 |
| -3.28419570 | -0.66110780 |    | H           | 2.92637218  | -1.59240205 |    | H           |
| 3.63101824  |             |    | -2.62615389 | -3.49170358 |             |    | 1.93498347  |
| -1.60014713 |             | H  | -4.01718649 | -2.34475457 |             | H  | 3.91166219  |
| -3.54927633 | -0.09691592 |    | H           | 3.42228336  | -1.49125700 |    | H           |
| -3.75431786 |             |    | -2.49020014 | 3.49032932  |             |    | 1.93343960  |
| -1.48763987 |             | H  | -2.36936913 | -2.34793003 |             | H  | 2.21923566  |
| -3.19710266 | -0.62507673 |    | C           | 2.92541146  | -1.59438121 |    | C           |
| 0.02668146  |             |    | -0.01040376 | 0.00095646  |             |    | 0.53036902  |
| 1.87591578  |             | Mn | -0.00443597 | 1.89948118  |             | Mn | 0.00012563  |
| -0.26140976 | 0.11331587  |    | C           | 0.56203138  | 0.11445973  |    | C           |
| -0.03442028 |             |    | -2.00032953 | 0.00047904  |             |    | 2.30309279  |
| 0.24209788  |             | O  | -0.04052910 | 0.04637527  |             | O  | 0.00067405  |
| -3.17412234 | 0.27398741  |    | H           | 3.46678936  | -0.10420655 |    | H           |
| -1.25864615 |             |    | 3.24379988  | 0.00116270  |             |    | -2.32550868 |
| -0.83017187 |             | H  | 0.05498330  | 0.47629509  |             | H  | -0.00012448 |
| 1.36260700  | -1.51724527 |    | C           | -1.97202862 | -1.54010236 |    | C           |
| -0.21133087 |             |    | 3.15131430  | 0.00049301  |             |    | -3.27772774 |
| -0.46921605 |             | O  | 0.22417101  | -0.11755391 |             | O  | 0.00227639  |
| 1.81106204  | -0.62124936 |    | C           | -2.95324999 | -1.48995896 |    | C           |
| 0.65540863  |             |    | 4.06974729  | 1.25241339  |             |    | -4.06395941 |
| -1.30823401 |             | H  | 0.31735894  | 0.22680800  |             | H  | 1.31139287  |
| 5.11327378  | -1.23838437 |    | H           | -4.29872194 | 1.29980346  |    | H           |
| 1.70310513  |             |    | 4.03128206  | 1.26418952  |             |    | -5.01289141 |
| -0.97378561 |             | H  | 0.63099436  | -0.32953371 |             | H  | 2.16147077  |

|                                            |             |             |             |                                            |             |             |             |
|--------------------------------------------|-------------|-------------|-------------|--------------------------------------------|-------------|-------------|-------------|
| 3.78134427                                 | -2.36866692 |             | C           | -3.51456081                                | -0.05561981 |             | C           |
| -0.17060111                                |             | 3.48062825  |             | -1.25393569                                |             | -4.06092680 |             |
| 1.00411999                                 |             | H           | 0.85557517  | 0.22483360                                 |             | H           | -1.26689041 |
| 3.38801535                                 | 1.39084464  |             | H           | -5.01008436                                | -0.33109653 |             | H           |
| -0.51691445                                |             | 4.50509580  |             | -1.31556677                                |             | -4.29503969 |             |
| 1.19751882                                 |             | H           | -0.79887569 | 1.29783845                                 |             | H           | -2.16120307 |
| 2.78643617                                 | 1.57958268  |             |             | -3.50956677                                | -0.05955536 |             |             |
| <b>TSB-iPrOH-H<sub>0</sub><sup>+</sup></b> |             |             |             | <b>TSB-iPrOH-H<sub>H</sub><sup>+</sup></b> |             |             |             |
| P                                          | -2.30482239 |             | -0.13447475 | P                                          | 0.26801158  |             | -0.00501917 |
| -0.13078181                                | P           | 2.26640772  | -0.17932175 | 2.27504955                                 |             | P           | 0.26975833  |
| -0.25137805                                | C           | -2.50084736 | 0.54524226  | -0.01630435                                | -2.27475561 |             | C           |
| -1.83974180                                | C           | 2.35289589  | 0.43815040  | -0.37796776                                |             |             | -1.72880415 |
| -1.99316535                                | H           | -2.50571467 | 1.64485974  | 2.41854982                                 |             | C           | -0.37576863 |
| -1.74220233                                | H           | 2.38811585  | 1.53802920  | -1.74093865                                | -2.41018644 |             | H           |
| -1.91662434                                | H           | -3.45906146 | 0.26412279  | -1.47608052                                |             |             | -1.66167538 |
| -2.30566875                                | H           | 3.26878680  | 0.12368272  | 2.32716532                                 |             | H           | -1.47397749 |
| -2.51696350                                | C           | -1.30143963 | 0.11404456  | -1.67363961                                | -2.32005278 |             | H           |
| -2.66716389                                | C           | 1.08942505  | 0.02965733  | -0.15253614                                |             |             | -2.21268875 |
| -2.73001802                                | H           | -1.30105411 | 0.66508485  | 3.38100275                                 |             | H           | -0.14928939 |
| -3.63225894                                | H           | 1.05489604  | 0.54537417  | -2.22958916                                | -3.36997693 |             | C           |
| -3.71367803                                | H           | -1.40048267 | -0.95682078 | 0.12619534                                 |             |             | -2.52276185 |
| -2.95078153                                | H           | 1.12428851  | -1.05550321 | 1.22633449                                 |             | C           | 0.12764057  |
| -2.97617436                                | N           | -0.07716478 | 0.35411180  | -2.52873655                                | -1.21355637 |             | H           |
| -1.93413405                                | C           | 3.24865048  | 1.12026777  | -0.36144442                                |             |             | -3.51643985 |
| 0.65564073                                 | C           | -3.33596565 | 1.05632584  | 1.20281560                                 |             | H           | -0.35945953 |
| 0.89511375                                 | H           | 2.59209610  | 1.99596863  | -3.52256140                                | -1.18551336 |             | H           |
| 0.51587099                                 | H           | -3.06593832 | 2.02947385  | 1.21414082                                 |             |             | -2.70959798 |
| 0.44842572                                 | C           | 3.33943870  | -1.70144793 | 1.28793106                                 |             | H           | 1.21573147  |
| -0.17340255                                | C           | -3.33977349 | -1.68983187 | -2.71529711                                | -1.27322160 |             | N           |
| -0.14178396                                | C           | 3.20239840  | -2.58829662 | -0.19092974                                |             |             | -1.77805367 |
| -1.40279145                                | C           | -3.11651824 | -2.56386838 | 0.00436972                                 |             | C           | -0.90952273 |
| -1.36735182                                | O           | 0.07271811  | -0.69590971 | 1.01514624                                 | -3.28710971 |             | C           |
| 3.00891172                                 | H           | -4.38345932 | -1.33527808 | -0.91156830                                |             |             | 1.03129078  |
| -0.19058527                                | H           | 4.37848906  | -1.32365396 | 3.28209979                                 |             | H           | -1.76463983 |
| -0.13744208                                | C           | -3.15605898 | -2.46357692 | 1.14155841                                 | -2.60686051 |             | H           |
| 1.15590615                                 | C           | 3.06412581  | -2.48923099 | -1.76690687                                |             |             | 1.15376814  |
| 1.10319042                                 | H           | -3.37647464 | -1.85412824 | 2.60141051                                 |             | C           | 1.82553049  |
| 2.04413302                                 |             | H           | 3.06880248  | 0.03217108                                 | -3.31459487 |             | C           |
| -1.86603360                                | 2.00730772  | H           | -2.12860101 | 1.82334350                                 |             |             | 0.04835350  |
| -2.83948570                                | 1.26316295  | H           | 2.08557777  | 3.31538391                                 |             | C           | 2.62638348  |
| -2.98626679                                | 1.06013191  | H           | -3.82686467 | -1.26122831                                | -3.27542967 |             | C           |
| -3.33542241                                | 1.18490211  | H           | 3.82175912  | 2.62396508                                 |             |             | -1.24538338 |
| -3.27561803                                | 1.23944701  | C           | 3.37209811  | 3.28309126                                 |             | O           | 0.71610227  |
| 0.84865298                                 | 2.14661682  | C           | -2.90707492 | 3.14817231                                 | -0.00762812 |             | H           |
| 1.09153403                                 | 2.35376127  | H           | 4.09507443  | 1.45182058                                 |             |             | 0.19225927  |
| 0.04513601                                 | 2.35542398  |             | H           | 4.34815577                                 |             | H           | 1.45438759  |
| -3.07311330                                |             |             | 0.13206010  | 0.17075658                                 | -4.34823761 |             | C           |
| 2.86535575                                 | H           | 2.41610758  | 0.56755893  | 2.70977626                                 |             |             | 1.23509935  |
| 2.60978737                                 | H           | -1.84051258 | 1.32608095  | 2.95109604                                 |             | C           | 2.71153802  |
| 2.46169634                                 | H           | 3.74151097  | 1.74400354  | 1.22083272                                 | -2.95555020 |             | H           |
| 2.66992905                                 | H           | -3.47594000 | 1.85502056  | 2.16292510                                 |             |             | 2.18137071  |
| 2.90618961                                 | C           | 4.60354434  | 1.42212578  | 2.85696394                                 |             | H           | 2.16433034  |
| 0.03365000                                 | C           | -4.84184785 | 0.89916300  | 2.16724221                                 | -2.86489427 |             | H           |
| 0.75139468                                 | H           | 4.53991556  | 1.68447900  | 3.22964474                                 |             |             | 1.06637617  |
| -1.03145870                                | H           | -5.16983249 | 0.84744387  | 1.99930912                                 |             | H           | 3.23186083  |
| -0.29737675                                | H           | 5.30212270  | 0.57609445  | 1.05605928                                 | -2.00329615 |             | H           |
| 0.12677187                                 | H           | -5.21352095 | -0.00065219 | 3.48454816                                 |             |             | 1.37805891  |

|             |             |             |             |             |             |    |             |
|-------------|-------------|-------------|-------------|-------------|-------------|----|-------------|
| 1.26410004  | H           | 5.07731424  | 2.27357532  | 3.71939270  |             | H  | 3.48595353  |
| 0.54629188  | H           | -5.35820425 | 1.75624227  | 1.36104316  | -3.72470980 |    | C           |
| 1.20987635  |             | H           | 3.85875134  | -0.36503141 |             |    | 2.40392491  |
| -3.46663695 | -1.30882593 | H           | 2.17783878  | -3.58554873 |             | C  | -0.36749907 |
| -2.96841954 | -1.51945601 | H           | 3.48318122  | 2.42178250  | 3.57323322  |    | H           |
| -2.07629523 | -2.33350336 | H           | -3.77012177 | 0.45874842  |             |    | 2.37766931  |
| -3.44771976 | -1.31210134 | H           | -3.36469251 | -4.31484363 |             | H  | 0.45536892  |
| -2.04422885 | -2.30322084 | H           | -2.08725061 | 2.39967688  | 4.30370278  |    | H           |
| -2.93490136 | -1.44594812 | C           | 0.04147801  | -0.00773217 |             |    | 2.92183439  |
| -0.51515629 | 1.85361313  | Mn          | -0.01116993 | -2.68446259 |             | H  | -0.00901188 |
| -0.28789939 | 0.09048472  | C           | -0.02956052 | 2.93451419  | 2.66966475  |    | H           |
| -2.01532087 | -0.17418659 | O           | -0.01039888 | -1.15620793 |             |    | 3.02797813  |
| -3.17703391 | -0.34465499 | H           | -1.37826480 | -4.02687762 |             | H  | -1.15920930 |
| 2.94339365  | 0.56989233  | H           | 0.03001654  | 3.04837930  | 4.00996645  |    | C           |
| 1.54767641  | -1.10450758 | C           | -0.27298611 | -1.39113097 |             |    | 0.31834073  |
| 3.03143265  | 0.48752823  | O           | 0.26535449  | -4.54990305 |             | C  | -1.39265791 |
| 1.85632832  | -0.07279409 | C           | 0.03922756  | 0.34065861  | 4.54849586  |    | H           |
| 4.21009305  | -0.41443953 | H           | -0.36329335 | -1.90529392 |             |    | -0.63024145 |
| 5.14894178  | -0.00829930 | H           | 1.12795305  | -4.34294707 |             | H  | -1.90962541 |
| 4.32805663  | -0.52799321 | H           | -0.38747528 | -0.60736775 | 4.34597545  |    | H           |
| 4.06807377  | -1.41807029 | C           | 0.28755161  | -0.56425486 |             |    | 0.10310371  |
| 3.20866401  | 1.88307224  | H           | 1.36830231  | -5.24548261 |             | H  | -0.56517634 |
| 3.41521084  | 1.84853700  |             | H           | 0.12584177  | 5.24347431  |    | H           |
| -0.19647724 |             |             | 4.04471003  | -2.10251837 |             |    | 0.95867947  |
| 2.40788473  | H           | 0.14511309  | 2.29934274  | -5.09326448 |             | H  | -2.10142260 |
| 2.48459050  |             |             |             | 0.98489586  | 5.09067203  |    | H           |
|             |             |             |             | 3.49981729  |             |    | -1.17883108 |
|             |             |             |             | -3.93969628 |             | H  | 3.01556152  |
|             |             |             |             | -1.46932277 | -2.26870930 |    | H           |
|             |             |             |             | 2.05205018  |             |    | -2.13576954 |
|             |             |             |             | -3.61018379 |             | H  | 3.49541010  |
|             |             |             |             | -1.16095885 | 3.94970813  |    | H           |
|             |             |             |             | 2.04843515  |             |    | -2.11865781 |
|             |             |             |             | 3.61909343  |             | H  | 3.01602768  |
|             |             |             |             | -1.45702001 | 2.27821608  |    | C           |
|             |             |             |             | 0.56378538  |             |    | 1.98979054  |
|             |             |             |             | -0.00476705 |             | Mn | 0.37627359  |
|             |             |             |             | 0.21613456  | -0.00038959 |    | C           |
|             |             |             |             | 2.08833813  |             |    | -0.10484365 |
|             |             |             |             | 0.00096162  |             | O  | 3.22452891  |
|             |             |             |             | -0.39944631 | 0.00196421  |    | H           |
|             |             |             |             | -1.80596005 |             |    | 0.25187866  |
|             |             |             |             | -0.00156830 |             | H  | -1.34942777 |
|             |             |             |             | -1.74482035 | 0.00359799  |    | C           |
|             |             |             |             | -2.86837843 |             |    | -0.31718477 |
|             |             |             |             | -0.00060171 |             | O  | -2.67813812 |
|             |             |             |             | -1.63714438 | 0.00231036  |    | C           |
|             |             |             |             | -3.60383519 |             |    | 0.18180827  |
|             |             |             |             | 1.24519352  |             | H  | -3.62647307 |
|             |             |             |             | 1.27963550  | 1.33395566  |    | H           |
|             |             |             |             | -4.64411315 |             |    | -0.17411684 |
|             |             |             |             | 1.20108131  |             | H  | -3.17074446 |
|             |             |             |             | -0.24460377 | 2.15947412  |    | C           |
|             |             |             |             | -3.60327791 |             |    | 0.17639590  |
|             |             |             |             | -1.24888110 |             | H  | -4.64379233 |
|             |             |             |             | -0.17865998 | -1.20331845 |    | H           |
|             |             |             |             | -3.62525773 |             |    | 1.27380671  |



|                                 |             |             |             |                                 |             |   |             |
|---------------------------------|-------------|-------------|-------------|---------------------------------|-------------|---|-------------|
|                                 |             |             |             | -1.34279993                     |             | H | -3.17024516 |
|                                 |             |             |             | -0.25459138                     | -2.16104334 |   |             |
| <b>H-Mn-5'-OiPr<sub>O</sub></b> |             |             |             | <b>H-Mn-5'-OiPr<sub>H</sub></b> |             |   |             |
| P                               | -2.29478671 |             | -0.13876840 | P                               | 2.27718804  |   | -0.16261253 |
| -0.15030803                     | P           | 2.25287020  | -0.19226785 | 0.04221880                      |             | P | -2.27515708 |
| -0.21578569                     | C           | -2.45982885 | -0.12357715 | -0.16878806                     | 0.04055583  |   | C           |
| -1.99723027                     | C           | 2.35662567  | -0.17366306 | 2.41172246                      |             |   | 0.49897014  |
| -2.06585164                     | H           | -2.39289324 | 0.93911886  | 1.76192852                      |             | C | -2.41282856 |
| -2.28856796                     | H           | 2.28979724  | 0.89093050  | 0.49269397                      | 1.76014346  |   | H           |
| -2.34783697                     | H           | -3.43382805 | -0.49079917 | 2.30753375                      |             |   | 1.59601275  |
| -2.35479195                     | H           | 3.31282762  | -0.55362915 | 1.68720435                      |             | H | -2.31178644 |
| -2.45630128                     | C           | -1.30262240 | -0.87993426 | 1.59002259                      | 1.68553265  |   | H           |
| -2.62415469                     | C           | 1.16806545  | -0.91195552 | 3.37548267                      |             |   | 0.28708468  |
| -2.65477511                     | H           | -1.31709264 | -0.76723039 | 2.24935996                      |             | H | -3.37639907 |
| -3.72612775                     | H           | 1.15344369  | -0.80701022 | 0.27821199                      | 2.24680604  |   | C           |
| -3.75751337                     | H           | -1.37574358 | -1.96296392 | 1.22562371                      |             |   | -0.01194357 |
| -2.42273873                     | H           | 1.22301321  | -1.99506493 | 2.56079127                      |             | C | -1.22596170 |
| -2.44676878                     | N           | -0.05397720 | -0.38221205 | -0.01496241                     | 2.55994615  |   | H           |
| -2.05948480                     | C           | 3.20144933  | 1.33297568  | 1.20661510                      |             |   | 0.46488045  |
| 0.25315567                      | C           | -3.27782368 | 1.36502364  | 3.55913815                      |             | H | -1.20892774 |
| 0.34330802                      | H           | 2.48154527  | 2.10873804  | 0.46207300                      | 3.55823002  |   | H           |
| -0.05710846                     | H           | -2.61601601 | 2.18844555  | 1.28073146                      |             |   | -1.10162026 |
| 0.02581198                      | C           | 3.34923665  | -1.59706997 | 2.73131490                      |             | H | -1.27834367 |
| 0.34142305                      | C           | -3.37219437 | -1.54981968 | -1.10473201                     | 2.73063419  |   | N           |
| 0.43966665                      | C           | 3.28410150  | -2.81056587 | -0.00033871                     |             |   | 0.31212283  |
| -0.57483049                     | C           | -3.34861146 | -2.75814064 | 1.82321966                      |             | C | -3.31072148 |
| -0.48511272                     | O           | 0.02946344  | 0.14713255  | 0.98155104                      | -1.00054682 |   | C           |
| 3.02646614                      | H           | -4.40185515 | -1.14520211 | 3.30934979                      |             |   | 0.99156674  |
| 0.44675646                      |             | H           | 4.38037415  | -0.99786908                     |             | H | -2.64239256 |
| -1.19608180                     | 0.31037526  | C           | -3.00161708 | 1.84126902                      | -1.14983126 |   | H           |
| -1.95391525                     | 1.86255204  | C           | 3.02150767  | 2.63845286                      |             |   | 1.84947402  |
| -1.99083748                     | 1.77782716  | H           | -2.94307839 | -1.14608816                     |             | C | -3.30338597 |
| -1.10441315                     | 2.55519878  | H           | 2.99702312  | -1.73452164                     | 0.01514495  |   | C           |
| -1.13730538                     | 2.46771841  | H           | -2.02763169 | 3.31000132                      |             |   | -1.72524946 |
| -2.46085318                     | 1.89138835  | H           | 2.04072743  | 0.01668584                      |             | C | -3.26713364 |
| -2.48254486                     | 1.83866359  | H           | -3.74565038 | -2.51824502                     | 1.31893758  |   | C           |
| -2.65760851                     | 2.26548988  | H           | 3.76759190  | 3.27502819                      |             |   | -2.50957323 |
| -2.70366315                     | 2.16030341  | C           | 3.41345261  | 1.32014939                      |             | O | 0.00249992  |
| 1.44070661                      | 1.75526449  | C           | -3.45593228 | -0.63337822                     | -3.11651669 |   | H           |
| 1.45441325                      | 1.85208048  | H           | 4.18755549  | 4.34414076                      |             |   | -1.35849846 |
| 0.74191629                      | 2.10942571  |             | H           | -0.12889432                     |             | H | -4.33847349 |
| -4.20580474                     |             |             | 0.73402061  | -1.37077306                     | -0.13127101 |   | C           |
| 2.21449249                      | H           | 2.49646584  | 1.24621440  | 2.94811650                      |             |   | -2.62623324 |
| 2.32984758                      | H           | -2.52257005 | 1.27134987  | -1.15991666                     |             | C | -2.93820619 |
| 2.40408630                      | H           | 3.75739273  | 2.45204736  | -2.63500184                     | -1.16081650 |   | H           |
| 2.02064822                      | H           | -3.81500412 | 2.45457073  | 2.85033348                      |             |   | -2.09002587 |
| 2.13742232                      | C           | 4.50380236  | 1.52655214  | -2.11189747                     |             | H | -2.84125915 |
| -0.50661107                     | C           | -4.60793183 | 1.51315920  | -2.09897468                     | -2.11298101 |   | H           |
| -0.38017588                     | H           | 4.36504444  | 1.56564213  | 1.99896825                      |             |   | -3.14851483 |
| -1.59575160                     | H           | -4.49933767 | 1.57019668  | -0.98449202                     |             | H | -1.98774930 |
| -1.47189125                     | H           | 5.23472383  | 0.73039103  | -3.15459100                     | -0.98452209 |   | H           |
| -0.29196800                     | H           | -5.29961890 | 0.68562618  | 3.71970457                      |             |   | -3.39903989 |
| -0.15700646                     | H           | 4.97951816  | 2.47475915  | -1.29570568                     |             | H | -3.70756020 |
| -0.21195600                     | H           | -5.11382341 | 2.43730286  | -3.41000839                     | -1.29675937 |   | C           |
| -0.06136282                     | H           | 3.95324386  | -3.60116907 | -3.61627599                     |             |   | 0.40926132  |
| -0.20294941                     | H           | 2.27300446  | -3.24217314 | -2.37661090                     |             | C | 3.61633936  |
| -0.60439180                     | H           | 3.59439442  | -2.58969381 | 0.42154260                      | -2.37455078 |   | H           |

|                                |            |             |             |                   |             |             |
|--------------------------------|------------|-------------|-------------|-------------------|-------------|-------------|
| -1.60575358                    | H          | -4.00911223 | -3.54566418 | -4.33491182       |             | -0.42296394 |
| -0.09182159                    | H          | -3.69729340 | -2.53027587 | -2.33038105       | H           | 4.33723742  |
| -1.50216682                    | H          | -2.34330191 | -3.19771876 | -0.40878223       | -2.32915708 | H           |
| -0.55510165                    | C          | 0.00928866  | 0.02932599  | -2.71551561       |             | 0.05514726  |
| 1.86347237                     | Mn         | -0.02287807 | -0.22766903 | -2.89745062       | H           | 2.71653131  |
| 0.11066629                     | C          | -0.03814152 | -1.97111261 | 0.06546578        | -2.89568942 | H           |
| 0.31342396                     | O          | -0.03453134 | -3.14324374 | -4.07317080       |             | 1.18474355  |
| 0.41048273                     | H          | -1.22168376 | 3.27398532  | -3.00909187       | H           | 4.07107518  |
| -0.54422323                    | H          | -0.03629899 | 0.65598929  | 1.19886868        | -3.00631845 | C           |
| -2.07908660                    | C          | -0.16406908 | 2.99816480  | -4.57121644       |             | 1.46174023  |
| -0.27769680                    | O          | 0.12830713  | 1.70765032  | -0.29872905       | C           | 4.56855291  |
| -0.66817816                    | C          | 0.70782186  | 3.98259555  | 1.47479215        | -0.29581250 | H           |
| -1.05312705                    | H          | 0.41908701  | 5.02856436  | -4.35854644       |             | 2.00261954  |
| -0.86689140                    | H          | 1.77011711  | 3.87908227  | 0.63362676        | H           | 4.35442985  |
| -0.77794771                    | H          | 0.62797665  | 3.79644782  | 2.01404357        | 0.63715198  | H           |
| -2.13412452                    | C          | -0.03552618 | 3.21721088  | -5.25254479       |             | 0.63137456  |
| 1.22169058                     | H          | 0.98002104  | 2.96575069  | -0.05324371       | H           | 5.25244256  |
| 1.56751242                     | H          | -0.24141283 | 4.26007248  | 0.64622583        | -0.05137565 | H           |
| 1.50887642                     | H          | -0.73357603 | 2.57371124  | -5.13304255       |             | 2.14946498  |
| 1.77563986                     |            |             |             | -0.94889772       | H           | 5.12815315  |
|                                |            |             |             | 2.16489431        | -0.94538442 | H           |
|                                |            |             |             | -3.93547267       |             | -3.38959989 |
|                                |            |             |             | 1.24785182        | H           | -2.26255887 |
|                                |            |             |             | -2.90996656       | 1.53222411  | H           |
|                                |            |             |             | -3.60001011       |             | -1.93122001 |
|                                |            |             |             | 2.18584866        | H           | 3.94581779  |
|                                |            |             |             | -3.37905715       | 1.24926352  | H           |
|                                |            |             |             | 3.60564790        |             | -1.92189611 |
|                                |            |             |             | 2.18748265        | H           | 2.27137281  |
|                                |            |             |             | -2.90411821       | 1.53260048  | C           |
|                                |            |             |             | 0.00207793        |             | -0.47089070 |
|                                |            |             |             | -1.95985877       | Mn          | 0.00126943  |
|                                |            |             |             | -0.26167986       | -0.18976904 | C           |
|                                |            |             |             | 0.00367910        |             | -1.97118235 |
|                                |            |             |             | 0.15745396        | O           | 0.00589334  |
|                                |            |             |             | -3.10356488       | 0.46696575  | H           |
|                                |            |             |             | -0.00040702       |             | 1.85513075  |
|                                |            |             |             | -0.23636824       | H           | -0.00144809 |
|                                |            |             |             | 1.40517908        | 1.77452064  | C           |
|                                |            |             |             | -0.00245635       |             | 2.96774968  |
|                                |            |             |             | 0.29068050        | O           | -0.00108838 |
|                                |            |             |             | 2.85437621        | 1.60473024  | C           |
|                                |            |             |             | 1.24319092        |             | 3.66659472  |
|                                |            |             |             | -0.26383128       | H           | 1.33410308  |
|                                |            |             |             | 3.61001699        | -1.36036087 | H           |
|                                |            |             |             | 1.19339650        |             | 4.72981442  |
|                                |            |             |             | 0.01575985        | H           | 2.15655927  |
|                                |            |             |             | 3.26973792        | 0.19822461  | C           |
|                                |            |             |             | -1.25225258       |             | 3.66084168  |
|                                |            |             |             | -0.26166903       | H           | -1.20766917 |
|                                |            |             |             | 4.72388339        | 0.01946425  | H           |
|                                |            |             |             | -1.34385233       |             | 3.60534491  |
|                                |            |             |             | -1.35820367       | H           | -2.16317072 |
|                                |            |             |             | 3.25859824        | 0.20055979  |             |
| <b>TSB-iPrOH-H<sup>+</sup></b> |            |             |             | <b>2H-Mn-5_1A</b> |             |             |
| P                              | 0.03811411 |             | 0.20224584  | P                 | -2.30774658 | -0.27573254 |
| 2.26717572                     | P          | 0.04095698  | 0.20301890  | -0.13794045       | P           | 2.09212190  |

|             |             |             |             |             |             |             |
|-------------|-------------|-------------|-------------|-------------|-------------|-------------|
| -2.26443094 | C           | 1.76993319  | -0.43643528 | -0.28098669 | -0.09639988 | C           |
| 2.42084993  | C           | 1.76722167  | -0.44964019 | -2.48888855 |             | 0.53868181  |
| -2.41281353 | H           | 1.71115454  | -1.53657899 | -1.80326658 | C           | 2.34141659  |
| 2.35155149  |             | H           | 1.69984379  | 0.42532125  | -1.80270062 | H           |
| -1.54857320 | -2.32995679 | H           | 2.25150772  | -2.44967808 |             | 1.63030338  |
| -0.19608513 | 3.38108258  | H           | 2.25092571  | -1.64232394 | H           | 2.37076367  |
| -0.22178908 | -3.37505531 | C           | 2.57247789  | 1.52347503  | -1.70510733 | H           |
| 0.06559719  | 1.23302085  | C           | 2.57294724  | -3.45251086 |             | 0.32634555  |
| 0.05670224  | -1.22888354 | H           | 3.58716506  | -2.29171032 | H           | 3.29147546  |
| -0.37624658 | 1.23785911  | H           | 3.58562601  | 0.12029466  | -2.26618130 | C           |
| -0.38970364 | -1.23195200 | H           | 2.70337603  | -1.31511442 |             | 0.12023134  |
| 1.16089978  | 1.26431875  | H           | 2.70831153  | -2.66861333 | C           | 1.14990847  |
| 1.15127800  | -1.26561554 | N           | 1.86005414  | 0.04204712  | -2.66016737 | H           |
| -0.29355515 | 0.00335363  | C           | -0.98241729 | -1.30943855 |             | 0.67597065  |
| -0.92353326 | -3.34542119 | C           | -0.97612797 | -3.62690074 | H           | 1.17311622  |
| -0.92878321 | 3.35289887  | H           | -1.14461037 | 0.57837860  | -3.62908646 | H           |
| -1.79542163 | -2.69867213 | H           | -1.12751954 | -1.37194844 |             | -0.95286298 |
| -1.80743110 | 2.71269053  | C           | 0.02479502  | -2.92052660 | H           | 1.15285383  |
| 1.77917211  | -3.28354731 | C           | 0.00841296  | -1.03792043 | -2.88874707 | N           |
| 1.78106315  | 3.28235690  | C           | 1.32983099  | -0.07776417 |             | 0.34311769  |
| 2.56088294  | -3.25076448 | C           | 1.30860525  | -1.92044423 | C           | 2.81110456  |
| 2.57095849  | 3.25300742  | O           |             | 1.09301219  | 0.94807309  | C           |
| -3.12198085 | 0.62918641  | -0.00101938 | H           | -3.09702361 |             | 1.00210677  |
| -0.14542176 |             |             | 1.42972891  | 0.97914118  | H           | 2.23649751  |
| 4.32044268  | H           | -0.12683586 | 1.42566693  | 1.93999690  | 0.53370170  | H           |
| -4.32129221 | C           | -1.16817520 | 2.67404211  | -2.60130496 |             | 1.91767655  |
| 2.89993619  | C           | -1.14740011 | 2.68100829  | 0.60930565  | C           | 3.33631509  |
| -2.90842844 | H           | -2.11492091 | 2.13085706  | -1.67005398 | 0.01359690  | C           |
| 2.78842447  | H           | -2.09818573 | 2.14456151  | -3.54816058 |             | -1.67213549 |
| -2.79917299 | H           | -0.98211338 | 3.19352100  | -0.20296702 | C           | 3.31716428  |
| 1.95142749  | H           | -0.96149794 | 3.20178190  | -2.56011814 | -1.22057536 | C           |
| -1.96062609 | H           | -1.32125875 | 3.44868474  | -3.42333692 |             | -2.49123704 |
| 3.66667257  | H           | -1.29227765 | 3.45452659  | -1.47899052 | O           | -0.13253668 |
| -3.67788795 | C           | -2.35453069 | -0.34335902 | -1.55422299 | 2.82008275  | H           |
| -3.65506065 | C           | -2.35490809 | -0.35981990 | -4.55059625 |             | -1.20758539 |
| 3.65378404  | H           | -2.30036251 | 0.50649476  | -0.19392281 | H           | 4.33363581  |
| -4.35218739 | H           | -2.31123213 | 0.49501694  | -1.19843385 | 0.08352393  | C           |
| 4.34552271  | H           | -2.88519030 | -0.01133539 | -3.39493495 |             | -2.55284064 |
| -2.75154885 | H           | -2.88512625 | -0.03836295 | 1.02876162  | C           | 3.08044039  |
| 2.74616963  | H           | -2.98211638 | -1.10692422 | -2.49008475 | 1.27080648  | H           |
| -4.13848621 | H           | -2.97724600 | -1.12600547 | -3.50765522 |             | -1.99433889 |
| 4.13982734  | C           | -0.26673062 | -1.37838715 | 1.96897570  | H           | 3.06326500  |
| -4.60745136 | C           | -0.26005764 | -1.36723298 | -1.88277841 | 2.18664593  | H           |
| 4.62054967  |             | H           | 0.65898766  | -2.40203768 |             | -3.02763750 |
| -1.93121560 | -4.39529318 | H           | 0.67172836  | 1.05180140  | H           | 2.10896784  |
| -1.91257584 | 4.41568433  | H           | -0.00435386 | -3.00392534 | 1.21044917  | H           |
| -0.53447987 | -5.26546560 | H           | -0.00824761 | -4.14620422 |             | -3.35704363 |
| -0.51617338 | 5.27342292  | H           | -0.91331350 | 1.03220451  | H           | 3.85475263  |
| -2.04706353 | -5.19625572 | H           | -0.90193752 | -3.26146764 | 1.39931834  | C           |
| -2.03804248 | 5.21204362  | H           | 1.25532867  | 2.45349819  |             | 0.99093072  |
| 3.43734088  | -3.91233956 | H           | 1.55143607  | 2.42105657  | C           | -2.70260019 |
| 2.94584222  | -2.24551081 | H           | 2.19359862  | 0.84725609  | 2.43901187  | H           |
| 1.97585065  | -3.59577466 | H           | 1.22525390  | 2.97062550  |             | 0.15902648  |
| 3.44911833  | 3.91125743  | H           | 2.17441408  | 2.92225258  | H           | -3.10167610 |
| 1.99285128  | 3.60444041  | H           | 1.53289060  | -0.07342524 | 2.88991481  | H           |
| 2.95401532  | 2.24769351  | C           | -1.96196205 | 1.37372886  |             | 0.84532247  |
| 0.48525305  | -0.00027789 | Mn          | -0.19820397 | 2.56415637  | H           | -1.61111692 |

|             |             |   |             |             |             |             |
|-------------|-------------|---|-------------|-------------|-------------|-------------|
| 0.27161548  | 0.00090224  | C | 0.18597898  | 0.82215920  | 2.55917468  | H           |
| 1.98708769  | 0.00138687  | O | 0.50734226  | 2.74724704  |             | 1.90989971  |
| 3.11763077  | -0.00009797 | H | -0.33951745 | 2.95382910  | H           | -3.09223809 |
| -1.57926335 | -0.01106000 | H | 1.79893988  | 1.68880484  | 3.03305210  | C           |
| -1.33824567 | 0.00459144  | C | 0.28103108  | 4.29055949  |             | 1.36159127  |
| -3.06287291 | -0.01698666 | O | 1.53818271  | 0.73015862  | C           | -4.59803747 |
| -2.93821057 | -0.03519157 | C | -0.35369998 | 1.16511554  | 0.80448369  | H           |
| -3.60043799 | 1.25245670  | H | -1.43188800 | 4.56168452  |             | 1.42260529  |
| -3.40209899 | 1.32658662  | H | -0.21545975 | -0.33490176 | H           | -4.89977180 |
| -4.69399365 | 1.24912138  | H | 0.16268607  | 1.25046801  | -0.25048147 | H           |
| -3.22381780 | 2.14297646  | C | -0.38890635 | 4.91916102  |             | 0.58238825  |
| -3.60989530 | -1.26414949 | H | -0.26237867 | 1.18769326  | H           | -5.15384202 |
| -4.70476804 | -1.24948046 | H | -1.46641728 | 0.32132295  | 1.24109810  | H           |
| -3.40120727 | -1.31643735 | H | 0.11131374  | 4.58898723  |             | 2.31415950  |
| -3.25060882 | -2.17089129 |   |             | 1.19656563  | H           | -4.95332573 |
|             |             |   |             | 2.07176148  | 1.31819156  | H           |
|             |             |   |             | 4.05067780  |             | -3.37326685 |
|             |             |   |             | -1.11070876 | H           | 2.33624762  |
|             |             |   |             | -3.03353533 | -1.36698369 | H           |
|             |             |   |             | 3.57619244  |             | -2.02280690 |
|             |             |   |             | -2.14364887 | H           | -4.15953145 |
|             |             |   |             | -3.30943264 | -1.47576414 | H           |
|             |             |   |             | -3.61250468 |             | -1.89997554 |
|             |             |   |             | -2.38648714 | H           | -2.43194906 |
|             |             |   |             | -2.95525255 | -1.57478320 | C           |
|             |             |   |             | -0.12422920 |             | -1.20509151 |
|             |             |   |             | 1.70225483  | Mn          | -0.10935421 |
|             |             |   |             | -0.64446983 | 0.03001360  | C           |
|             |             |   |             | -0.09223800 |             | -2.29945760 |
|             |             |   |             | -0.63081583 | O           | -0.08093217 |
|             |             |   |             | -3.41276707 | -1.00900209 | H           |
|             |             |   |             | -0.13578954 |             | 0.90217752  |
|             |             |   |             | 0.58895141  | H           | -0.04324195 |
|             |             |   |             | 1.33384655  | -1.65825935 | C           |
|             |             |   |             | 0.65022276  |             | 3.84629004  |
|             |             |   |             | -0.24227630 | O           | 0.53463126  |
|             |             |   |             | 3.22837169  | -1.28596552 | C           |
|             |             |   |             | -0.45279190 |             | 3.89743819  |
|             |             |   |             | 0.76992598  | H           | -0.37589845 |
|             |             |   |             | 2.97543732  | 1.37372457  | H           |
|             |             |   |             | -0.38705692 |             | 4.76029852  |
|             |             |   |             | 1.44477891  | H           | -1.43207082 |
|             |             |   |             | 3.87030113  | 0.27680089  | C           |
|             |             |   |             | 1.92084539  |             | 4.56629896  |
|             |             |   |             | 0.10765297  | H           | 1.74933206  |
|             |             |   |             | 5.65310812  | 0.06549945  | H           |
|             |             |   |             | 2.22646507  |             | 4.34780077  |
|             |             |   |             | 1.14187940  | H           | 2.72921984  |
|             |             |   |             | 4.30932025  | -0.58688930 |             |

## REFERENCES

1. P. J. A. Joseph, S. Priyadarshini, M. L. Kantam and B. Sreedhar, Investigation of the scope and mechanism of copper catalyzed regioselective methylthiolation of aryl halides, *Tetrahedron*, 2013, **69**, 8276-8283.
2. S. Hu, Y. Jin, Y. Liu, M. Ljungman and N. Neamati, Synthesis and mechanistic studies of quinolin-chlorobenzothioate derivatives with proteasome inhibitory activity in pancreatic cancer cell lines, *Eur. J. Med. Chem*, 2018, **158**, 884-895.
3. J. R. Cabrero-Antonino, R. Adam, K. Junge, R. Jackstell and M. Beller, Cobalt-catalysed transfer hydrogenation of quinolines and related heterocycles using formic acid under mild conditions, *Catal. Sci. Technol*, 2017, **7**, 1981-1985.
4. J. Preindl, S. Chakrabarty and J. Waser, Dearomatization of electron poor six-membered N-heterocycles through [3 + 2] annulation with aminocyclopropanes, *Chem. Sci*, 2017, **8**, 7112-7118.
5. B. Sahoo, C. Kreyenschulte, G. Agostini, H. Lund, S. Bachmann, M. Scalone, K. Junge and M. Beller, A robust iron catalyst for the selective hydrogenation of substituted (iso)quinolones, *Chem. Sci*, 2018, **9**, 8134-8141.
6. M. Schlagbauer, F. Kallmeier, T. Irrgang and R. Kempe, Manganese-Catalyzed beta-Methylation of Alcohols by Methanol, *Angew. Chem. Int. Ed*, 2020, **59**, 1485-1490.
7. A. Jana, A. Kumar and B. Maji, Manganese catalyzed C-alkylation of methyl N-heteroarenes with primary alcohols, *Chem Commun (Camb)*, 2021, **57**, 3026-3029.
8. W. Liu, J. Xu, X. Chen, F. Zhang, Z. Xu, D. Wang, Y. He, X. Xia, X. Zhang and Y. Liang, CuI/2-Aminopyridine 1-Oxide Catalyzed Amination of Aryl Chlorides with Aliphatic Amines, *Org. Lett*, 2020, **22**, 7486-7490.
9. W. Li, X. Cui, K. Junge, A.-E. Surkus, C. Kreyenschulte, S. Bartling and M. Beller, General and Chemoselective Copper Oxide Catalysts for Hydrogenation Reactions, *ACS Catal.*, 2019, **9**, 4302-4307.
10. T. A. Clohessy, A. Roberts, E. S. Manas, V. K. Patel, N. A. Anderson and A. J. B. Watson, Chemoselective One-Pot Synthesis of Functionalized

- Amino-azaheterocycles Enabled by COware, *Org. Lett*, 2017, **19**, 6368-6371.
11. R. Adam, J. R. Cabrero-Antonino, A. Spannenberg, K. Junge, R. Jackstell and M. Beller, A General and Highly Selective Cobalt-Catalyzed Hydrogenation of N-Heteroarenes under Mild Reaction Conditions, *Angew. Chem. Int. Ed*, 2017, **56**, 3216-3220.
  12. Y. Wang, L. Zhu, Z. Shao, G. Li, Y. Lan and Q. Liu, Unmasking the Ligand Effect in Manganese-Catalyzed Hydrogenation: Mechanistic Insight and Catalytic Application, *J. Am. Chem. Soc*, 2019, **141**, 17337-17349.
  13. O. Kazuhiko, H. Takahiro, T. Mitsuhiro, U. Shiho, T. Masao and S. Hiroshi, IODINATION OF BENZOCYCLIC AMINES WITH MERCURY(II)OXIDE-IODINE REAGENT, *Heterocycl. Commun.*, 1997, **3**, 207-210.
  14. D. Pi, H. Zhou, P. Cui, R. He and Y. Sui, Silver-Catalyzed Biomimetic Transfer Hydrogenation of N-Heteroaromatics with Hantzsch Esters as NADH Analogues, *ChemistrySelect*, 2017, **2**, 3976-3979.
  15. D. Bhattacharyya, S. Nandi, P. Adhikari, B. K. Sarmah, M. Konwar and A. Das, Boric acid catalyzed chemoselective reduction of quinolines, *Org. Biomol. Chem*, 2020, **18**, 1214-1220.
  16. Fujita. K, Yamamoto. K and Y. R., Oxidative Cyclization of Amino Alcohols Catalyzed by a Cp\*Ir Complex. Synthesis of Indoles, 1,2,3,4-Tetrahydroquinolines, and 2,3,4,5-Tetrahydro-1-benzazepine, *Org. Lett*, 2002, **4**, 2691-2694.
  17. Y. N. Duan, X. Du, Z. Cui, Y. Zeng, Y. Liu, T. Yang, J. Wen and X. Zhang, Homogeneous Hydrogenation with a Cobalt/Tetraphosphine Catalyst: A Superior Hydride Donor for Polar Double Bonds and N-Heteroarenes, *J. Am. Chem. Soc*, 2019, **141**, 20424-20433.
  18. S. Ökten, Synthesis of aryl-substituted quinolines and tetrahydroquinolines through Suzuki–Miyaura coupling reactions, *J. Chem. Res*, 2019, **43**, 274-280.
  19. P. Pandey, P. Daw, N. U. Din Reshi, K. R. Ehmman, M. Hölscher, W. Leitner and J. K. Bera, A Proton-Responsive Annulated Mesoionic Carbene (MIC) Scaffold on

- Ir Complex for Proton/Hydride Shuttle: An Experimental and Computational Investigation on Reductive Amination of Aldehyde, *Organometallics*, 2020, **39**, 3849-3863.
20. M. Frisch, G. Trucks, H. Schlegel, G. Scuseria, M. Robb, J. Cheeseman, G. Scalmani, V. Barone, G. Petersson and H. Nakatsuji, Gaussian 16, Gaussian, Inc. Wallingford, CT, 2016.
21. (a) Y. Zhao and D. G. Truhlar, A new local density functional for main-group thermochemistry, transition metal bonding, thermochemical kinetics, and noncovalent interactions, *J. Chem. Phys.*, 2006, **125**, 194101; (b) F. Weigend and R. Ahlrichs, Balanced basis sets of split valence, triple zeta valence and quadruple zeta valence quality for H to Rn: Design and assessment of accuracy, *Phys. Chem. Chem. Phys.*, 2005, **7**, 3297-3305; (c) D. Andrae, U. Häußermann, M. Dolg, H. Stoll and H. Preuß, Energy-adjusted ab initio pseudopotentials for the second and third row transition elements, *Theor. Chim. Acta*, 1990, **77**, 123-141.
22. A. V. Marenich, C. J. Cramer and D. G. Truhlar, Universal Solvation Model Based on Solute Electron Density and on a Continuum Model of the Solvent Defined by the Bulk Dielectric Constant and Atomic Surface Tensions, *J. Phys. Chem. B*, 2009, **113**, 6378-6396.
